# Supplementary material for: Syntaxin 17 recruitment to mature autophagosomes is temporally regulated by PI4P accumulation
Source: eLife. 2024 Jun 4;12:RP92189. doi: 10.7554/eLife.92189 (PMC11152571; doi:10.7554/eLife.92189)
Supplement: Figure 1—source data 1. [file elife-92189-fig1-data1.xlsx]

## Sheet: Figure 1C
TM	TM ΔC
121.125	26.2751
332.848	20.6417
1544.03	37.8326
616.705	93.8727
374.595	47.7082
565.519	66.7893
565.711	39.675
350.521	28.6994
1057.63	60.5752
1216.69	33.9047
1094.6	37.6994
471.321	47.1809
483.872	20.3171
2179.23	92.5536
1143.44	46.2251
1442.51	209.829
810.095	352.396
1153.45	82.8718
794.062	335.927
1066.89	57.7949
565.826	146.674
1153.11	107.562
984.075	198.833
978.336	211.417
740.679	40.3807
147.811	352.759
111.96	67.5857
203.285	138.55
833.86	337.038
745.917
1283.04
352.068
2096.42
1829.08
155.229
470.175
821.576
858.897
791.019
647.783
1186.6
201.909
1236.66
1105.7
1573.95
1391.78
1580.75
196.07

## Sheet: Figure 1D
TM	4A3KR	5A2KR	6A1KR	7A0KR	TM ΔC
950.842	950.842	510.39	272.121	508.773	27.8393
306.618	306.618	477.654	55.2668	319.896	31.8929
680.196	680.196	405.396	179.069	86.7222	99.9392
886.768	886.768	67.947	120.212	452.407	37.3357
1490.76	1490.76	324.07	128.584	166.569	30.1786
1563.12	1563.12	260.038	175.886	269.867	76.4097
849.511	849.511	51.206	115.748	213.523	34.8929
918.384	918.384	203.36	93.5833	426.214	25.8869
145.988	145.988	502.083	277.391	667.896	39.35
1052.36	1052.36	298.801	252.033	411.002	25.7875
682.459	682.459	389.807	151.241	649.948	41.6964
1071.74	1071.74	306.289	35.4583	305.521	45.1
188.951	188.951	312.652	215.878	112.546	33.2458
738.075	738.075	324.332	170.543	209.326	27.5776
709.33	709.33	392.15	91.5699	115.294	50.2077
687.701	687.701	494.575	186.73	148.658	32.7924
486.124	486.124	359.289	138.248	107.814	55.4672
479.447	479.447	204.972	125.134	362.324	34.6324
559.405	559.405	114.018	302.471	193.346	49.2125
1014.83	1014.83	365.676	198.853	124.698	17.619
870.808	870.808	892.984	99.6614	65.6202	47.579
672.68	672.68	111.452	142.554	211.055	78.0375
1224.12	1224.12	373.055	84.9625	268.176	37.6786
557.82	557.82	101.376	433.619	111.468	42.7234
289.104	289.104	601.337	77.1282	262.668	35.0278
447.692	447.692	233.424	253.002	94.6793	56.9753
1530.36	1530.36	384.085	250.955	168.768	37.5779
663.826	663.826	138.83	204.818	479.767	43.4762
1256.22	1256.22	323.964	111.896	221.408	33.3792
588.644	588.644	95.9125	434.805	263.941	30.275
748.28	233.736		454.122	189.785
904.764	1229.31		443.779	119.496
1137.88	766.18		500.007
1588.97	353.183		387.792
1924.02	622.917		820.85
831.735	337.896		756.044
453.804	975.405		1062.85
200.957	948.715		552.842
143.122	619.051		251.218
1172.22	704.559
1530.82	717.308
1735.02	1257.81
530.546	238.95
1525.33
1262.53
1061.78
794.621
111.498
1242.81
1283.32
809.326
355.529
334.929
1648.65
389.452
426.946
1705.66
270.743
892.761
563.875
434.533

## Sheet: Figure1E
TM	5K	5R	5D	5A
69.5596	1055.38	72.6367	120.152	19.2496
2109.82	32.2184	347.99	69.5273	16.5652
1340.94	836.324	1810.31	40.3441	18.2897
1596.7	168.054	339.579	38.6768	7.2292
1169.8	526.282	159.071	72.6732	9.7667
98.5196	1144.48	2475.25	50.2356	18.1632
2093.65	532.062	1618.12	54.9118	13.675
81.5424	441.933	1053.06	57.6071	8.5307
1211.29	88.0735	64.1092	101.981	23.8502
922.876	374.741	621.152	18.5839	19.4017
537.089	533.532	186.978	62.2596	33.6214
2051.89	1350.27	1017.78	66.0267	15.6889
1270.47	1489.48	1168.12	60.6575	17.4875
275.754	172.382	876.42	140.403	11.3705
659.278	1262.68	1716.34	100.966	8.7411
849.513	750.491	436.07	89.9808	102.256
33.9347	606.662	2217.7	87.9135	12.1708
112.002	923.141	2124.24	73.0148	19.8394
821.821	87.5625	879.364	26.0542	9.3535
1000.71	963.929	1946.13	108.689	17.6248
126.027	1302.87	2352.4	64.025	16.7547
1005.85	433.226	240.942	138.225	22.3214
396.025	590.618	127.748	98.1145	9.3889
1508.62	203.2	292.701	49.5179	7.4984
72.5179	177.34	2425.3	51.0982	6.7804
260.638	3118.56	2512.97	112.125	10.4583
1539.48	3018.23	1830.49	70.8625	14.625
78.7619	334.413	668.199	55.5429	14.3571
2529.57	809.571	1810.53	48.8427	11.986
3374.11	1134.47	1571.65	67.2036	42.2353
		2954.56	49.5886	31.825
		1823.42		14.5417
		684.694

## Sheet: Figure 1Sup1B
HsSTX17TM	DmSTX17TM	CeSTX17TM	HsSTX17TM ΔC
1157.85	849.586	135.892	102.591
683.602	799.065	77.5448	26.0974
886.984	282.873	210.096	107.575
1010.49	608.494	209.1	32.5109
978.739	75.1574	198.742	54.8161
933.713	380.744	242.72	73.3393
77.3036	464.215	222.713	74.3731
620.36	102.995	267.911	80.9986
1041.93	34.4667	200.915	48.3029
871.75	598.358	116.801	107.996
524.92	472.733	113.639	52.8547
618.458	213.829	198.384	164.416
1045.32	241.277	373.577	131.896
306.154	378.981	224.617	50.0542
303.629	410.425	317.543	51.6625
432.652	326.562	587.476	33.9159
110.161	460.756	474.161	33.4137
1534.54	61.9348	531.534	40.0694
720.854	842.831	234.634	34.5929
888.743	198.267	262.283	62.9137
596.475	268.636	841.623	26.7009
906.895	92.7564	86.3929	60.004
586.403	379.475	173.191	26.7929
396.886	260.793	396.574	81.0785
817.513	510.329	201.874	227.067
881.332	245.821	225.38	39.5649
397.454	1667.56	342.519	61.1696
1128.59	1212.29	217.758	69.2946
217.933	377.587	103.73	81.382
178.964	835.356	101.455	159.674
	120.205	243.598	137.436
	224.404	311.611	57.6025
	202.212	136.473
		135.562
		178.689
		260.476
		188.951
		223.6
		280.317
		98.4752
		139.366
		136.969
