# Supplementary material for: Syntaxin 17 recruitment to mature autophagosomes is temporally regulated by PI4P accumulation
Source: eLife. 2024 Jun 4;12:RP92189. doi: 10.7554/eLife.92189 (PMC11152571; doi:10.7554/eLife.92189)
Supplement: Figure 2—source data 1. [file elife-92189-fig2-data1.xlsx]

## Sheet: Figure 2A
TM_PE	TM_PS	TM_PI3P	TM_PI4P
267.871	2591.37	513.961	3181.75
297.119	2086.25	585.625	2818.51
60.7758	1946.21	288.833	1213.2
392.214	2344.05	590.465	853.253
43.1437	2697.57	1627.44	1525.82
65.687	866.794	349.28	1845.41
68.7321	1671.61	578.379	2044.64
447.847	2058.93	769.271	1569.25
510.427	2032.2	475.192	2993.3
416.953	2167.29	2644.38	2305.12
117.525	2061.51	1793.85	2363.78
46.3446	1349.44	1610.28	1963.62
46.7887	1756.13	3232.64	1561.22
10.6917	2460.34	1066.26	1491.7
79.8424	1091.79	2269.17	2389.57
62.2696	682.946	1282.96	1777.95
86.2327	1724.62	756.64	485.985
57.4464	2701.7	1759.08	1858.53
97.9655	389.119	1861.38	1687.56
49.6774	182.477	2152.56	762.118
28.0208	1463.41	1189.96	1379.34
217.154	2369.49	2152.81	1028.67
480.475	2065.18	968.008	1350.55
314.471	2721.73	530.982	2575.13
333.696	1947.97	1972.6	999.738
653.158	1863.36	1275.07	1010.34
1041.85	443.027	1247.3	2260.96
973.361	1718.36	1231.65	1055.5
1666.82	1541.97	825.283	237.242
1744.44	1477.48	600.214
618.715		1038.21
		957.435
		1231.8
		843.214
		422.288

## Sheet: Figure 2B
Sucrose	1M NaCl
129.554	23.7938
36.3769	14.9286
63.2625	26
70.8146	9.66667
100.35	16.9583
264.969	25.5989
170.74	22.3929
319.638	35.184
34.7	23.4688
39.9167	19.6614
69.8334	24.1611
106.3	43.7625
222.967	21.4875
90.7143	55.1944
79.0208	31.1679
87.25	40.0156
82.125	28.3929
94.0321	19.3375
108.573	31.575
97.0125	55.7529
53.1095	20.5357
147.479	39.2893
85.8906	24.5286
76.0181	27.3588
38.1429	18.325
86.8125	8.05
157.639	20.7656
96.075	12.2292
109.529	17.4167
64.9286	34.9036
108.238	90.0781
68.1528	57.9844

## Sheet: Figure 2D
0K9Q	1K8Q	3K6Q	5K4Q	9K0Q
0	361.296	133.094	0	101.519
703.919	509.232	538.343	282.561	83.075
125.4	422.598	599.407	109.055	240.184
936.306	2278.2	360.402	1291.38	11.544
770.034	1234.7	960.15	819.786	334.935
641.911	1749.55	1562.27	498.22	58.664
984.123	655.097	1279.4	798.174	237.544
204.471	236.654	988.152	1104.63	185.61
499.973	658.32	1934.52	972.575	183.73
0	854.175	1336.79	1206.36	0
0	542.76	1694.48	606.943	0
140.974	893.628	1024.82	892.021	30.17
0	321.826	837.97	1209.59	20.203
0	287.082	885.4	556.722	0
0	638.975	879.363	675.656	82.375
0	125.186	275.038	695.306	28.152
545.01	149.748	927.116	842.405	75.76
611.817	515.294	509.64	1504.14	0
0	196.89	851.565	1041.98	66.982
0	106.004	317.953	1087.15	0
451.25	770.959	134.013	1063.69	44.992
0	614.589	127.451	783.459	0
0	319.082	423.967	947.561	7.962
324.681	828.564	942.531	0	0
484.648	539.873	2510.38	1003.39	0
794.507	863.036	2322.26	315.571	13.813
785.41	653.213	2015.38	377.917	0
621.721	254.557	1509.24	660.316	0
244.622	229.199	2199.14	259.983	67.034
421.08	512.018	821.096	1081.71	204.824
958.935	337.442	1635.43	855.273	220.534
224.911	470.098	687.748	793.917	211.838
0	800.762	501.052	797.363	0
0	421.397	751.38	926.14	63.911
0	427.411	1827.65	612.505	88.844
0	308.919	1983.99	455.497	0
0	571.042	639.595	558.604	169.69
0	1089.1	1605.37	634.61	91.467
0	989.82	577.07	651.679	230.995
0	468.321	550.167	395.524	101.408
382.299	642.062	2212.47	862.352	0
0	543.995	585.478	484.056	221.263
0	567.136	2312.01	221.783	59.363
0	220.192	246.158	278.371	0
745.353	282.815	255.033	524.046	0
0	453.545	20.345	806.96	222.179
815.167	722.868	366.323	772.066	81.493
743.593	512.797	1073.28	1163.32	0
336.762	372.029	1204.3	756.976	49.278
532.387	280.652	729.208	1164.4	360.869
535.422	69.556	1661.42	21.623	91.774
644.92	16.728	1337.22	982.354	0
165.228	238.126	159.172	1871.31	340.599
427.818	0	2256.86	1162.7	109.707
209.106	0	1551.99	457.169	45.554
0	66.064	2017.45	818.204	163.613
529.923	1277.09	796.676	1638.92	11.302
408.619	341.799	2653.31	257.108	113.965
79.543	935.208	1520.9	823.746	13.962
173.084	366.514	1533.93	1014.73	90.519
261.673	1394.1	876.18	1286.02	10.951
62.947	2530.3	2303.66	1339.23	27.639
63.145	663.489	1128.82	1284.39	25.946
0	858.356	2551.81	858.717	85.002
252.732	185.24	2728.54	698.037	92.395
78.668	141.976	529.937	1474.43	3.51
248.563	709.523	1265.48	1006.67	23.316
167.648	194.458	1772.32	1083.23	0
169.349	1507.55	1049.17	1511.64	102.218
0	1053.12	2016.26	1303.79	123.722
121.17	285.322	1948.65	747.19	46.738
327.383	751.491	1854.59	1243.98	13.917
247.783	491.052	1199.03	1143.41	36.612
112.886	1051.38	1474.08	1106.4	0
0		793.168	924.779	0
0		1372.16	708.362
0		1176.3	958.223
0		839.618	668.975
0		2180.77	814.548
0		203.852	974.345
0			591.587
0			93.009
0			284.454
			429.347
			1197.39
			463.356
			608.778
			218.936
			304.886
			885.335
			1355.41
			991.951
			916.531
			687.773
			805.734
			1004.3
			695.967
			923.623
			1137.08
			724.564
			774.929
			408.097
			634.795
			659.361
			911.8
			758.171
			391.938
			736.964
			176.895
			645.019
			929.587
			567.889
			435.358
			246.623
			793.506
			235.468
			86.091
			400.548
			50.783
			0
			0
			75.173
			345.038
			343.235
			225.258

## Sheet: Figure 2E
0K9Q	1K8Q	3K6Q	5K4Q	9K0Q
164.029	0	436.431	344.174	98.722
545.647	0	537.825	348.039	233.864
787.985	0	885.03	918.212	179.125
0	0	712.312	288.894	73.8
313.229	0	869.82	1102.94	28.108
333.292	646.832	616.927	738.808	104.18
696.255	163.336	845.388	175.027	162.049
430.669	525.565	1114.31	996.854	0
128.86	1624.41	1137.52	350.778	153.362
0	0	342.977	233.302	111.412
199.546	1795.85	993.476	67.343	189.843
0	2244.26	1135.31	27.395	104.718
352.753	1616.47	426.109	0	72.015
123.577	371.436	463.06	152.638	84.122
0	1650.31	775.743	364.29	136.935
128.749	0	1109.44	1034.59	98.257
0	1001.05	1282.38	219.982	62.164
285.454	1213.6	1639.82	329.275	99.887
0	0	1754.28	0	94.22
0	0	510.145	680.027	70.266
298.969	2152.09	711.212	109.224	16.195
285.715	612.911	1226.74	323.762	38.236
0	1632.9	1142.22	0	26.003
159.352	1987.74	2064.91	152.461	27.408
386.147	0	782.612	44.035	46.3
6.492	663.125	1269.33	0	34.99
241.013	92.297	864.98	0	0
146.066	0	1042.91	342.866	75.954
86.388	294.948	1063.86	341.296	45.465
190.43	0	1012	126.916	130.903
0	2186.22	1677.62	0	84.342
89.647	346.734	921.445	20.902	203.207
0	654.511	944.334	0	93.508
17.943	0	2036.88	17.749	39.262
0	1025.54	164.255	0	0
0	734.765	919.315	0	0
48.279	626.142	0	143.712	725.145
116.231	702.391	1093.45	756.322	413.587
0	1305.72	1381.55	258.725	0
695.626	668.716	732.866	617.41	749.416
214.673	722.151	587.452	634.284	6.928
3771.03	1714.39	753.61	765.222	21.432
109.048	406.977	365.584	374.679	0
682.8	2552.55	230.177	786.109	100.775
0	2161.97	133.404	557.393	66.202
25.339	2583.12	415.066	765.9	292.41
317.844	361.469	348.029	540.709	205.373
0	791.78	305.128	985.835	261.126
311.194	945.713	298.986	115.395	179.948
249.289	1760.31	204.144	201.542	61.384
699.442	288.788	0	506.572	0
139.479	3894.6	117.507	1072.44	0
349.279	1678.49	438.17	1129.17	0
360.41	3060.4	555.818	913.537	13.018
1078.4	2867.39	113.492	673.572	0
816.848	2971.55	134.228	1221.72	0
976.943	1254.15	446.242	495.923	0
613.301	28.759	194.605	241.558	22.98
0	703.228	477.147	472.775	380.776
1266.78	912.803	0	1524.11	28.67
1.06	2630.95	797.576	503.726	197.395
333.73	1771.56	11.411	1368.3	230.317
134.262	1785.84	660.461	1663.34	244.308
1385.7	348.986	627.284	1732.93	185.536
0	1538.37	511.009	0	293.407
0	628.189	1609.44	468.391	310.546
1128.25	230.096	0	1285.02	271.888
1332.96	2134.53	526.697	656.895	286.152
0	956.27	409.483	348.955	70.427
0	3609.8	1754.46	579.392	0
632.861	1561.86	476.4	576.454	0
940.773	0	1153.41	1083.75	13.945
93.021	722.704	2.325	1323.85	10.865
0	512.577	558.307	1188.52	62.482
657.189	0	778.972	499.717	0
514.085	2292.03	1017.21	314.194	88.323
48.529	1082.36	2152.49	439.36	106.294
0	2027.45	0	598.303	145.505
529.248	682.719	1509.46	710.433	0
0	316.303	326.221	1010.16	109.789
176.798	1206.03	1340.26	0	52.902
212.274	562.78	1060.16	341.414	156.271
0	1630.37	1593.73	1378.87	98.231
0	664.747	1757.3	836.709	147.97
0	40.376	908.495	793.736	115.951
0	1296.62	0	332.834	81.567
0	977.41	797.482	509.262	0
0	0	679.784	1318.37	20.276
0	1612.57	0	1149.17	107.163
0	1202.36	965.219	401.996	77.125
243.169	1008.8	1859.29	284.106	97.418
0	2004.21	1108.31	0	81.616
0	1361.82	1142.67	556.373	54.858
0	1388.61	229.352	710.734	83.139
0	1746.33	299.084	996.233	0
0	1699.53	2475.25	601.452	0
7.264	1944	1628.63	488.31	1.115
0	2553.94	564.897	167.598	22.19
0	989.542	968.844	905.872	0
166.805	294.922	1300.35	565.206	25.125
0	1496.88	1243.59	642.575
0	324.858	1432.6	9.612
0	1900.99	1562.47	586.627
0	687.9	2305	329.262
0	2120.88	823.075	511.345
153.823	240.137	485.562	817.779
0	1539.67	72.135	422.161
185.941	618.843	1064.16	586.392
0	301.411	513.965	554.681
92.598	0	801.321	669.306
0	23.389	1960.53	405.344
310.012	149.634	514.527	1026.79
314.286	0	753.795	0
0	0	846.314	655.402
0	1110.89	970.263	120.52
210.613	1570.58	622.619	0
388.481	1372.35	613.096	293.014
0	913.383	116.285	197.222
0	2171.57	266.156	113.057
279.579	913.508	277.365	0
0	2262.63	0
78.146	0	1846.23
77.616	66.369	383.769
205.064	1127.83	146.001
0	943.34	59.35
804.707	47.404	126.84
45.913	0	208.853
0	1901.64	0
26.748	0	266.413
442.63	1796.88	15.885
249.848	968.07	283.492
0	2217.05	262.045
161.457	822.274	1038.87
0	280.629	54.938
0	802.879	0
737.335	1068.94	347.007
38.308	1292.73	1428.53
163.164	1596.94	1951.16
734.728	1357.28	211.777
166.075	183.063	0
649.153	1968.28	0
571.709	3231.54	646.406
849.402	1461.08	159.907
147.958	1715.24	1012.06
221.77	782.805	1331.88
329.36	1174.58	0
176.779	1507.91	723.884
974.127	6034.27	0
93.685	2075.64	0
1103.68	66.504	1246.78
349.623	2793.24	547.905
0	1282.27	144.915
258.361	370.794	29.671
0	740.978	0
953.591	579.218	760.226
353.896	760.469	0
0	926.654	1735.27
0	43.643	0
360.492	638.824	0
0	36.229	242.586
1804.35	197.125	0
676.109	246.593	167.372
59.772	0	177.068
623.034	131.038	1471.14
0	381.309	441.091
14.505	954.842	0
278.901	0	177.924
407.04	313.707	0
0	281.158	467.947
664.237	475.101	0
0	50.573	0
361.129	90.716	0
1241.83	1654.56	0
0	516.214	0
479.476	1566.36	395.655
0	543.336	199.904
185.528	1374.47	0
0	354.554	0
408.9	0	118.056
0	292.744	0
43.173	883.401	0
524.289	666.113	152.309
0	611.853	103.465
100.574	1008.4	688.969
191.17	1206.81	472.758
73.29	1260.1	462.033
349.586	676.869	598.821
728.554	777.064	868.118
0	1196.99	359.082
26.306	826.614	1860.96
929.282	1528.26	797.616
67.321	220.258	746.792
0	1221.87	794.854
658.14	1108.75	721.77
157.907	1557.62	119.698
0	2966.51	762.045
0	1040.62	1267.54
105.297	1972.2	1316.8
296.306	521.859	1932.1
302.721	893.844	1257.38
0	826.729	1307.77
0	742.302	1067.9
0	670.037	2203.12
0	1346.29	544.962
0	477.442	179.544
0	1043.7	1429.62
	100.146	1274.2
	1390.47	1358.76
	0	1741.13
	478.522	1574.31
	1000.63	1650.56
	376.902	2796.06
	213.324	1001.43
		0
		0
