# Supplementary material for: Syntaxin 17 recruitment to mature autophagosomes is temporally regulated by PI4P accumulation
Source: eLife. 2024 Jun 4;12:RP92189. doi: 10.7554/eLife.92189 (PMC11152571; doi:10.7554/eLife.92189)
Supplement: Figure 3—source data 1. [file elife-92189-fig3-data1.xlsx]

## Sheet: Figure 3A
STX17	ATG5
1442.28	197.696
2430.83	223.853
2178.08	105.753
1932.99	67.492
1137.5	90.82
1211.07	486.252
433.177	296.077
1448.96	0
1238.9	1284.73
157.102	0
1616.52	0
1972.15	0
730.382	0
339.257	0
1667.8	581.981
1062.91	0
0	0
271.408	0
512.519	0
193.549	0
1962.88	0
991.534	0
1483.29	301.651
1395.37	171.316
2445.03	0
2248.19	64.658
1754.2	512.031
1828.2	86.282
969.439	67.684
867.681	262.27
1717.31	0
944.08	0
654.505	0
0	42.6
90.652	192.013
593.293	19.083
1263.28	40.475
54.05	0
379.001	0
1597.54	2.162
407.871	0
367.191	0
28.188	12.605
204.812	0
0	357.079
434.229	0
3970.89	0
2304.51	0
2103.81	0
2240.54	0
1217.53	81.558
382.049	126.233
295.447	0
1140.16	0
969.792	0
2576.49	0
120.495	0
502.247	0
0	0
543.66	0
250.37	0
	0
	2.008
	0
	0
	0
	15.134
	0
	1556.59
	0
	1291.11
	0
	0
	1140
	873.222
	65.526
	0
	0
	0
	0
	0
	0
	29.373
	0
	0
	0
	40.799
	3.176
	62.512
	0
	0
	0
	0
	0
	73.38
	0
	0
	0
	347.65
	0
	0
	0
	0
	0
	0
	0
	0
	0
	72.129
	116.804
	0
	0
	40.572
	0
	0
	0
	19.989
	0
	0
	0
	0
	0
	0
	0
	0
	0
	0
	0
	0
	0
	0
	0
	97.974
	0
	0
	0
	0
	8.866
	126.899
	0
	0
	39.367
	153.127
	7.558
	0
	93.04
	12.84
	0
	0
	0
	0
	1543.86
	0
	0
	1278.38
	141.414
	0
	0
	182.653
	225.235
	492.039
	1937.94
	83.888
	81.408
	1127.27
	0
	860.486
	133.414
	0
	52.79
	135.628
	204.328
	0
	0
	0
	0
	0
	0
	0
	0
	0
	0
	0
	0
	0
	0
	0
	0
	0
	0
	0
	0
	69.37
	0
	0
	0
	0
	0
	0
	0
	0
	0
	0
	0.706
	0
	0
	104.248
	166.175
	0
	0
	0
	0
	0
	15.14
	422.357
	133.173
	0
	0
	45.641
	159.401
	13.832
	0
	99.314
	19.114
	0
	0
	0
	0
	0
	0
	0
	1556.29
	0
	0
	1290.81
	0
	153.844
	0
	0
	492.173
	0
	195.083
	237.665
	0
	504.469
	1950.37
	96.318
	181.967
	93.838
	1139.7
	4.12
	872.916
	0
	0
	145.844
	0
	65.22
	148.058
	0
	216.758
	0
	220.635
	0
	0
	0
	0
	0
	0
	0
	0
	0
	0
	0
	0
	0

## Sheet: Figure 3S2C
FAPP_STX17	FAPP_ATG5	OSBP_STX17	OSBP_ATG5	P4Mx2_STX17	P4Mx2_ATG5
516.824	0	175.434	0	1154.62	0
290.053	0	0	20.96	463.79	0
258.031	51.236	156.722	0	734.385	0
0	0	0	206.742	698.379	141.317
695.972	16.341	694.133	0	86.99	142.404
416.596	0	642.415	60.673	1365.63	206.702
945.444	0	497.725	1708.19	476.676	0
0	49.644	483.091	91.646	474.899	0
238.971	0	340.321	168.742	0	0
107.871	0	2913.76	99.731	215.554	0
823.337	0	980.062	0	117.071	0
158.658	0	1305.92	0	116.785	0
2959.07	21.918	693.438	0	510.59	45.432
2025.63	0	112.011	0	725.867	64.834
65.601	0	1144.63	83.639	457.937	31.435
85.01	0	1550.59	0	380.435	0
1251.51	0	775.24	1772.55	193.151	0
3357.23	178.819	1206.24	17.508	402.598	487.525
0	95.89	481.126	0	214.58	52.892
540.373	11.849	903.729	687.251	97.897	0
23.677	19.292	255.381	90.108	1308.11	43.004
1177.97	169.995	526.112	498.339	360.652	5.766
0	207.257	235.733	64.38	1593.9	7.492
62.288	90.721	527.524	0	0	46.887
695.275	107.152	865.016	0	0	49.141
431.966	0	48.726	0	0	38.454
359.514	0	1068	0	0	0
124.919	0	487.334	0	0	0
503.382	0	357.276	0	0	22.648
0	80.182	268.691	104.328	0	104.082
0	0	187.225	12.84	0	0
157.88	403.06	0	90.086	0	36.896
0	306.015	0	0	598.306	0
288.112	10.197	0	97.806	900.168	0
0	127.526	133.016	0	643.407	15.863
234.6	0	23.646	27.54	0	75.575
0	1461.07	0	163.73	10.691	0
0	985.104	957.361	0	0	0.877
0	76.762	1140.58	0	841.953	0
121.224	80.475	338.404	0	1125.32	62.572
93.507	69.244	548.001	0	1617.79	0
49.161	21.472	3312.01	0	399.773	0
933.935	225.067	129.505	0	808.497	0
379.924	0	554.052	150.763	22.993	0
533.628	0	482.458	1.281	1195.01	37.234
577.29	0	1188.2	35.258	291.948	0
522.113	0	406.228	208.743	470.382	0
364.693	0	1903.77	0	550.19	0
313.787	143.857	1014.89	513.977	32.05	0
148.644	0	171.778	14.084	326.349	0
146.716	198.371	567.776	0	367.845	0
303.062	864.796	487.126	162.937	251.567	18.39
518.813	0	629.185	113.554	892.046	89.954
252.235	0	1299.95	0	503.074	0
135.518	0	1012.62	0	0	0
520.381	431.9	2420.06	0		0
830.359	0	648.119	0		15.419
0	197.577	644.013	0		84.433
290.373	0	353.116	0		0
186.871	0	6445.98	0		42.59
105.58	579.262	776.838	252.634		0
986.938	573.011	0	346.827		0
0	568.804	677.543	382.029		0
727.848	0	377.96	187.295		77.176
991.8	0	779.529	0		84.914
0	0	3547.7	726.297		0
0	0	3192.34	32.151		7.211
396.498	0	5473.21	57.154		29.979
0	0	1410.58	0		99.899
270.533	37.743	212.977	0		171.709
443.538	0	438.625	0		0
0	2304	1482.71	284.649		0
484.586	271.167	726.103	59.313		208.098
0	0	1002.79	11.97		0
	0	606.652	0		0
	0	334.361	101.891		0
	0	1502	0		0
	0	1301.8	0		42.988
	0	1287.91	0		48.914
	106.27	2273.45	0		0
	0	97.005	587.416		0
	268.576	832.229	0		31.728
	0	164.474	0		0
	34.457		0		19.646
	0		0		0
	0		0		0
	677.497		243.234		0
	365.985		0		0
	0		0		0
	154.12		0		16.729
	220.942		0		0
	85.743		0		0
	3.08		211.547		57.172
	1.478		0		0
	0		24.01		0
	1050.35		0		121.043
	0		0		0
	110.853		0		0
	108.414		0		0
	77.881		0		3.592
	170.539		6.732		21.676
	265.855		0		0
	143.135		0		39.229
	0		453.631		0
	28.461		40.985		163.87
	35.453		29.42		0
	0		0		22.693
			12.51		46.271
			34.963		0
			0		0
			43.244		0
			0		0
			62.945		0
			0		0
			0		0
			0		0
			0		0
			0		494.634
			165.552		218.724
			0		381.58
			104.782		201.932
			0		38.612
					75.379
					0
					294.227
