# Supplementary material for: Syntaxin 17 recruitment to mature autophagosomes is temporally regulated by PI4P accumulation
Source: eLife. 2024 Jun 4;12:RP92189. doi: 10.7554/eLife.92189 (PMC11152571; doi:10.7554/eLife.92189)
Supplement: Figure 4—source data 1. [file elife-92189-fig4-data1.xlsx]

## Sheet: Figure 4D
Buffer	WT	C392S
0.2125	0.05	0.1875
0.206897	0.0555556	0.222222
0.225	0.0625	0.1625

## Sheet: Figure 4S1A
(–)	NC03
33.3333	66.6667
46.6667	50
50	28.5714
50	77.7778
55.5556	70.5882
66.6667	100
66.6667	66.6667
50	29.4118
47.8261	100
85.7143	54.5455
27.2727	100
37.5	83.3333
62.5	44.4444
66.6667	62.5
76	50
81.8182	42.1053
55.5556	46.1538
64.7059	33.3333
60	31.8182
40	55.2301
71.4286
57.1429

## Sheet: Figure 4S1B
(–)	NC03
71.4286	70
25	70.5882
53.3333	81.25
45.4545	33.3333
38.0952	66.6667
27.2727	61.5385
100	40
71.4286	58.3333
38.4615	100
60	50
79.4118	62.5
85.7143	68.421
83.3333	88.8889
68.9655	46.875
80.7692	52.0833
100	75
28.5714	50
66.6667	79.1667
68.75	54.386
82.3529	64.2857
68.0851
