# Supplementary material for: Syntaxin 17 recruitment to mature autophagosomes is temporally regulated by PI4P accumulation
Source: eLife. 2024 Jun 4;12:RP92189. doi: 10.7554/eLife.92189 (PMC11152571; doi:10.7554/eLife.92189)
Supplement: Figure 5—source data 1. [file elife-92189-fig5-data1.xlsx]

## Sheet: Figure 1C
TM	TM ΔC
121.125	26.2751
332.848	20.6417
1544.03	37.8326
616.705	93.8727
374.595	47.7082
565.519	66.7893
565.711	39.675
350.521	28.6994
1057.63	60.5752
1216.69	33.9047
1094.6	37.6994
471.321	47.1809
483.872	20.3171
2179.23	92.5536
1143.44	46.2251
1442.51	209.829
810.095	352.396
1153.45	82.8718
794.062	335.927
1066.89	57.7949
565.826	146.674
1153.11	107.562
984.075	198.833
978.336	211.417
740.679	40.3807
147.811	352.759
111.96	67.5857
203.285	138.55
833.86	337.038
745.917
1283.04
352.068
2096.42
1829.08
155.229
470.175
821.576
858.897
791.019
647.783
1186.6
201.909
1236.66
1105.7
1573.95
1391.78
1580.75
196.07

## Sheet: Figure 1D
TM	4A3KR	5A2KR	6A1KR	7A0KR	TM ΔC
950.842	950.842	510.39	272.121	508.773	27.8393
306.618	306.618	477.654	55.2668	319.896	31.8929
680.196	680.196	405.396	179.069	86.7222	99.9392
886.768	886.768	67.947	120.212	452.407	37.3357
1490.76	1490.76	324.07	128.584	166.569	30.1786
1563.12	1563.12	260.038	175.886	269.867	76.4097
849.511	849.511	51.206	115.748	213.523	34.8929
918.384	918.384	203.36	93.5833	426.214	25.8869
145.988	145.988	502.083	277.391	667.896	39.35
1052.36	1052.36	298.801	252.033	411.002	25.7875
682.459	682.459	389.807	151.241	649.948	41.6964
1071.74	1071.74	306.289	35.4583	305.521	45.1
188.951	188.951	312.652	215.878	112.546	33.2458
738.075	738.075	324.332	170.543	209.326	27.5776
709.33	709.33	392.15	91.5699	115.294	50.2077
687.701	687.701	494.575	186.73	148.658	32.7924
486.124	486.124	359.289	138.248	107.814	55.4672
479.447	479.447	204.972	125.134	362.324	34.6324
559.405	559.405	114.018	302.471	193.346	49.2125
1014.83	1014.83	365.676	198.853	124.698	17.619
870.808	870.808	892.984	99.6614	65.6202	47.579
672.68	672.68	111.452	142.554	211.055	78.0375
1224.12	1224.12	373.055	84.9625	268.176	37.6786
557.82	557.82	101.376	433.619	111.468	42.7234
289.104	289.104	601.337	77.1282	262.668	35.0278
447.692	447.692	233.424	253.002	94.6793	56.9753
1530.36	1530.36	384.085	250.955	168.768	37.5779
663.826	663.826	138.83	204.818	479.767	43.4762
1256.22	1256.22	323.964	111.896	221.408	33.3792
588.644	588.644	95.9125	434.805	263.941	30.275
748.28	233.736		454.122	189.785
904.764	1229.31		443.779	119.496
1137.88	766.18		500.007
1588.97	353.183		387.792
1924.02	622.917		820.85
831.735	337.896		756.044
453.804	975.405		1062.85
200.957	948.715		552.842
143.122	619.051		251.218
1172.22	704.559
1530.82	717.308
1735.02	1257.81
530.546	238.95
1525.33
1262.53
1061.78
794.621
111.498
1242.81
1283.32
809.326
355.529
334.929
1648.65
389.452
426.946
1705.66
270.743
892.761
563.875
434.533

## Sheet: Figure1E
TM	5K	5R	5D	5A
69.5596	1055.38	72.6367	120.152	19.2496
2109.82	32.2184	347.99	69.5273	16.5652
1340.94	836.324	1810.31	40.3441	18.2897
1596.7	168.054	339.579	38.6768	7.2292
1169.8	526.282	159.071	72.6732	9.7667
98.5196	1144.48	2475.25	50.2356	18.1632
2093.65	532.062	1618.12	54.9118	13.675
81.5424	441.933	1053.06	57.6071	8.5307
1211.29	88.0735	64.1092	101.981	23.8502
922.876	374.741	621.152	18.5839	19.4017
537.089	533.532	186.978	62.2596	33.6214
2051.89	1350.27	1017.78	66.0267	15.6889
1270.47	1489.48	1168.12	60.6575	17.4875
275.754	172.382	876.42	140.403	11.3705
659.278	1262.68	1716.34	100.966	8.7411
849.513	750.491	436.07	89.9808	102.256
33.9347	606.662	2217.7	87.9135	12.1708
112.002	923.141	2124.24	73.0148	19.8394
821.821	87.5625	879.364	26.0542	9.3535
1000.71	963.929	1946.13	108.689	17.6248
126.027	1302.87	2352.4	64.025	16.7547
1005.85	433.226	240.942	138.225	22.3214
396.025	590.618	127.748	98.1145	9.3889
1508.62	203.2	292.701	49.5179	7.4984
72.5179	177.34	2425.3	51.0982	6.7804
260.638	3118.56	2512.97	112.125	10.4583
1539.48	3018.23	1830.49	70.8625	14.625
78.7619	334.413	668.199	55.5429	14.3571
2529.57	809.571	1810.53	48.8427	11.986
3374.11	1134.47	1571.65	67.2036	42.2353
		2954.56	49.5886	31.825
		1823.42		14.5417
		684.694

## Sheet: Figure 5B
Fig. 5B
Time evolution of the z-coordinate of the center of mass (Zcm) of the transmembrane helices of STX17TM in the case of membranes with PI4P
	#1			#2			#3			#4			#5
	time (nsec)	z_cm (nm)		time (nsec)	z_cm (nm)		time (nsec)	z_cm (nm)		time (nsec)	z_cm (nm)		time (nsec)	z_cm (nm)
	0.1	5.1527		0.1	5.15585		0.1	5.4378		0.1	5.19485		0.1	5.0791
	0.2	5.21		0.2	5.1387		0.2	5.3194		0.2	5.1958		0.2	4.9938
	0.3	4.8836		0.3	5.06195		0.3	5.5761		0.3	5.22785		0.3	4.945
	0.4	5.0524		0.4	5.2673		0.4	5.2785		0.4	4.8604		0.4	5.0211
	0.5	5.2199		0.5	5.51005		0.5	5.2027		0.5	4.90345		0.5	5.1981
	0.6	5.0557		0.6	5.3733		0.6	5.3092		0.6	4.9359		0.6	5.418
	0.7	5.1139		0.7	5.48325		0.7	5.2796		0.7	5.10795		0.7	5.5244
	0.8	5.184		0.8	5.4097		0.8	5.2741		0.8	4.9869		0.8	5.4038
	0.9	5.2789		0.9	5.29155		0.9	4.9288		0.9	4.94475		0.9	5.4571
	1	5.1532		1	5.3169		1	5.1403		1	4.7482		1	5.6042
	1.1	5.2142		1.1	5.32475		1.1	4.8582		1.1	4.53505		1.1	5.5745
	1.2	5.0395		1.2	5.1478		1.2	4.7716		1.2	4.3512		1.2	5.9381
	1.3	5.096		1.3	5.20845		1.3	4.7835		1.3	4.35545		1.3	6.0298
	1.4	4.8239		1.4	5.2332		1.4	4.9835		1.4	4.2564		1.4	5.9161
	1.5	4.7586		1.5	5.28935		1.5	4.6258		1.5	4.25935		1.5	5.7874
	1.6	4.6858		1.6	5.2339		1.6	4.9303		1.6	4.2154		1.6	5.8225
	1.7	4.5359		1.7	5.37795		1.7	4.8119		1.7	4.47945		1.7	5.6309
	1.8	4.4634		1.8	5.3857		1.8	4.8973		1.8	4.4385		1.8	5.695
	1.9	4.5337		1.9	5.40335		1.9	4.9496		1.9	4.26385		1.9	5.7902
	2	4.5121		2	5.2407		2	5.0861		2	4.1575		2	5.9464
	2.1	4.6671		2.1	5.13315		2.1	4.9025		2.1	4.08665		2.1	6.0476
	2.2	4.7757		2.2	5.2366		2.2	5.1506		2.2	3.9188		2.2	6.0243
	2.3	4.92		2.3	5.41545		2.3	5.4207		2.3	3.75915		2.3	5.8316
	2.4	4.9114		2.4	5.4645		2.4	5.2855		2.4	3.8283		2.4	5.8314
	2.5	4.8738		2.5	5.48275		2.5	5.2167		2.5	3.90805		2.5	5.9076
	2.6	4.5609		2.6	5.4883		2.6	4.98		2.6	3.8276		2.6	5.8653
	2.7	4.5809		2.7	5.68785		2.7	4.8845		2.7	3.77425		2.7	5.7507
	2.8	4.6058		2.8	5.7534		2.8	4.5629		2.8	3.7636		2.8	5.7679
	2.9	4.5264		2.9	5.69195		2.9	4.6878		2.9	3.92655		2.9	5.8226
	3	4.5919		3	5.5911		3	4.7857		3	3.8672		3	5.9343
	3.1	4.4047		3.1	5.57185		3.1	4.8886		3.1	3.99845		3.1	5.9473
	3.2	4.5117		3.2	5.5182		3.2	5.0169		3.2	3.823		3.2	6.0568
	3.3	4.4876		3.3	5.49745		3.3	4.8949		3.3	3.77805		3.3	5.9028
	3.4	4.5951		3.4	5.2553		3.4	5.1205		3.4	3.9037		3.4	5.9009
	3.5	4.4311		3.5	5.16125		3.5	5.1806		3.5	4.03555		3.5	5.8576
	3.6	4.4862		3.6	5.2037		3.6	5.2473		3.6	3.8744		3.6	5.7742
	3.7	4.3228		3.7	5.39225		3.7	5.1342		3.7	4.03145		3.7	5.8185
	3.8	4.2567		3.8	5.2366		3.8	4.9868		3.8	3.991		3.8	5.9116
	3.9	4.0253		3.9	5.00315		3.9	4.9283		3.9	4.24365		3.9	5.8758
	4	4.1738		4	5.3027		4	4.6113		4	4.3152		4	5.7116
	4.1	4.1908		4.1	5.34365		4.1	4.544		4.1	4.25665		4.1	5.8242
	4.2	3.9575		4.2	5.0975		4.2	4.5171		4.2	4.4298		4.2	5.7315
	4.3	3.9493		4.3	5.20655		4.3	4.487		4.3	4.45395		4.3	5.8568
	4.4	3.8559		4.4	5.3976		4.4	4.6703		4.4	4.287		4.4	5.8562
	4.5	3.5794		4.5	5.27605		4.5	4.3892		4.5	4.39375		4.5	5.7782
	4.6	3.4908		4.6	5.3448		4.6	4.4993		4.6	4.4943		4.6	5.8332
	4.7	3.571		4.7	5.22365		4.7	4.5622		4.7	4.31685		4.7	5.9477
	4.8	3.6576		4.8	5.0836		4.8	4.665		4.8	4.3553		4.8	5.9989
	4.9	3.482		4.9	5.10445		4.9	4.6896		4.9	4.48655		4.9	5.8465
	5	3.5554		5	5.0677		5	4.6047		5	4.7323		5	5.825
	5.1	3.4604		5.1	5.06105		5.1	4.4739		5.1	4.78165		5.1	5.678
	5.2	3.486		5.2	5.0127		5.2	4.229		5.2	4.7647		5.2	5.8045
	5.3	3.5948		5.3	4.98265		5.3	4.1583		5.3	4.72315		5.3	5.7905
	5.4	3.43		5.4	5.093		5.4	4.1882		5.4	4.6507		5.4	5.8645
	5.5	3.7037		5.5	4.84845		5.5	4.0399		5.5	4.78885		5.5	5.7377
	5.6	3.7045		5.6	4.9437		5.6	4.1209		5.6	5.0386		5.6	5.7298
	5.7	3.5253		5.7	4.80295		5.7	4.0908		5.7	5.14705		5.7	5.8505
	5.8	3.5995		5.8	4.9521		5.8	3.9341		5.8	5.251		5.8	5.7385
	5.9	3.5336		5.9	4.95415		5.9	3.8443		5.9	5.25285		5.9	5.726
	6	3.5271		6	4.6142		6	4.0035		6	5.3545		6	5.8225
	6.1	3.581		6.1	4.49515		6.1	3.8932		6.1	5.38135		6.1	6.0526
	6.2	3.47		6.2	4.6838		6.2	3.8327		6.2	5.3722		6.2	6.0281
	6.3	3.5264		6.3	4.53275		6.3	3.8896		6.3	5.28115		6.3	5.9651
	6.4	3.5058		6.4	4.4375		6.4	3.9793		6.4	5.0455		6.4	5.9015
	6.5	3.4667		6.5	4.50925		6.5	3.9703		6.5	5.08385		6.5	5.676
	6.6	3.5163		6.6	4.5641		6.6	3.8898		6.6	4.8746		6.6	5.783
	6.7	3.5145		6.7	4.54075		6.7	3.7963		6.7	4.75035		6.7	5.6541
	6.8	3.4016		6.8	4.6558		6.8	3.9132		6.8	5.0395		6.8	5.6219
	6.9	3.45		6.9	4.49405		6.9	3.8205		6.9	5.14915		6.9	5.7628
	7	3.6391		7	4.5662		7	3.861		7	5.1499		7	5.7049
	7.1	3.56		7.1	4.37345		7.1	3.8698		7.1	5.31975		7.1	5.5733
	7.2	3.4478		7.2	4.2988		7.2	3.8663		7.2	5.2133		7.2	5.6556
	7.3	3.5258		7.3	4.31125		7.3	4.0635		7.3	5.02715		7.3	5.6899
	7.4	3.5996		7.4	4.4305		7.4	4.131		7.4	5.0909		7.4	5.703
	7.5	3.6402		7.5	4.18545		7.5	4.0978		7.5	5.00585		7.5	5.6769
	7.6	3.6874		7.6	4.2444		7.6	4.1987		7.6	4.8719		7.6	6.0754
	7.7	3.6783		7.7	4.13305		7.7	3.9757		7.7	4.94095		7.7	6.031
	7.8	3.5691		7.8	4.2588		7.8	3.8375		7.8	5.0024		7.8	6.0559
	7.9	3.5665		7.9	4.39395		7.9	3.8861		7.9	4.93575		7.9	5.7839
	8	3.6656		8	4.3367		8	3.8851		8	4.875		8	5.8047
	8.1	3.347		8.1	4.33545		8.1	3.8483		8.1	4.86075		8.1	5.524
	8.2	3.472		8.2	4.0617		8.2	3.9493		8.2	5.114		8.2	5.452
	8.3	3.5706		8.3	4.02955		8.3	4.0008		8.3	5.17545		8.3	5.6903
	8.4	3.387		8.4	3.9066		8.4	3.8827		8.4	5.345		8.4	5.7308
	8.5	3.5125		8.5	3.71875		8.5	3.8202		8.5	5.29745		8.5	5.7146
	8.6	3.3182		8.6	3.7561		8.6	3.781		8.6	5.3628		8.6	5.5913
	8.7	3.3202		8.7	3.76905		8.7	3.6002		8.7	5.37915		8.7	5.6995
	8.8	3.284		8.8	3.8526		8.8	3.7004		8.8	5.351		8.8	5.7048
	8.9	3.1517		8.9	3.94915		8.9	3.736		8.9	5.31705		8.9	5.8687
	9	3.2396		9	3.7902		9	3.6445		9	5.4006		9	5.7507
	9.1	3.3024		9.1	3.84785		9.1	3.7045		9.1	5.52435		9.1	5.7486
	9.2	3.3344		9.2	3.7534		9.2	3.6447		9.2	5.5009		9.2	5.7624
	9.3	3.3178		9.3	3.71865		9.3	3.834		9.3	5.53115		9.3	5.8203
	9.4	3.2471		9.4	3.7228		9.4	3.8371		9.4	5.4059		9.4	5.8045
	9.5	3.1843		9.5	3.68895		9.5	3.8357		9.5	5.43935		9.5	5.626
	9.6	3.192		9.6	3.8679		9.6	3.9626		9.6	5.3927		9.6	5.4603
	9.7	3.331		9.7	3.85245		9.7	3.9182		9.7	5.34605		9.7	5.4433
	9.8	3.3992		9.8	3.9603		9.8	3.7995		9.8	5.3821		9.8	5.5114
	9.9	3.5507		9.9	3.90195		9.9	3.8421		9.9	5.36765		9.9	5.5191
	10	3.7935		10	3.6522		10	3.8088		10	5.2887		10	5.7346
	10.1	3.7342		10.1	3.61525		10.1	3.8768		10.1	5.72915		10.1	5.5626
	10.2	3.8422		10.2	3.6		10.2	4.1463		10.2	5.8858		10.2	5.5422
	10.3	3.9625		10.3	3.49905		10.3	4.0279		10.3	5.69695		10.3	5.5139
	10.4	3.9626		10.4	3.7156		10.4	3.7732		10.4	5.8983		10.4	5.548
	10.5	4.0545		10.5	3.80575		10.5	3.633		10.5	5.95075		10.5	5.7431
	10.6	4.0176		10.6	3.9162		10.6	3.6138		10.6	5.9192		10.6	5.6678
	10.7	3.85		10.7	3.78195		10.7	3.5324		10.7	5.77285		10.7	5.6917
	10.8	3.6461		10.8	3.9263		10.8	3.509		10.8	5.5322		10.8	5.6102
	10.9	3.4796		10.9	3.94465		10.9	3.5941		10.9	5.59955		10.9	5.6555
	11	3.4435		11	4.1079		11	3.4399		11	5.5315		11	5.5819
	11.1	3.5124		11.1	4.15115		11.1	3.5441		11.1	5.46135		11.1	5.5313
	11.2	3.2984		11.2	4.3481		11.2	3.4341		11.2	5.3817		11.2	5.4201
	11.3	3.3399		11.3	4.35945		11.3	3.5023		11.3	5.46545		11.3	5.5741
	11.4	3.4026		11.4	4.205		11.4	3.2772		11.4	5.5297		11.4	5.611
	11.5	3.5254		11.5	4.19565		11.5	3.3991		11.5	5.43195		11.5	5.43
	11.6	3.52		11.6	4.2453		11.6	3.3903		11.6	5.3151		11.6	5.3496
	11.7	3.4002		11.7	4.46995		11.7	3.4402		11.7	5.26235		11.7	5.4595
	11.8	3.4712		11.8	4.539		11.8	3.4927		11.8	5.2473		11.8	5.2511
	11.9	3.5169		11.9	4.40935		11.9	3.4262		11.9	5.22985		11.9	5.281
	12	3.4619		12	4.3275		12	3.3186		12	5.2912		12	5.2149
	12.1	3.3581		12.1	4.56545		12.1	3.4122		12.1	5.15155		12.1	5.303
	12.2	3.2983		12.2	4.6985		12.2	3.49		12.2	5.1273		12.2	5.3923
	12.3	3.2536		12.3	4.52915		12.3	3.5329		12.3	5.19995		12.3	5.3803
	12.4	3.3207		12.4	4.5155		12.4	3.6107		12.4	5.2036		12.4	5.3653
	12.5	3.2391		12.5	4.68435		12.5	3.5778		12.5	5.52745		12.5	5.1696
	12.6	3.093		12.6	4.7821		12.6	3.6658		12.6	5.5688		12.6	5.0903
	12.7	3.1123		12.7	4.95405		12.7	3.6323		12.7	5.37965		12.7	5.1591
	12.8	3.1497		12.8	4.8568		12.8	3.6124		12.8	5.3361		12.8	5.0887
	12.9	3.1558		12.9	4.93945		12.9	3.5089		12.9	5.29225		12.9	5.0456
	13	3.1718		13	4.9337		13	3.5187		13	5.287		13	5.2087
	13.1	3.1536		13.1	5.11155		13.1	3.5455		13.1	5.14145		13.1	5.238
	13.2	3.3198		13.2	5.0992		13.2	3.5627		13.2	5.0259		13.2	5.2719
	13.3	3.1928		13.3	5.12495		13.3	3.3085		13.3	5.00565		13.3	5.3383
	13.4	3.1479		13.4	5.1349		13.4	3.4901		13.4	4.9735		13.4	5.4436
	13.5	3.3246		13.5	5.22435		13.5	3.3648		13.5	5.11165		13.5	5.3989
	13.6	3.34		13.6	5.243		13.6	3.5321		13.6	5.3829		13.6	5.2815
	13.7	3.3656		13.7	5.16115		13.7	3.5188		13.7	5.18925		13.7	5.1479
	13.8	3.2148		13.8	5.2313		13.8	3.6014		13.8	5.2216		13.8	5.114
	13.9	3.0727		13.9	5.24535		13.9	3.6582		13.9	5.41505		13.9	4.9451
	14	3.3029		14	5.3832		14	3.4499		14	5.3719		14	5.0941
	14.1	3.2801		14.1	5.24255		14.1	3.4342		14.1	5.33205		14.1	4.9729
	14.2	3.1182		14.2	5.3192		14.2	3.4345		14.2	5.3194		14.2	4.7785
	14.3	3.2523		14.3	5.08025		14.3	3.4532		14.3	5.31365		14.3	4.7144
	14.4	3.1311		14.4	5.1617		14.4	3.4637		14.4	5.4116		14.4	4.5604
	14.5	3.2155		14.5	5.25945		14.5	3.5978		14.5	5.61395		14.5	4.6116
	14.6	3.2659		14.6	5.2603		14.6	3.6315		14.6	5.3218		14.6	4.5203
	14.7	3.0972		14.7	5.22305		14.7	3.4261		14.7	5.27335		14.7	4.7901
	14.8	3.04		14.8	5.1856		14.8	3.3813		14.8	5.2661		14.8	4.8789
	14.9	2.9945		14.9	5.27285		14.9	3.4979		14.9	5.30705		14.9	4.9924
	15	3.0661		15	5.2345		15	3.5488		15	5.2451		15	5.0875
	15.1	3.0165		15.1	5.04325		15.1	3.4606		15.1	5.20075		15.1	5.1272
	15.2	2.997		15.2	4.8701		15.2	3.5966		15.2	5.0509		15.2	5.2973
	15.3	3.0461		15.3	4.87625		15.3	3.6006		15.3	5.10525		15.3	5.3769
	15.4	3.1354		15.4	4.9081		15.4	3.4926		15.4	4.9901		15.4	5.2405
	15.5	3.1249		15.5	4.87265		15.5	3.5998		15.5	5.12895		15.5	5.1289
	15.6	3.1406		15.6	4.9037		15.6	3.6415		15.6	5.0336		15.6	5.0769
	15.7	3.1875		15.7	4.81895		15.7	3.7949		15.7	5.01685		15.7	5.1622
	15.8	3.0939		15.8	5.0158		15.8	3.9995		15.8	5.1028		15.8	5.118
	15.9	3.0406		15.9	5.05415		15.9	3.79		15.9	4.96435		15.9	5.2027
	16	2.8877		16	5.0858		16	3.7626		16	4.9409		16	5.1691
	16.1	3.0347		16.1	4.89115		16.1	3.6489		16.1	4.92065		16.1	4.9979
	16.2	3.0081		16.2	5.0483		16.2	3.6965		16.2	4.7566		16.2	4.9026
	16.3	2.894		16.3	5.08165		16.3	3.6402		16.3	4.81655		16.3	4.7814
	16.4	2.8827		16.4	5.0551		16.4	3.7139		16.4	4.8171		16.4	4.8836
	16.5	2.7392		16.5	4.99785		16.5	3.6732		16.5	4.65515		16.5	4.9363
	16.6	2.7237		16.6	4.9371		16.6	3.7152		16.6	4.7283		16.6	4.8851
	16.7	2.8176		16.7	4.93935		16.7	3.7702		16.7	4.56675		16.7	4.9382
	16.8	2.7247		16.8	4.9594		16.8	3.8881		16.8	4.4862		16.8	5.0272
	16.9	2.7732		16.9	4.82955		16.9	3.6404		16.9	4.42465		16.9	5.0611
	17	2.8188		17	4.9179		17	3.5263		17	4.2817		17	5.3533
	17.1	2.7555		17.1	5.03295		17.1	3.452		17.1	4.21905		17.1	5.2514
	17.2	2.7383		17.2	5.1733		17.2	3.455		17.2	4.2009		17.2	5.2893
	17.3	2.6961		17.3	5.06715		17.3	3.4402		17.3	4.36775		17.3	5.3643
	17.4	2.6784		17.4	4.8416		17.4	3.3821		17.4	4.3333		17.4	5.2245
	17.5	2.6485		17.5	4.75985		17.5	3.3491		17.5	4.32895		17.5	5.2542
	17.6	2.9013		17.6	4.6577		17.6	3.1751		17.6	4.3303		17.6	5.1351
	17.7	2.9056		17.7	4.54415		17.7	3.2006		17.7	4.45165		17.7	5.2065
	17.8	2.8056		17.8	4.5783		17.8	3.0764		17.8	4.4736		17.8	5.1007
	17.9	2.7581		17.9	4.60055		17.9	3.313		17.9	4.63955		17.9	4.9548
	18	2.6271		18	4.6493		18	3.4201		18	4.5642		18	4.7828
	18.1	2.5769		18.1	4.81755		18.1	3.2436		18.1	4.49695		18.1	4.6489
	18.2	2.5819		18.2	4.8955		18.2	3.2018		18.2	4.4036		18.2	4.5463
	18.3	2.4318		18.3	5.03195		18.3	3.2062		18.3	4.57325		18.3	4.6429
	18.4	2.5478		18.4	5.0156		18.4	3.2069		18.4	4.3771		18.4	4.7144
	18.5	2.5936		18.5	5.06665		18.5	3.2814		18.5	4.36295		18.5	4.6931
	18.6	2.505		18.6	5.113		18.6	3.43		18.6	4.5422		18.6	4.5407
	18.7	2.3821		18.7	5.14325		18.7	3.3974		18.7	4.64355		18.7	4.4001
	18.8	2.5082		18.8	5.1121		18.8	3.5213		18.8	4.6339		18.8	4.2909
	18.9	2.3519		18.9	5.06375		18.9	3.3672		18.9	4.69915		18.9	4.3334
	19	2.2481		19	5.0685		19	3.2388		19	4.8462		19	4.2694
	19.1	2.1605		19.1	4.98605		19.1	3.3198		19.1	4.91585		19.1	4.4213
	19.2	2.1194		19.2	5.0859		19.2	3.4283		19.2	4.9269		19.2	4.4366
	19.3	1.9973		19.3	5.15055		19.3	3.3203		19.3	5.06465		19.3	4.319
	19.4	2.0493		19.4	5.1316		19.4	3.3304		19.4	5.2116		19.4	4.2523
	19.5	2.0354		19.5	5.07395		19.5	3.4199		19.5	5.12375		19.5	4.3209
	19.6	2.0206		19.6	4.8879		19.6	3.3764		19.6	5.2419		19.6	4.2244
	19.7	2.0051		19.7	4.92835		19.7	3.2861		19.7	5.52805		19.7	4.0808
	19.8	2.0054		19.8	4.7619		19.8	3.3419		19.8	5.4054		19.8	4.0958
	19.9	2.031		19.9	4.81465		19.9	3.1876		19.9	5.69775		19.9	3.9785
	20	1.7718		20	4.6715		20	3.1549		20	5.7082		20	4.0974
	20.1	1.8822		20.1	4.81185		20.1	3.2031		20.1	5.74715		20.1	3.9921
	20.2	1.8403		20.2	4.805		20.2	3.2441		20.2	5.7312		20.2	3.8737
	20.3	1.7748		20.3	4.79685		20.3	3.3		20.3	5.83785		20.3	3.9106
	20.4	1.6531		20.4	4.8131		20.4	3.3043		20.4	6.1178		20.4	4.0281
	20.5	1.822		20.5	4.78715		20.5	3.3724		20.5	6.25125		20.5	3.9245
	20.6	1.7862		20.6	4.994		20.6	3.3358		20.6	6.0493		20.6	4.01
	20.7	1.8074		20.7	4.89465		20.7	3.4405		20.7	5.80045		20.7	3.9703
	20.8	1.8309		20.8	4.811		20.8	3.3979		20.8	5.9974		20.8	4.406
	20.9	1.8565		20.9	4.96335		20.9	3.4417		20.9	6.18575		20.9	4.6004
	21	1.828		21	5.084		21	3.3768		21	6.3238		21	4.35
	21.1	1.7371		21.1	5.03225		21.1	3.3712		21.1	6.45955		21.1	4.2865
	21.2	1.7531		21.2	4.9488		21.2	3.4389		21.2	6.4281		21.2	4.2462
	21.3	1.6442		21.3	5.00245		21.3	3.3511		21.3	6.50735		21.3	4.3286
	21.4	1.6223		21.4	5.0589		21.4	3.3917		21.4	6.3814		21.4	4.1312
	21.5	1.5592		21.5	5.05615		21.5	3.2743		21.5	6.22565		21.5	4.3014
	21.6	1.5395		21.6	5.0414		21.6	3.2887		21.6	6.5143		21.6	4.2337
	21.7	1.593		21.7	4.84755		21.7	3.4184		21.7	6.50475		21.7	4.1906
	21.8	1.6372		21.8	4.7348		21.8	3.4266		21.8	6.4851		21.8	4.0403
	21.9	1.5873		21.9	4.81665		21.9	3.4144		21.9	6.43155		21.9	4.1174
	22	1.7358		22	4.6391		22	3.3602		22	6.2135		22	4.1147
	22.1	1.6812		22.1	4.70405		22.1	3.3222		22.1	6.17575		22.1	4.3256
	22.2	1.6817		22.2	4.8224		22.2	3.324		22.2	5.8532		22.2	4.4876
	22.3	1.645		22.3	4.74315		22.3	3.3299		22.3	5.80455		22.3	4.3678
	22.4	1.6569		22.4	4.9426		22.4	3.2955		22.4	5.7315		22.4	4.467
	22.5	1.5739		22.5	5.03185		22.5	3.4203		22.5	5.80145		22.5	4.2846
	22.6	1.4098		22.6	4.9527		22.6	3.3304		22.6	5.7225		22.6	4.2852
	22.7	1.5242		22.7	4.86225		22.7	3.3855		22.7	5.63775		22.7	4.2285
	22.8	1.4757		22.8	5.0063		22.8	3.3635		22.8	5.6581		22.8	4.2562
	22.9	1.4768		22.9	4.85375		22.9	3.3182		22.9	5.96825		22.9	4.1244
	23	1.5102		23	5.1666		23	3.2681		23	5.7601		23	4.1826
	23.1	1.5582		23.1	5.00845		23.1	3.1633		23.1	5.59805		23.1	4.1703
	23.2	1.5558		23.2	5.1577		23.2	3.1894		23.2	5.6416		23.2	4.0736
	23.3	1.5215		23.3	5.06815		23.3	3.1433		23.3	5.69665		23.3	3.9407
	23.4	1.5763		23.4	5.1789		23.4	3.0916		23.4	5.5558		23.4	4.021
	23.5	1.5535		23.5	5.30555		23.5	3.0566		23.5	5.46515		23.5	4.0165
	23.6	1.3988		23.6	5.2432		23.6	2.999		23.6	5.3924		23.6	4.1037
	23.7	1.6404		23.7	5.15225		23.7	3.0692		23.7	5.32545		23.7	4.1201
	23.8	1.726		23.8	5.1384		23.8	3.0429		23.8	5.2143		23.8	4.1206
	23.9	1.7447		23.9	5.17515		23.9	3.0195		23.9	5.15105		23.9	4.1065
	24	1.7701		24	5.2223		24	2.9939		24	5.0477		24	4.3149
	24.1	1.7958		24.1	5.19055		24.1	3.0977		24.1	5.22595		24.1	4.4656
	24.2	1.7846		24.2	5.1206		24.2	3.0242		24.2	5.0652		24.2	4.4317
	24.3	1.7815		24.3	5.07245		24.3	3.0815		24.3	5.05695		24.3	4.6492
	24.4	1.6524		24.4	5.2027		24.4	3.053		24.4	5.0969		24.4	4.6841
	24.5	1.7073		24.5	5.19945		24.5	3.0965		24.5	5.21855		24.5	4.6481
	24.6	1.7987		24.6	5.2994		24.6	3.0948		24.6	5.2128		24.6	4.9205
	24.7	1.7956		24.7	5.25505		24.7	3.0803		24.7	5.38005		24.7	5.2358
	24.8	1.8194		24.8	5.0719		24.8	3.0925		24.8	5.2923		24.8	5.0649
	24.9	1.8465		24.9	5.03225		24.9	3.1416		24.9	5.33195		24.9	5.0799
	25	1.795		25	4.9987		25	3.0852		25	5.3298		25	5.1151
	25.1	1.7386		25.1	4.90795		25.1	3.1263		25.1	5.13745		25.1	4.9684
	25.2	1.7303		25.2	4.8691		25.2	3.175		25.2	5.1379		25.2	4.9006
	25.3	1.8473		25.3	4.59415		25.3	3.2932		25.3	5.27135		25.3	4.9465
	25.4	1.8509		25.4	4.6811		25.4	3.2672		25.4	5.2975		25.4	4.8196
	25.5	1.8239		25.5	4.52545		25.5	3.2072		25.5	5.39515		25.5	4.8183
	25.6	1.6937		25.6	4.2385		25.6	3.2332		25.6	5.357		25.6	4.8536
	25.7	1.7543		25.7	4.26485		25.7	3.2034		25.7	5.49975		25.7	5.0481
	25.8	1.7981		25.8	4.0954		25.8	3.1858		25.8	5.5183		25.8	5.0516
	25.9	1.8715		25.9	4.02585		25.9	3.233		25.9	5.65575		25.9	4.9344
	26	1.9135		26	4.0796		26	3.2382		26	5.5104		26	4.9721
	26.1	1.835		26.1	4.05935		26.1	3.1797		26.1	5.44285		26.1	5.0877
	26.2	1.8702		26.2	4.0435		26.2	3.242		26.2	5.22		26.2	4.9192
	26.3	1.7434		26.3	4.05545		26.3	3.1011		26.3	5.15945		26.3	4.9912
	26.4	1.8411		26.4	4.0892		26.4	3.0262		26.4	5.0581		26.4	4.7975
	26.5	1.9167		26.5	4.08645		26.5	3.0332		26.5	5.00315		26.5	4.8793
	26.6	1.8511		26.6	4.0452		26.6	3.1147		26.6	5.1178		26.6	4.75
	26.7	1.8578		26.7	4.11425		26.7	3.0634		26.7	5.22325		26.7	4.8199
	26.8	1.9097		26.8	4.0515		26.8	3.2289		26.8	4.9983		26.8	4.7054
	26.9	2.0704		26.9	3.90095		26.9	3.1351		26.9	4.94305		26.9	4.6595
	27	2.0519		27	3.8159		27	3.1643		27	4.7105		27	4.6746
	27.1	1.9175		27.1	3.67555		27.1	3.0322		27.1	4.60005		27.1	4.6775
	27.2	2.0153		27.2	3.5799		27.2	2.9872		27.2	4.6291		27.2	4.6655
	27.3	1.9815		27.3	3.63975		27.3	2.9871		27.3	4.66385		27.3	4.5211
	27.4	2.0482		27.4	3.6566		27.4	3.086		27.4	4.7982		27.4	4.6374
	27.5	1.9675		27.5	3.57605		27.5	2.9279		27.5	4.73615		27.5	4.5295
	27.6	1.9053		27.6	3.5755		27.6	2.99		27.6	4.601		27.6	4.56
	27.7	1.8834		27.7	3.77235		27.7	3.0299		27.7	4.60105		27.7	4.4416
	27.8	1.855		27.8	3.8257		27.8	2.9782		27.8	4.4786		27.8	4.4627
	27.9	1.8946		27.9	3.81545		27.9	2.9893		27.9	4.41885		27.9	4.3634
	28	1.8259		28	3.6156		28	3.085		28	4.3842		28	4.1301
	28.1	2.0268		28.1	3.76395		28.1	3.0561		28.1	4.31515		28.1	4.2604
	28.2	1.9411		28.2	3.8785		28.2	3.0083		28.2	4.2447		28.2	4.3356
	28.3	1.827		28.3	3.99715		28.3	3.088		28.3	4.34475		28.3	4.3891
	28.4	1.7918		28.4	3.9529		28.4	2.9504		28.4	4.4472		28.4	4.291
	28.5	1.8924		28.5	3.98265		28.5	2.9874		28.5	4.63555		28.5	4.2105
	28.6	2.0614		28.6	3.9607		28.6	2.9753		28.6	4.5992		28.6	4.0564
	28.7	2.0539		28.7	3.98525		28.7	3.0307		28.7	4.57265		28.7	3.9458
	28.8	2.0006		28.8	4.0697		28.8	3.1454		28.8	4.3194		28.8	3.9943
	28.9	1.8714		28.9	3.89485		28.9	3.1147		28.9	4.17265		28.9	3.9358
	29	1.8525		29	3.8466		29	2.976		29	4.1282		29	4.0065
	29.1	1.9036		29.1	3.86625		29.1	3.0269		29.1	4.10635		29.1	3.9789
	29.2	1.8787		29.2	3.8051		29.2	3.1685		29.2	4.2463		29.2	4.1277
	29.3	1.8297		29.3	3.64375		29.3	3.2117		29.3	4.31755		29.3	4.1708
	29.4	1.8607		29.4	3.6035		29.4	3.045		29.4	4.1953		29.4	4.2465
	29.5	1.8905		29.5	3.54415		29.5	3.1142		29.5	4.16365		29.5	4.2218
	29.6	1.8907		29.6	3.6184		29.6	3.1941		29.6	4.0247		29.6	4.089
	29.7	2.0619		29.7	3.51935		29.7	3.1261		29.7	4.10965		29.7	4.1921
	29.8	2.0407		29.8	3.5366		29.8	3.0391		29.8	3.9537		29.8	4.0595
	29.9	2.0818		29.9	3.65095		29.9	3.1142		29.9	3.88275		29.9	4.1287
	30	1.8924		30	3.5699		30	3.0942		30	3.8066		30	3.9663
	30.1	2.1355		30.1	3.68385		30.1	3.0014		30.1	3.92035		30.1	3.9231
	30.2	2.0797		30.2	3.8957		30.2	2.9696		30.2	4.1746		30.2	3.7663
	30.3	2.0336		30.3	3.83365		30.3	3.081		30.3	4.12665		30.3	3.7732
	30.4	1.9956		30.4	3.9384		30.4	3.0444		30.4	4.059		30.4	3.6376
	30.5	1.9725		30.5	4.05195		30.5	3.1403		30.5	4.15615		30.5	3.6523
	30.6	1.9526		30.6	4.1011		30.6	3.0236		30.6	4.1318		30.6	3.7849
	30.7	1.9315		30.7	4.23385		30.7	3.136		30.7	4.28385		30.7	3.7401
	30.8	1.8711		30.8	4.243		30.8	3.0864		30.8	4.251		30.8	3.6671
	30.9	1.9536		30.9	3.99985		30.9	3.1728		30.9	4.20725		30.9	3.7866
	31	1.8752		31	3.9143		31	3.0855		31	4.0921		31	3.6519
	31.1	1.963		31.1	3.91885		31.1	3.1129		31.1	4.08905		31.1	3.6243
	31.2	1.9073		31.2	3.9907		31.2	3.1434		31.2	4.1029		31.2	3.8243
	31.3	1.9304		31.3	3.86505		31.3	3.0213		31.3	4.21755		31.3	3.8472
	31.4	1.9293		31.4	3.8647		31.4	3.049		31.4	4.0883		31.4	3.7965
	31.5	1.9363		31.5	3.74915		31.5	3.0833		31.5	4.13265		31.5	3.9398
	31.6	1.9933		31.6	3.6929		31.6	3.1061		31.6	4.1509		31.6	3.749
	31.7	1.8689		31.7	3.63115		31.7	3.1202		31.7	4.11995		31.7	3.6076
	31.8	1.9007		31.8	3.8524		31.8	3.2503		31.8	4.0436		31.8	3.8088
	31.9	1.8532		31.9	3.76555		31.9	3.2389		31.9	3.95035		31.9	3.8433
	32	1.8838		32	3.7806		32	3.1523		32	4.0008		32	3.5771
	32.1	1.8507		32.1	3.78675		32.1	3.3243		32.1	4.16275		32.1	3.4452
	32.2	1.8705		32.2	3.8137		32.2	3.2594		32.2	4.1022		32.2	3.5814
	32.3	1.8828		32.3	3.83155		32.3	3.1761		32.3	4.05925		32.3	3.5093
	32.4	1.7988		32.4	4.0809		32.4	3.3656		32.4	3.9563		32.4	3.5916
	32.5	1.8787		32.5	4.05385		32.5	3.382		32.5	3.94195		32.5	3.5372
	32.6	1.937		32.6	4.1617		32.6	3.3968		32.6	3.9059		32.6	3.8365
	32.7	1.8829		32.7	4.13735		32.7	3.2358		32.7	3.88305		32.7	3.9748
	32.8	1.7844		32.8	4.29		32.8	3.3079		32.8	3.7627		32.8	3.9214
	32.9	1.8267		32.9	4.30465		32.9	3.3372		32.9	3.70035		32.9	4.1334
	33	1.8378		33	4.2797		33	3.3231		33	3.6882		33	4.1614
	33.1	1.855		33.1	4.38685		33.1	3.2139		33.1	3.86975		33.1	4.2774
	33.2	1.9578		33.2	4.5678		33.2	3.1595		33.2	3.9039		33.2	4.1345
	33.3	1.8525		33.3	4.34105		33.3	3.1671		33.3	3.89915		33.3	3.9537
	33.4	1.9907		33.4	4.5446		33.4	3.0497		33.4	3.7669		33.4	3.9168
	33.5	1.829		33.5	4.36705		33.5	3.2146		33.5	3.69945		33.5	3.9658
	33.6	1.9298		33.6	4.4717		33.6	3.0717		33.6	3.811		33.6	4.1724
	33.7	1.8329		33.7	4.51605		33.7	3.0291		33.7	3.68245		33.7	4.2918
	33.8	1.7896		33.8	4.5811		33.8	3.0355		33.8	3.6874		33.8	4.2827
	33.9	1.8069		33.9	4.60565		33.9	3.0387		33.9	3.75165		33.9	4.1116
	34	1.748		34	4.8424		34	3.0128		34	3.722		34	4.1386
	34.1	1.7064		34.1	4.88055		34.1	3.0187		34.1	3.92985		34.1	4.1691
	34.2	1.7044		34.2	4.7695		34.2	3.0312		34.2	4.1245		34.2	4.1518
	34.3	1.6655		34.3	4.73485		34.3	3.0829		34.3	4.06705		34.3	4.2707
	34.4	1.6702		34.4	4.6533		34.4	2.9121		34.4	4.1236		34.4	4.2471
	34.5	1.7145		34.5	4.50955		34.5	3.1379		34.5	4.07305		34.5	4.128
	34.6	1.8259		34.6	4.7515		34.6	3.0598		34.6	3.9911		34.6	4.2188
	34.7	1.7637		34.7	4.74235		34.7	3.12		34.7	4.00305		34.7	4.3653
	34.8	1.7322		34.8	4.6156		34.8	3.0472		34.8	3.9484		34.8	4.5004
	34.9	1.6808		34.9	4.98265		34.9	3.1443		34.9	3.69875		34.9	4.4074
	35	1.6051		35	4.9078		35	3.0337		35	3.5908		35	4.4915
	35.1	1.5592		35.1	4.75805		35.1	3.1342		35.1	3.69905		35.1	4.4144
	35.2	1.6249		35.2	4.8179		35.2	3.1017		35.2	3.6875		35.2	4.3984
	35.3	1.6919		35.3	4.87095		35.3	3.1346		35.3	3.71695		35.3	4.4133
	35.4	1.7545		35.4	4.593		35.4	3.1276		35.4	3.6469		35.4	4.4168
	35.5	1.8005		35.5	4.46075		35.5	3.2809		35.5	3.70005		35.5	4.5866
	35.6	1.6309		35.6	4.4831		35.6	3.3017		35.6	3.6445		35.6	4.3665
	35.7	1.6111		35.7	4.58815		35.7	3.1864		35.7	3.69845		35.7	4.3578
	35.8	1.6086		35.8	4.5353		35.8	3.0773		35.8	3.5571		35.8	4.0676
	35.9	1.5554		35.9	4.67455		35.9	3.0752		35.9	3.57385		35.9	4.1896
	36	1.6057		36	4.8762		36	2.9777		36	3.6963		36	4.4062
	36.1	1.6375		36.1	4.63745		36.1	3.0231		36.1	3.71055		36.1	4.2057
	36.2	1.6661		36.2	4.9366		36.2	3.0611		36.2	3.5974		36.2	4.1134
	36.3	1.6781		36.3	5.09515		36.3	2.9822		36.3	3.48935		36.3	4.1454
	36.4	1.8194		36.4	4.9558		36.4	3.1355		36.4	3.8495		36.4	4.28
	36.5	1.8833		36.5	4.94005		36.5	3.1309		36.5	3.75485		36.5	4.0935
	36.6	1.8669		36.6	5.1783		36.6	3.1865		36.6	3.7335		36.6	4.0107
	36.7	1.8326		36.7	5.21685		36.7	3.1529		36.7	3.75975		36.7	4.2492
	36.8	1.6844		36.8	5.2414		36.8	3.2224		36.8	3.6322		36.8	4.1554
	36.9	1.8674		36.9	5.13295		36.9	3.1705		36.9	3.73935		36.9	4.1681
	37	1.7696		37	5.1438		37	3.1694		37	3.7268		37	4.0858
	37.1	1.7443		37.1	5.14555		37.1	3.1389		37.1	3.83485		37.1	4.1652
	37.2	1.727		37.2	5.0021		37.2	3.0059		37.2	3.8504		37.2	4.2396
	37.3	1.6813		37.3	4.91275		37.3	3.1401		37.3	4.20945		37.3	4.3588
	37.4	1.773		37.4	5.1635		37.4	3.0348		37.4	4.1522		37.4	4.3655
	37.5	1.7914		37.5	5.17785		37.5	3.0664		37.5	4.17095		37.5	4.3978
	37.6	1.7209		37.6	5.1609		37.6	3.1549		37.6	4.0486		37.6	4.3449
	37.7	1.7238		37.7	5.19185		37.7	3.0138		37.7	4.08825		37.7	4.4486
	37.8	1.772		37.8	5.2743		37.8	3.1297		37.8	4.131		37.8	4.435
	37.9	1.7887		37.9	5.35915		37.9	3.1111		37.9	4.03445		37.9	4.4725
	38	1.6853		38	5.2107		38	3.1824		38	4.1638		38	4.3723
	38.1	1.6029		38.1	5.24155		38.1	3.2479		38.1	3.90665		38.1	4.3195
	38.2	1.7325		38.2	5.2206		38.2	3.2673		38.2	3.8068		38.2	4.1062
	38.3	1.7625		38.3	5.07815		38.3	3.1085		38.3	3.77575		38.3	4.0648
	38.4	1.7833		38.4	5.1521		38.4	3.069		38.4	3.9528		38.4	4.0417
	38.5	1.8388		38.5	5.16545		38.5	3.0066		38.5	3.86535		38.5	4.0979
	38.6	1.7704		38.6	4.9089		38.6	2.8797		38.6	3.6777		38.6	4.0522
	38.7	1.8629		38.7	4.97765		38.7	2.9741		38.7	3.86305		38.7	4.1165
	38.8	1.9636		38.8	4.9554		38.8	2.9128		38.8	3.905		38.8	4.1054
	38.9	1.7865		38.9	4.90785		38.9	2.8752		38.9	3.84345		38.9	4.2149
	39	1.8049		39	4.8148		39	2.8674		39	3.9444		39	4.118
	39.1	1.801		39.1	4.92645		39.1	2.9547		39.1	3.93795		39.1	4.2098
	39.2	1.8084		39.2	4.9122		39.2	2.8209		39.2	3.8269		39.2	4.3295
	39.3	1.759		39.3	4.75655		39.3	2.7531		39.3	4.08405		39.3	3.9982
	39.4	1.9483		39.4	4.8097		39.4	2.6567		39.4	4.0106		39.4	3.8965
	39.5	1.8164		39.5	4.76915		39.5	2.6771		39.5	4.14235		39.5	3.6632
	39.6	1.8106		39.6	4.6637		39.6	2.5047		39.6	4.23		39.6	3.554
	39.7	1.7291		39.7	4.59295		39.7	2.7015		39.7	4.23435		39.7	3.5447
	39.8	1.7066		39.8	4.555		39.8	2.6965		39.8	4.1268		39.8	3.4542
	39.9	1.6558		39.9	4.62315		39.9	2.6708		39.9	4.19655		39.9	3.5595
	40	1.778		40	4.5801		40	2.5385		40	4.3222		40	3.581
	40.1	1.8158		40.1	4.43025		40.1	2.547		40.1	4.26465		40.1	3.7018
	40.2	1.8267		40.2	4.4127		40.2	2.4923		40.2	4.1803		40.2	3.7949
	40.3	1.6294		40.3	4.47395		40.3	2.5453		40.3	4.23645		40.3	3.7332
	40.4	1.7791		40.4	4.4361		40.4	2.5076		40.4	4.2459		40.4	3.5828
	40.5	1.7655		40.5	4.53375		40.5	2.3907		40.5	4.38225		40.5	3.7277
	40.6	1.7205		40.6	4.5978		40.6	2.4743		40.6	4.4448		40.6	3.7546
	40.7	1.7973		40.7	4.69965		40.7	2.3905		40.7	4.59665		40.7	3.6238
	40.8	1.7964		40.8	4.8939		40.8	2.462		40.8	4.4571		40.8	3.7174
	40.9	1.8616		40.9	4.90025		40.9	2.4438		40.9	4.45135		40.9	3.7356
	41	1.7908		41	4.8027		41	2.4241		41	4.4065		41	3.5482
	41.1	1.7186		41.1	4.92325		41.1	2.5136		41.1	4.46675		41.1	3.4156
	41.2	1.7402		41.2	4.7734		41.2	2.4272		41.2	4.271		41.2	3.5557
	41.3	1.7982		41.3	4.69035		41.3	2.5915		41.3	4.25745		41.3	3.5142
	41.4	1.874		41.4	4.7302		41.4	2.5715		41.4	4.3466		41.4	3.4271
	41.5	1.6796		41.5	4.67575		41.5	2.6305		41.5	4.60305		41.5	3.3732
	41.6	1.6964		41.6	4.5321		41.6	2.5093		41.6	4.6763		41.6	3.3144
	41.7	1.7339		41.7	4.52365		41.7	2.4083		41.7	4.49465		41.7	3.3908
	41.8	1.9326		41.8	4.704		41.8	2.3476		41.8	4.4012		41.8	3.5259
	41.9	1.7547		41.9	4.66655		41.9	2.2826		41.9	4.14545		41.9	3.5765
	42	1.6237		42	4.6749		42	2.254		42	4.1768		42	3.4634
	42.1	1.5587		42.1	4.64795		42.1	2.2428		42.1	4.16395		42.1	3.4866
	42.2	1.5949		42.2	4.7447		42.2	2.2462		42.2	3.9602		42.2	3.4381
	42.3	1.6555		42.3	4.79655		42.3	2.2295		42.3	4.01625		42.3	3.3777
	42.4	1.7852		42.4	4.7268		42.4	2.2109		42.4	4.0856		42.4	3.5029
	42.5	1.683		42.5	4.45775		42.5	2.2591		42.5	4.12115		42.5	3.5039
	42.6	1.6233		42.6	4.3629		42.6	2.1772		42.6	4.2443		42.6	3.4683
	42.7	1.6136		42.7	4.30775		42.7	2.0055		42.7	4.16995		42.7	3.4806
	42.8	1.5433		42.8	4.4442		42.8	2.0846		42.8	4.4307		42.8	3.4965
	42.9	1.4324		42.9	4.38215		42.9	2.2269		42.9	4.47035		42.9	3.676
	43	1.4313		43	4.2285		43	2.3152		43	4.4688		43	3.4607
	43.1	1.4623		43.1	4.21195		43.1	2.1276		43.1	4.41345		43.1	3.4653
	43.2	1.4271		43.2	4.1228		43.2	2.1284		43.2	4.6528		43.2	3.5789
	43.3	1.4695		43.3	4.10455		43.3	2.2638		43.3	4.48795		43.3	3.7668
	43.4	1.5145		43.4	4.2485		43.4	2.2829		43.4	4.6767		43.4	3.693
	43.5	1.3835		43.5	4.36485		43.5	2.2093		43.5	4.73575		43.5	3.7316
	43.6	1.5155		43.6	4.3983		43.6	2.0935		43.6	4.669		43.6	3.5996
	43.7	1.6713		43.7	4.45545		43.7	2.0591		43.7	4.77375		43.7	3.6188
	43.8	1.5558		43.8	4.3986		43.8	2.1014		43.8	4.7248		43.8	3.5049
	43.9	1.5525		43.9	4.20975		43.9	2.0493		43.9	4.62145		43.9	3.6007
	44	1.5799		44	4.1262		44	2.1494		44	4.6449		44	3.5199
	44.1	1.4436		44.1	4.17205		44.1	2.0828		44.1	4.54065		44.1	3.6626
	44.2	1.4097		44.2	4.3456		44.2	2.033		44.2	4.5663		44.2	3.6749
	44.3	1.4767		44.3	4.33485		44.3	2.0463		44.3	4.44585		44.3	3.5273
	44.4	1.4531		44.4	4.3083		44.4	2.0293		44.4	4.4681		44.4	3.5821
	44.5	1.3625		44.5	4.35365		44.5	2.1301		44.5	4.50625		44.5	3.3783
	44.6	1.3828		44.6	4.3993		44.6	2.0241		44.6	4.6222		44.6	3.316
	44.7	1.3554		44.7	4.61275		44.7	1.9831		44.7	4.47235		44.7	3.2636
	44.8	1.4206		44.8	4.6962		44.8	2.0824		44.8	4.3641		44.8	3.2934
	44.9	1.3972		44.9	4.59905		44.9	2.0919		44.9	4.32675		44.9	3.2643
	45	1.3851		45	4.5034		45	2.0988		45	4.3055		45	3.3202
	45.1	1.3727		45.1	4.49575		45.1	2.1148		45.1	4.38645		45.1	3.1755
	45.2	1.3511		45.2	4.4169		45.2	2.0786		45.2	4.3864		45.2	3.292
	45.3	1.4012		45.3	4.44545		45.3	2.0604		45.3	4.09455		45.3	3.3258
	45.4	1.3554		45.4	4.3366		45.4	2.1906		45.4	4.3013		45.4	3.4315
	45.5	1.3092		45.5	4.26055		45.5	2.1037		45.5	4.32105		45.5	3.4899
	45.6	1.3301		45.6	3.9044		45.6	2.2514		45.6	4.2876		45.6	3.4357
	45.7	1.4705		45.7	3.85495		45.7	2.1877		45.7	4.06025		45.7	3.4042
	45.8	1.2661		45.8	4.0165		45.8	2.2392		45.8	4.0691		45.8	3.2553
	45.9	1.3316		45.9	3.91085		45.9	2.1775		45.9	4.17205		45.9	3.1677
	46	1.3483		46	3.8965		46	2.2235		46	4.011		46	3.2301
	46.1	1.4552		46.1	3.89635		46.1	2.254		46.1	4.03495		46.1	3.1967
	46.2	1.4089		46.2	3.8444		46.2	2.1984		46.2	3.9725		46.2	3.1679
	46.3	1.3576		46.3	3.59265		46.3	2.0555		46.3	3.99065		46.3	3.1166
	46.4	1.383		46.4	3.8207		46.4	2.164		46.4	3.9654		46.4	3.1275
	46.5	1.4599		46.5	3.60265		46.5	2.0697		46.5	3.95025		46.5	3.1067
	46.6	1.3065		46.6	3.6768		46.6	2.1189		46.6	4.0141		46.6	3.0721
	46.7	1.3536		46.7	3.53215		46.7	2.1878		46.7	3.91345		46.7	3.1808
	46.8	1.4178		46.8	3.7107		46.8	2.1538		46.8	4.0012		46.8	3.0147
	46.9	1.4088		46.9	3.76715		46.9	2.1456		46.9	3.83845		46.9	3.0793
	47	1.3406		47	3.7583		47	2.168		47	3.8445		47	3.2012
	47.1	1.244		47.1	4.10545		47.1	2.1377		47.1	3.83345		47.1	3.1619
	47.2	1.2931		47.2	4.0276		47.2	2.2803		47.2	3.9267		47.2	3.32
	47.3	1.3871		47.3	4.05025		47.3	2.1747		47.3	3.97185		47.3	3.4732
	47.4	1.4181		47.4	3.9329		47.4	2.217		47.4	3.923		47.4	3.3109
	47.5	1.3041		47.5	3.96385		47.5	2.3455		47.5	3.99775		47.5	3.307
	47.6	1.3736		47.6	3.813		47.6	2.3687		47.6	3.8162		47.6	3.4458
	47.7	1.4718		47.7	3.73305		47.7	2.2127		47.7	3.81735		47.7	3.3861
	47.8	1.4485		47.8	3.7109		47.8	2.11		47.8	3.7902		47.8	3.5083
	47.9	1.4125		47.9	3.72395		47.9	2.1302		47.9	3.97855		47.9	3.4166
	48	1.4594		48	3.8327		48	2.0548		48	4.0142		48	3.3585
	48.1	1.5382		48.1	3.84985		48.1	2.0841		48.1	3.81505		48.1	3.3235
	48.2	1.4374		48.2	3.8128		48.2	2.0326		48.2	3.966		48.2	3.3046
	48.3	1.5666		48.3	3.83565		48.3	1.9609		48.3	3.88995		48.3	3.204
	48.4	1.5225		48.4	3.6936		48.4	2.0159		48.4	3.989		48.4	3.1669
	48.5	1.3681		48.5	3.66275		48.5	1.9462		48.5	4.06115		48.5	3.1194
	48.6	1.3198		48.6	3.5352		48.6	1.8802		48.6	4.2269		48.6	3.0246
	48.7	1.3157		48.7	3.48005		48.7	1.8918		48.7	4.09525		48.7	3.1242
	48.8	1.4962		48.8	3.3432		48.8	1.9868		48.8	4.1131		48.8	3.1275
	48.9	1.4045		48.9	3.53445		48.9	1.9136		48.9	4.11235		48.9	2.9587
	49	1.3		49	3.5256		49	1.9239		49	4.022		49	3.056
	49.1	1.3498		49.1	3.35995		49.1	1.8647		49.1	4.04895		49.1	3.1484
	49.2	1.3077		49.2	3.289		49.2	1.8304		49.2	4.0062		49.2	3.0729
	49.3	1.3372		49.3	3.37005		49.3	1.9149		49.3	3.83635		49.3	3.0302
	49.4	1.336		49.4	3.3073		49.4	1.978		49.4	3.7494		49.4	3.1759
	49.5	1.4322		49.5	3.42415		49.5	1.8666		49.5	3.55775		49.5	3.2015
	49.6	1.4944		49.6	3.4242		49.6	1.8799		49.6	3.5054		49.6	3.2042
	49.7	1.492		49.7	3.21605		49.7	1.8753		49.7	3.38875		49.7	3.0859
	49.8	1.3397		49.8	3.2015		49.8	1.8219		49.8	3.4121		49.8	2.9784
	49.9	1.4932		49.9	3.22855		49.9	1.8305		49.9	3.27795		49.9	3.1292
	50	1.3735		50	3.2928		50	1.8744		50	3.3961		50	3.1984
	50.1	1.3488		50.1	3.17315		50.1	1.8669		50.1	3.62425		50.1	3.098
	50.2	1.4772		50.2	3.318		50.2	1.894		50.2	3.7062		50.2	3.2171
	50.3	1.4151		50.3	3.48195		50.3	1.9186		50.3	3.76965		50.3	3.2717
	50.4	1.4543		50.4	3.5978		50.4	1.9428		50.4	3.6792		50.4	3.2586
	50.5	1.3429		50.5	3.58335		50.5	1.9792		50.5	3.58645		50.5	3.3558
	50.6	1.3418		50.6	3.4987		50.6	2.0279		50.6	3.4745		50.6	3.3507
	50.7	1.3464		50.7	3.32705		50.7	1.9697		50.7	3.51585		50.7	3.3491
	50.8	1.3158		50.8	3.4525		50.8	2.0093		50.8	3.5064		50.8	3.3142
	50.9	1.3063		50.9	3.55275		50.9	1.9384		50.9	3.44465		50.9	3.3258
	51	1.3723		51	3.4137		51	1.9161		51	3.5169		51	3.5481
	51.1	1.3605		51.1	3.45465		51.1	1.8759		51.1	3.50515		51.1	3.6368
	51.2	1.305		51.2	3.7441		51.2	1.8624		51.2	3.5893		51.2	3.5638
	51.3	1.393		51.3	3.78235		51.3	1.7835		51.3	3.51395		51.3	3.5483
	51.4	1.3835		51.4	3.781		51.4	1.7063		51.4	3.5129		51.4	3.5519
	51.5	1.2883		51.5	3.56155		51.5	1.7473		51.5	3.47905		51.5	3.5005
	51.6	1.3224		51.6	3.7287		51.6	1.8321		51.6	3.5597		51.6	3.4801
	51.7	1.3027		51.7	3.72245		51.7	1.8949		51.7	3.48455		51.7	3.3489
	51.8	1.3731		51.8	3.6742		51.8	1.8807		51.8	3.3598		51.8	3.4875
	51.9	1.4321		51.9	3.73895		51.9	1.8544		51.9	3.51295		51.9	3.3616
	52	1.3202		52	3.5937		52	1.8325		52	3.4565		52	3.3447
	52.1	1.4037		52.1	3.68275		52.1	1.9061		52.1	3.40965		52.1	3.2911
	52.2	1.3814		52.2	3.6698		52.2	1.8027		52.2	3.4455		52.2	3.3099
	52.3	1.3479		52.3	3.61345		52.3	1.8979		52.3	3.55705		52.3	3.2774
	52.4	1.4235		52.4	3.5142		52.4	1.8857		52.4	3.5658		52.4	3.2074
	52.5	1.4826		52.5	3.73345		52.5	1.8077		52.5	3.61215		52.5	3.1215
	52.6	1.3695		52.6	3.7669		52.6	1.8307		52.6	3.5062		52.6	3.2201
	52.7	1.4148		52.7	3.72685		52.7	1.765		52.7	3.53515		52.7	3.2773
	52.8	1.3811		52.8	3.7661		52.8	1.7544		52.8	3.4536		52.8	3.3224
	52.9	1.41		52.9	3.85985		52.9	1.7949		52.9	3.37735		52.9	3.2163
	53	1.4107		53	3.7915		53	1.8428		53	3.5192		53	3.2221
	53.1	1.4175		53.1	3.80685		53.1	1.8029		53.1	3.47525		53.1	3.1333
	53.2	1.4157		53.2	3.8256		53.2	1.9293		53.2	3.7446		53.2	3.1675
	53.3	1.4616		53.3	3.83835		53.3	1.9091		53.3	3.66525		53.3	3.1843
	53.4	1.5096		53.4	3.8978		53.4	1.8864		53.4	3.4517		53.4	3.042
	53.5	1.4061		53.5	3.80315		53.5	1.8549		53.5	3.45155		53.5	3.0263
	53.6	1.351		53.6	3.7696		53.6	1.9149		53.6	3.428		53.6	3.0386
	53.7	1.2132		53.7	3.63455		53.7	2.0203		53.7	3.57375		53.7	2.9976
	53.8	1.38		53.8	3.5472		53.8	1.9773		53.8	3.2456		53.8	3.2117
	53.9	1.2411		53.9	3.59815		53.9	1.934		53.9	3.44465		53.9	3.2407
	54	1.1931		54	3.8021		54	1.847		54	3.3976		54	3.0712
	54.1	1.229		54.1	3.92645		54.1	1.9293		54.1	3.56545		54.1	3.305
	54.2	1.1795		54.2	3.7688		54.2	1.9656		54.2	3.6336		54.2	3.3622
	54.3	1.1941		54.3	3.81455		54.3	1.983		54.3	3.68635		54.3	3.1905
	54.4	1.1852		54.4	3.9194		54.4	1.8961		54.4	3.7092		54.4	3.1565
	54.5	1.1552		54.5	3.87405		54.5	1.8723		54.5	3.68205		54.5	3.1725
	54.6	1.0927		54.6	4.0788		54.6	1.7214		54.6	3.4583		54.6	3.3217
	54.7	1.1386		54.7	4.04495		54.7	1.6942		54.7	3.54085		54.7	3.2753
	54.8	1.1608		54.8	3.9166		54.8	1.7515		54.8	3.5894		54.8	3.2853
	54.9	1.1682		54.9	3.82105		54.9	1.8318		54.9	3.72095		54.9	3.2971
	55	1.0802		55	3.8598		55	1.9312		55	3.6949		55	3.1872
	55.1	1.13		55.1	3.80265		55.1	1.9155		55.1	3.66375		55.1	3.2505
	55.2	1.0687		55.2	3.6449		55.2	1.9816		55.2	3.4162		55.2	3.2392
	55.3	1.115		55.3	3.58195		55.3	2.0298		55.3	3.60795		55.3	3.1829
	55.4	1.1949		55.4	3.6043		55.4	1.8904		55.4	3.5607		55.4	3.2868
	55.5	1.2271		55.5	3.48955		55.5	1.8601		55.5	3.57695		55.5	3.3137
	55.6	1.1383		55.6	3.487		55.6	1.9436		55.6	3.5586		55.6	3.3329
	55.7	1.0762		55.7	3.55555		55.7	1.8976		55.7	3.43765		55.7	3.3077
	55.8	1.066		55.8	3.5651		55.8	1.8538		55.8	3.3138		55.8	3.3047
	55.9	1.101		55.9	3.62145		55.9	1.788		55.9	3.30525		55.9	3.2866
	56	1.2056		56	3.6238		56	1.7323		56	3.2859		56	3.2515
	56.1	1.1775		56.1	3.54765		56.1	1.7152		56.1	3.19945		56.1	3.2085
	56.2	1.3211		56.2	3.6023		56.2	1.7387		56.2	3.3315		56.2	3.1912
	56.3	1.4985		56.3	3.58365		56.3	1.8228		56.3	3.41705		56.3	3.1564
	56.4	1.2981		56.4	3.534		56.4	1.7857		56.4	3.746		56.4	3.1142
	56.5	1.3519		56.5	3.34575		56.5	1.9105		56.5	3.54685		56.5	3.1775
	56.6	1.3128		56.6	3.5875		56.6	1.8856		56.6	3.4891		56.6	3.0349
	56.7	1.2616		56.7	3.53875		56.7	1.6594		56.7	3.47215		56.7	3.0213
	56.8	1.2833		56.8	3.5308		56.8	1.8408		56.8	3.392		56.8	3.2025
	56.9	1.2914		56.9	3.61585		56.9	1.8608		56.9	3.30085		56.9	3.234
	57	1.2103		57	3.4917		57	1.8517		57	3.4607		57	3.3109
	57.1	1.1265		57.1	3.59905		57.1	1.8181		57.1	3.46635		57.1	3.211
	57.2	1.2315		57.2	3.6268		57.2	1.8441		57.2	3.5114		57.2	3.3256
	57.3	1.2919		57.3	3.63265		57.3	1.8778		57.3	3.37295		57.3	3.3093
	57.4	1.255		57.4	3.6284		57.4	1.9419		57.4	3.3192		57.4	3.3202
	57.5	1.252		57.5	3.71435		57.5	2.0515		57.5	3.30665		57.5	3.3612
	57.6	1.2267		57.6	3.7459		57.6	1.8859		57.6	3.3377		57.6	3.2528
	57.7	1.1771		57.7	3.70395		57.7	1.8937		57.7	3.18745		57.7	3.2769
	57.8	1.1889		57.8	3.5677		57.8	1.675		57.8	3.2826		57.8	3.1919
	57.9	1.1591		57.9	3.53905		57.9	1.659		57.9	3.45315		57.9	3.1756
	58	1.1277		58	3.3753		58	1.7337		58	3.3161		58	3.2165
	58.1	1.1592		58.1	3.42065		58.1	1.716		58.1	3.34955		58.1	3.2424
	58.2	1.1016		58.2	3.5072		58.2	1.6401		58.2	3.3235		58.2	3.2442
	58.3	1.1053		58.3	3.38375		58.3	1.8027		58.3	3.29605		58.3	3.274
	58.4	1.1052		58.4	3.3447		58.4	1.6879		58.4	3.3151		58.4	3.1759
	58.5	1.048		58.5	3.06855		58.5	1.7903		58.5	3.33955		58.5	3.1994
	58.6	1.0253		58.6	3.1122		58.6	1.7307		58.6	3.2654		58.6	3.212
	58.7	0.9877		58.7	2.97235		58.7	1.8032		58.7	3.24245		58.7	3.2869
	58.8	1.0208		58.8	3.2012		58.8	1.6381		58.8	3.5087		58.8	3.2249
	58.9	0.9832		58.9	3.05675		58.9	1.777		58.9	3.45815		58.9	3.1725
	59	1.0316		59	2.9532		59	1.8002		59	3.5494		59	3.1496
	59.1	0.9133		59.1	2.94855		59.1	1.7722		59.1	3.49335		59.1	3.1141
	59.2	0.9746		59.2	3.0423		59.2	1.9309		59.2	3.4782		59.2	3.0344
	59.3	1.0012		59.3	3.17385		59.3	1.9415		59.3	3.49205		59.3	2.9934
	59.4	1.0417		59.4	3.0835		59.4	1.895		59.4	3.5124		59.4	3.1397
	59.5	0.981		59.5	3.03855		59.5	1.9045		59.5	3.44605		59.5	3.1764
	59.6	0.9313		59.6	2.9605		59.6	1.8297		59.6	3.5701		59.6	3.2994
	59.7	0.8629		59.7	2.99235		59.7	1.9077		59.7	3.69165		59.7	3.293
	59.8	0.9008		59.8	3.1681		59.8	1.9797		59.8	3.5725		59.8	3.3119
	59.9	0.8758		59.9	3.07995		59.9	1.9014		59.9	3.53025		59.9	3.2851
	60	0.9185		60	3.1193		60	1.901		60	3.3139		60	3.3573
	60.1	0.9836		60.1	3.23685		60.1	1.8041		60.1	3.22215		60.1	3.4651
	60.2	1.0316		60.2	3.2317		60.2	1.8977		60.2	3.2788		60.2	3.6235
	60.3	0.9802		60.3	3.18995		60.3	1.8104		60.3	3.31915		60.3	3.5591
	60.4	0.9437		60.4	3.1829		60.4	1.7621		60.4	3.3523		60.4	3.5082
	60.5	1.0013		60.5	3.24155		60.5	1.6909		60.5	3.52385		60.5	3.5588
	60.6	1.0054		60.6	3.1991		60.6	1.6206		60.6	3.5333		60.6	3.4996
	60.7	0.9956		60.7	3.10905		60.7	1.5274		60.7	3.59625		60.7	3.6267
	60.8	0.9589		60.8	3.1445		60.8	1.7658		60.8	3.5441		60.8	3.6891
	60.9	0.9435		60.9	3.27655		60.9	1.7088		60.9	3.76185		60.9	3.7706
	61	1.0127		61	3.1574		61	1.7978		61	3.8159		61	3.5822
	61.1	1.0767		61.1	3.00875		61.1	1.8761		61.1	3.80285		61.1	3.6666
	61.2	1.1112		61.2	3.1473		61.2	1.7806		61.2	3.8281		61.2	3.5592
	61.3	1.0523		61.3	3.08895		61.3	1.7547		61.3	4.03765		61.3	3.7298
	61.4	1.0641		61.4	3.0182		61.4	1.7394		61.4	3.954		61.4	3.803
	61.5	1.1828		61.5	2.91615		61.5	1.6552		61.5	4.09635		61.5	3.6503
	61.6	1.1605		61.6	2.9999		61.6	1.5401		61.6	3.9438		61.6	3.6923
	61.7	1.1242		61.7	2.90665		61.7	1.5603		61.7	4.01065		61.7	3.8257
	61.8	1.1657		61.8	2.9003		61.8	1.7176		61.8	4.0104		61.8	3.9078
	61.9	1.091		61.9	2.94555		61.9	1.5055		61.9	4.19145		61.9	3.8744
	62	0.9595		62	3.0227		62	1.606		62	4.0207		62	3.9381
	62.1	1.0157		62.1	3.14095		62.1	1.6924		62.1	4.02825		62.1	3.7281
	62.2	1.1664		62.2	3.063		62.2	1.7012		62.2	3.9197		62.2	3.8548
	62.3	1.0795		62.3	3.25045		62.3	1.5312		62.3	3.93075		62.3	3.6304
	62.4	1.1561		62.4	3.1846		62.4	1.4636		62.4	3.8031		62.4	3.5982
	62.5	1.0928		62.5	3.28825		62.5	1.4835		62.5	3.80895		62.5	3.4723
	62.6	1.1023		62.6	3.3657		62.6	1.3866		62.6	3.9382		62.6	3.4866
	62.7	1.0114		62.7	3.38345		62.7	1.4245		62.7	3.93145		62.7	3.6476
	62.8	0.9385		62.8	3.4115		62.8	1.4839		62.8	3.9755		62.8	3.5196
	62.9	0.8912		62.9	3.43995		62.9	1.4418		62.9	3.91285		62.9	3.4785
	63	0.924		63	3.4449		63	1.6069		63	3.9397		63	3.4893
	63.1	0.9297		63.1	3.54705		63.1	1.3916		63.1	4.01125		63.1	3.4982
	63.2	0.882		63.2	3.5621		63.2	1.4677		63.2	4.0416		63.2	3.4605
	63.3	0.8473		63.3	3.65275		63.3	1.4818		63.3	4.18165		63.3	3.419
	63.4	0.8656		63.4	3.6338		63.4	1.5228		63.4	4.2175		63.4	3.5859
	63.5	0.9216		63.5	3.43465		63.5	1.5269		63.5	3.84935		63.5	3.5139
	63.6	0.8128		63.6	3.3133		63.6	1.6415		63.6	3.786		63.6	3.5479
	63.7	0.805		63.7	3.37115		63.7	1.4919		63.7	3.66795		63.7	3.615
	63.8	0.9845		63.8	3.4424		63.8	1.6808		63.8	3.868		63.8	3.5858
	63.9	0.9642		63.9	3.44755		63.9	1.6186		63.9	3.76695		63.9	3.5978
	64	0.8902		64	3.5264		64	1.5354		64	4.1624		64	3.4431
	64.1	0.8641		64.1	3.46305		64.1	1.6574		64.1	3.95055		64.1	3.5801
	64.2	0.9377		64.2	3.3868		64.2	1.6257		64.2	4.0287		64.2	3.5641
	64.3	0.9043		64.3	3.31525		64.3	1.5155		64.3	4.06625		64.3	3.5236
	64.4	0.8978		64.4	3.2298		64.4	1.6459		64.4	4.0358		64.4	3.5221
	64.5	0.851		64.5	3.22165		64.5	1.5564		64.5	4.14605		64.5	3.5468
	64.6	0.9358		64.6	3.3298		64.6	1.6737		64.6	4.1473		64.6	3.7022
	64.7	0.9794		64.7	3.33025		64.7	1.5077		64.7	4.30085		64.7	3.4958
	64.8	0.8857		64.8	3.2664		64.8	1.4572		64.8	4.2505		64.8	3.3818
	64.9	0.9232		64.9	3.28405		64.9	1.458		64.9	4.14585		64.9	3.5059
	65	0.8714		65	3.2588		65	1.3944		65	4.1544		65	3.5543
	65.1	0.9292		65.1	3.43615		65.1	1.4135		65.1	4.17925		65.1	3.3522
	65.2	0.8628		65.2	3.2766		65.2	1.5972		65.2	4.2477		65.2	3.3171
	65.3	0.8016		65.3	3.07595		65.3	1.5144		65.3	4.16515		65.3	3.2565
	65.4	0.8412		65.4	3.2194		65.4	1.5671		65.4	4.1523		65.4	3.4803
	65.5	0.9462		65.5	3.15925		65.5	1.5457		65.5	4.10675		65.5	3.3959
	65.6	0.9234		65.6	3.2821		65.6	1.5446		65.6	4.0926		65.6	3.3509
	65.7	0.85		65.7	3.34495		65.7	1.4908		65.7	4.09095		65.7	3.4298
	65.8	0.7759		65.8	3.4242		65.8	1.4555		65.8	4.1237		65.8	3.4385
	65.9	0.8841		65.9	3.50085		65.9	1.5293		65.9	4.12695		65.9	3.3353
	66	0.9695		66	3.4909		66	1.4252		66	4.0964		66	3.2113
	66.1	0.9374		66.1	3.37275		66.1	1.5101		66.1	4.12605		66.1	3.3653
	66.2	0.948		66.2	3.187		66.2	1.5334		66.2	4.1274		66.2	3.5284
	66.3	0.8809		66.3	3.37685		66.3	1.4866		66.3	4.15595		66.3	3.3454
	66.4	0.8315		66.4	3.4449		66.4	1.4697		66.4	3.9644		66.4	3.4163
	66.5	0.932		66.5	3.45525		66.5	1.526		66.5	4.11385		66.5	3.4617
	66.6	0.9489		66.6	3.2846		66.6	1.4438		66.6	4.1724		66.6	3.4538
	66.7	0.8759		66.7	3.45005		66.7	1.4168		66.7	4.16355		66.7	3.6217
	66.8	0.953		66.8	3.4421		66.8	1.4614		66.8	4.0699		66.8	3.6641
	66.9	1.0351		66.9	3.51865		66.9	1.3593		66.9	4.06635		66.9	3.6038
	67	1.0056		67	3.4802		67	1.3924		67	4.1095		67	3.561
	67.1	0.9945		67.1	3.70895		67.1	1.3334		67.1	4.19545		67.1	3.7713
	67.2	1.0097		67.2	3.6442		67.2	1.3837		67.2	4.158		67.2	3.6934
	67.3	0.8824		67.3	3.77875		67.3	1.3288		67.3	4.11335		67.3	3.7621
	67.4	0.9696		67.4	3.7509		67.4	1.3186		67.4	4.0307		67.4	3.9332
	67.5	1.1153		67.5	3.71555		67.5	1.2481		67.5	3.94255		67.5	3.8417
	67.6	1.0947		67.6	3.6866		67.6	1.3012		67.6	4.074		67.6	3.7054
	67.7	1.0481		67.7	3.40365		67.7	1.2913		67.7	4.13775		67.7	3.7675
	67.8	1.0314		67.8	3.4649		67.8	1.2485		67.8	4.0305		67.8	3.6907
	67.9	1.0297		67.9	3.37445		67.9	1.2775		67.9	4.10845		67.9	3.896
	68	0.9769		68	3.584		68	1.3485		68	4.2666		68	3.7721
	68.1	1.0527		68.1	3.51525		68.1	1.4614		68.1	4.32405		68.1	4.1078
	68.2	0.9384		68.2	3.4313		68.2	1.3383		68.2	4.2715		68.2	4.0196
	68.3	0.8342		68.3	3.23085		68.3	1.3698		68.3	4.34625		68.3	3.8022
	68.4	0.9169		68.4	3.2325		68.4	1.3063		68.4	4.149		68.4	3.6021
	68.5	1.0648		68.5	3.31355		68.5	1.5184		68.5	4.02775		68.5	3.5875
	68.6	1.1266		68.6	3.208		68.6	1.2462		68.6	3.9802		68.6	3.5428
	68.7	1.0506		68.7	3.19165		68.7	1.2799		68.7	4.00815		68.7	3.5553
	68.8	1.0275		68.8	3.2727		68.8	1.2501		68.8	3.8646		68.8	3.566
	68.9	0.8878		68.9	3.40005		68.9	1.2539		68.9	3.98875		68.9	3.6321
	69	0.9143		69	3.3668		69	1.3931		69	3.8065		69	3.5317
	69.1	0.9395		69.1	3.44665		69.1	1.3586		69.1	3.96815		69.1	3.7722
	69.2	0.9693		69.2	3.3741		69.2	1.3606		69.2	3.9096		69.2	3.7164
	69.3	0.8743		69.3	3.39155		69.3	1.4061		69.3	3.90685		69.3	3.723
	69.4	0.9749		69.4	3.3107		69.4	1.2855		69.4	3.8273		69.4	3.6137
	69.5	0.9529		69.5	3.30915		69.5	1.3417		69.5	3.68715		69.5	3.8297
	69.6	0.861		69.6	3.361		69.6	1.1638		69.6	3.7361		69.6	3.681
	69.7	0.8426		69.7	3.66745		69.7	1.2046		69.7	3.74905		69.7	3.5785
	69.8	0.8092		69.8	3.7054		69.8	1.196		69.8	3.625		69.8	3.6851
	69.9	0.7298		69.9	3.73195		69.9	1.0733		69.9	3.54195		69.9	3.5214
	70	0.902		70	3.7049		70	1.2198		70	3.5303		70	3.5464
	70.1	0.8764		70.1	3.66905		70.1	1.2063		70.1	3.61135		70.1	3.5379
	70.2	0.8846		70.2	3.7863		70.2	1.1563		70.2	3.3841		70.2	3.4559
	70.3	0.904		70.3	3.73295		70.3	1.173		70.3	3.28005		70.3	3.464
	70.4	0.8688		70.4	3.6709		70.4	1.1508		70.4	3.2567		70.4	3.5955
	70.5	0.9793		70.5	3.69055		70.5	1.0905		70.5	3.18355		70.5	3.4661
	70.6	0.9672		70.6	3.6057		70.6	1.1272		70.6	3.2861		70.6	3.4897
	70.7	0.8848		70.7	3.51115		70.7	1.0806		70.7	3.24945		70.7	3.664
	70.8	0.8657		70.8	3.4665		70.8	1.1678		70.8	3.2021		70.8	3.8309
	70.9	0.8689		70.9	3.56755		70.9	1.0858		70.9	3.22555		70.9	3.9083
	71	0.9598		71	3.5941		71	1.0799		71	3.2884		71	3.8861
	71.1	0.9488		71.1	3.56145		71.1	1.0675		71.1	3.26005		71.1	3.9753
	71.2	0.813		71.2	3.5481		71.2	1.047		71.2	3.1959		71.2	4.0319
	71.3	0.9086		71.3	3.69975		71.3	1.0724		71.3	3.10785		71.3	3.9861
	71.4	0.8353		71.4	3.7353		71.4	1.0548		71.4	3.216		71.4	3.9107
	71.5	0.855		71.5	3.81205		71.5	1.0528		71.5	3.25515		71.5	3.8808
	71.6	0.741		71.6	3.5974		71.6	1.078		71.6	3.4333		71.6	3.8596
	71.7	0.8033		71.7	3.61325		71.7	1.0991		71.7	3.34465		71.7	3.7224
	71.8	0.9132		71.8	3.7441		71.8	1.1693		71.8	3.3334		71.8	3.7922
	71.9	0.8489		71.9	3.64765		71.9	1.1851		71.9	3.33485		71.9	3.8065
	72	0.7406		72	3.8785		72	1.0956		72	3.2835		72	3.7176
	72.1	0.7915		72.1	3.79665		72.1	1.0533		72.1	3.34575		72.1	3.7271
	72.2	0.834		72.2	3.7696		72.2	1.0799		72.2	3.3356		72.2	3.7987
	72.3	0.9206		72.3	3.58125		72.3	1.0407		72.3	3.34865		72.3	3.7417
	72.4	0.8838		72.4	3.5858		72.4	1.0117		72.4	3.336		72.4	3.5499
	72.5	0.8313		72.5	3.44635		72.5	1.0704		72.5	3.14845		72.5	3.5082
	72.6	0.6838		72.6	3.4106		72.6	1.0164		72.6	3.1577		72.6	3.4664
	72.7	0.8349		72.7	3.29985		72.7	1.0899		72.7	3.11695		72.7	3.4001
	72.8	0.9244		72.8	3.3713		72.8	1.0369		72.8	3.1381		72.8	3.3085
	72.9	0.8189		72.9	3.24035		72.9	1.1082		72.9	3.17955		72.9	3.4194
	73	0.7587		73	3.3652		73	1.0355		73	3.2942		73	3.4745
	73.1	0.7711		73.1	3.42975		73.1	0.9968		73.1	3.19355		73.1	3.3184
	73.2	0.7957		73.2	3.1662		73.2	1.0883		73.2	3.155		73.2	3.3139
	73.3	0.8036		73.3	3.22875		73.3	1.0848		73.3	3.38985		73.3	3.218
	73.4	0.8345		73.4	3.3518		73.4	1.0884		73.4	3.3003		73.4	3.4176
	73.5	0.7705		73.5	3.23915		73.5	1.0045		73.5	3.08205		73.5	3.3892
	73.6	0.7974		73.6	3.1574		73.6	0.905		73.6	3.2025		73.6	3.2923
	73.7	0.7538		73.7	3.02905		73.7	0.8711		73.7	3.31855		73.7	3.1085
	73.8	0.7593		73.8	3.0065		73.8	0.7747		73.8	3.2975		73.8	3.2434
	73.9	0.9434		73.9	3.31985		73.9	0.8281		73.9	3.41225		73.9	3.0763
	74	0.9464		74	3.3837		74	0.8401		74	3.6184		74	3.0566
	74.1	0.8827		74.1	3.42225		74.1	0.8944		74.1	3.76525		74.1	3.134
	74.2	0.8492		74.2	3.4398		74.2	0.9114		74.2	3.7591		74.2	3.0958
	74.3	0.8877		74.3	3.47925		74.3	1.0101		74.3	3.63015		74.3	3.0797
	74.4	0.893		74.4	3.4294		74.4	0.9118		74.4	3.6539		74.4	3.0147
	74.5	0.9025		74.5	3.30345		74.5	0.9611		74.5	3.62225		74.5	3.1692
	74.6	0.8996		74.6	3.2423		74.6	0.94		74.6	3.6444		74.6	3.2587
	74.7	0.8065		74.7	3.07865		74.7	0.8876		74.7	3.53855		74.7	3.1624
	74.8	0.8616		74.8	2.9929		74.8	1.0094		74.8	3.5893		74.8	3.2226
	74.9	0.8157		74.9	2.99005		74.9	0.9852		74.9	3.42695		74.9	3.2322
	75	0.8453		75	3.0213		75	1.0021		75	3.5462		75	3.2253
	75.1	0.8513		75.1	2.86995		75.1	1.0633		75.1	3.66795		75.1	3.2299
	75.2	0.8076		75.2	2.8113		75.2	0.9712		75.2	3.4753		75.2	3.128
	75.3	0.7408		75.3	2.96225		75.3	1.0145		75.3	3.41645		75.3	3.0591
	75.4	0.8341		75.4	3.0686		75.4	0.9635		75.4	3.5743		75.4	3.1803
	75.5	0.8444		75.5	3.02415		75.5	0.9305		75.5	3.52985		75.5	3.1318
	75.6	0.8866		75.6	2.9807		75.6	0.847		75.6	3.6145		75.6	3.2117
	75.7	0.9402		75.7	2.95045		75.7	0.8084		75.7	3.73305		75.7	3.1139
	75.8	0.8275		75.8	2.9125		75.8	0.8581		75.8	3.8873		75.8	3.0159
	75.9	0.7985		75.9	3.02025		75.9	0.7689		75.9	3.98465		75.9	3.078
	76	0.755		76	3.0965		76	0.8372		76	4.0661		76	2.968
	76.1	0.7503		76.1	3.04195		76.1	0.7945		76.1	4.14125		76.1	3.1013
	76.2	0.8219		76.2	2.9773		76.2	0.8065		76.2	4.0367		76.2	3.0518
	76.3	0.7547		76.3	2.96225		76.3	0.7389		76.3	4.08145		76.3	2.9748
	76.4	0.683		76.4	2.9338		76.4	0.7988		76.4	3.9598		76.4	2.9902
	76.5	0.744		76.5	2.91015		76.5	0.7157		76.5	3.78575		76.5	3.0845
	76.6	0.7234		76.6	2.9405		76.6	0.8102		76.6	3.822		76.6	3.0637
	76.7	0.7458		76.7	2.81985		76.7	0.8373		76.7	3.72265		76.7	3.0641
	76.8	0.7587		76.8	2.8069		76.8	0.8526		76.8	3.8348		76.8	3.0786
	76.9	0.8117		76.9	2.88405		76.9	0.8394		76.9	3.76645		76.9	3.1096
	77	0.8699		77	2.9391		77	0.8638		77	3.7857		77	3.0523
	77.1	0.8171		77.1	3.04885		77.1	0.8594		77.1	3.81845		77.1	3.1263
	77.2	0.932		77.2	2.9973		77.2	0.9188		77.2	3.72		77.2	3.0279
	77.3	0.8996		77.3	2.98605		77.3	0.7952		77.3	3.84405		77.3	2.9203
	77.4	0.792		77.4	3.1549		77.4	0.8442		77.4	3.8828		77.4	3.027
	77.5	0.8724		77.5	3.06365		77.5	0.7548		77.5	3.77815		77.5	3.0554
	77.6	0.9199		77.6	3.104		77.6	0.7341		77.6	3.8512		77.6	3.0004
	77.7	1.0307		77.7	3.25125		77.7	0.8233		77.7	3.81945		77.7	3.0173
	77.8	1.0355		77.8	3.196		77.8	0.8826		77.8	3.8548		77.8	3.0625
	77.9	1.1543		77.9	3.24815		77.9	0.9		77.9	3.92095		77.9	3.0705
	78	0.985		78	3.3143		78	0.8174		78	3.8079		78	3.1253
	78.1	1.0831		78.1	3.17335		78.1	0.8668		78.1	3.83135		78.1	3.1659
	78.2	1.0374		78.2	3.243		78.2	0.7783		78.2	3.8559		78.2	3.1295
	78.3	0.9332		78.3	3.25165		78.3	0.92		78.3	4.02175		78.3	3.1174
	78.4	0.849		78.4	3.3355		78.4	0.8349		78.4	3.9181		78.4	3.2006
	78.5	0.9059		78.5	3.25585		78.5	0.8446		78.5	3.93235		78.5	3.1741
	78.6	0.8647		78.6	3.2356		78.6	0.8835		78.6	3.7104		78.6	3.1059
	78.7	0.8887		78.7	3.29465		78.7	0.8973		78.7	3.72775		78.7	3.0067
	78.8	0.7798		78.8	3.3167		78.8	0.8584		78.8	3.5576		78.8	3.1262
	78.9	0.8214		78.9	3.23295		78.9	0.921		78.9	3.60455		78.9	3.1215
	79	0.8252		79	3.33		79	0.9342		79	3.6035		79	3.1419
	79.1	0.8269		79.1	3.24035		79.1	0.8928		79.1	3.47955		79.1	3.1687
	79.2	0.9423		79.2	3.2367		79.2	0.9982		79.2	3.5467		79.2	3.2005
	79.3	0.9049		79.3	3.22675		79.3	1.0228		79.3	3.50295		79.3	3.1497
	79.4	0.9438		79.4	3.3674		79.4	0.8653		79.4	3.6266		79.4	2.996
	79.5	0.9019		79.5	3.31365		79.5	0.9463		79.5	3.62235		79.5	3.0663
	79.6	0.8074		79.6	3.378		79.6	0.8582		79.6	3.6347		79.6	3.0543
	79.7	0.8938		79.7	3.33785		79.7	0.8429		79.7	3.53105		79.7	3.1207
	79.8	0.9726		79.8	3.2432		79.8	0.7353		79.8	3.6115		79.8	3.1975
	79.9	0.8494		79.9	3.13915		79.9	0.7397		79.9	3.57685		79.9	3.1336
	80	0.8446		80	2.9819		80	0.7963		80	3.4908		80	3.1542
	80.1	0.8603		80.1	3.20325		80.1	0.8307		80.1	3.53785		80.1	3.179
	80.2	0.9182		80.2	3.0576		80.2	0.8921		80.2	3.515		80.2	3.0647
	80.3	0.9691		80.3	3.20285		80.3	0.955		80.3	3.58485		80.3	3.2283
	80.4	0.9429		80.4	3.1229		80.4	0.8999		80.4	3.4418		80.4	3.289
	80.5	0.9682		80.5	3.23885		80.5	0.7747		80.5	3.37105		80.5	3.3551
	80.6	0.8922		80.6	3.1545		80.6	0.8264		80.6	3.5327		80.6	3.2155
	80.7	0.8568		80.7	3.27185		80.7	0.8899		80.7	3.59435		80.7	3.2722
	80.8	0.958		80.8	3.2859		80.8	0.8394		80.8	3.6344		80.8	3.1563
	80.9	0.9347		80.9	3.45095		80.9	0.8382		80.9	3.69225		80.9	3.0779
	81	1.0156		81	3.3598		81	0.8845		81	3.811		81	3.129
	81.1	1.0329		81.1	3.41705		81.1	0.8875		81.1	3.88155		81.1	3.0115
	81.2	1.0502		81.2	3.3462		81.2	0.8891		81.2	3.8033		81.2	3.0292
	81.3	0.9924		81.3	3.41075		81.3	0.8498		81.3	3.81905		81.3	2.9463
	81.4	0.8772		81.4	3.448		81.4	0.8614		81.4	3.7752		81.4	2.858
	81.5	0.8843		81.5	3.30025		81.5	0.9033		81.5	3.71285		81.5	2.8926
	81.6	0.9196		81.6	3.5535		81.6	0.9095		81.6	3.661		81.6	2.8435
	81.7	0.7912		81.7	3.38955		81.7	0.92		81.7	3.74255		81.7	2.9792
	81.8	0.7977		81.8	3.108		81.8	0.8196		81.8	3.5036		81.8	3.0203
	81.9	0.8083		81.9	3.11185		81.9	0.8734		81.9	3.47985		81.9	2.9598
	82	0.8424		82	3.1357		82	0.8665		82	3.487		82	3.0214
	82.1	0.8255		82.1	3.16525		82.1	0.8028		82.1	3.56115		82.1	2.9309
	82.2	0.7523		82.2	3.0603		82.2	0.7114		82.2	3.7063		82.2	2.9178
	82.3	0.7346		82.3	3.16845		82.3	0.8475		82.3	3.65605		82.3	2.8412
	82.4	0.8201		82.4	3.1642		82.4	0.9346		82.4	3.6752		82.4	2.9203
	82.5	0.8831		82.5	3.32655		82.5	0.8828		82.5	3.52745		82.5	2.8682
	82.6	0.8324		82.6	3.2931		82.6	0.8698		82.6	3.5065		82.6	2.8525
	82.7	0.9227		82.7	3.23715		82.7	0.8137		82.7	3.52005		82.7	2.8693
	82.8	0.9064		82.8	3.2468		82.8	0.8419		82.8	3.6465		82.8	2.8767
	82.9	0.9584		82.9	3.28685		82.9	0.8655		82.9	3.66915		82.9	2.794
	83	0.8811		83	3.2418		83	0.8362		83	3.6971		83	2.9227
	83.1	0.8714		83.1	3.08855		83.1	0.8066		83.1	3.65535		83.1	2.9486
	83.2	0.817		83.2	3.101		83.2	0.7956		83.2	3.4278		83.2	3.1034
	83.3	0.874		83.3	3.11485		83.3	0.8838		83.3	3.42155		83.3	3.0309
	83.4	0.8861		83.4	3.1688		83.4	0.882		83.4	3.4916		83.4	3.1098
	83.5	0.921		83.5	3.16945		83.5	0.8569		83.5	3.40575		83.5	2.9805
	83.6	0.9358		83.6	3.2377		83.6	0.765		83.6	3.322		83.6	3.0983
	83.7	0.9546		83.7	3.30795		83.7	0.8098		83.7	3.39335		83.7	3.0464
	83.8	0.9354		83.8	3.2156		83.8	0.9057		83.8	3.4262		83.8	3.0663
	83.9	0.8259		83.9	3.11645		83.9	0.9304		83.9	3.37105		83.9	3.0454
	84	0.8171		84	3.1254		84	0.9697		84	3.3067		84	2.9825
	84.1	0.8065		84.1	3.19775		84.1	0.9094		84.1	3.30645		84.1	2.9543
	84.2	0.83		84.2	2.9742		84.2	0.9032		84.2	3.5764		84.2	2.8405
	84.3	0.7858		84.3	3.01365		84.3	0.7839		84.3	3.56005		84.3	2.8668
	84.4	0.7249		84.4	3.0768		84.4	0.871		84.4	3.443		84.4	2.8661
	84.5	0.8421		84.5	3.00755		84.5	0.9796		84.5	3.31565		84.5	2.8685
	84.6	0.7876		84.6	3.1195		84.6	0.9997		84.6	3.2798		84.6	2.8984
	84.7	0.7716		84.7	3.05855		84.7	0.8732		84.7	3.31295		84.7	2.9059
	84.8	0.7844		84.8	3.0558		84.8	0.749		84.8	3.3428		84.8	2.9066
	84.9	0.8456		84.9	3.00975		84.9	0.9258		84.9	3.41415		84.9	2.9613
	85	0.8405		85	3.048		85	0.9213		85	3.3687		85	2.8721
	85.1	0.808		85.1	3.08575		85.1	0.8655		85.1	3.47655		85.1	2.838
	85.2	0.8546		85.2	3.1235		85.2	0.8309		85.2	3.4898		85.2	2.9539
	85.3	0.798		85.3	3.15425		85.3	0.8275		85.3	3.50105		85.3	2.9139
	85.4	0.7985		85.4	3.1681		85.4	0.8886		85.4	3.622		85.4	2.7936
	85.5	0.8448		85.5	2.99885		85.5	0.9115		85.5	3.46645		85.5	2.9206
	85.6	0.7708		85.6	3.0986		85.6	0.9409		85.6	3.4264		85.6	2.9302
	85.7	0.7296		85.7	3.01325		85.7	0.9254		85.7	3.20915		85.7	2.9104
	85.8	0.856		85.8	3.2475		85.8	0.8453		85.8	3.3718		85.8	2.9491
	85.9	0.7993		85.9	3.31725		85.9	0.7034		85.9	3.32385		85.9	2.9563
	86	0.7866		86	3.2398		86	0.7661		86	3.4937		86	2.8911
	86.1	0.8535		86.1	3.05875		86.1	0.8755		86.1	3.49695		86.1	2.9549
	86.2	0.8729		86.2	3.2221		86.2	0.8542		86.2	3.2636		86.2	3.1409
	86.3	0.6491		86.3	3.22645		86.3	0.7665		86.3	3.18655		86.3	3.0786
	86.4	0.759		86.4	3.1498		86.4	0.7803		86.4	3.2486		86.4	3.0699
	86.5	0.8144		86.5	3.26585		86.5	0.8783		86.5	3.49165		86.5	3.0814
	86.6	0.7686		86.6	3.3559		86.6	0.913		86.6	3.5201		86.6	3.2065
	86.7	0.722		86.7	3.33225		86.7	0.8932		86.7	3.54335		86.7	3.0799
	86.8	0.7793		86.8	3.3628		86.8	0.9017		86.8	3.4959		86.8	3.0674
	86.9	0.8405		86.9	3.35345		86.9	0.8859		86.9	3.50745		86.9	2.9723
	87	0.7837		87	3.2726		87	0.8909		87	3.473		87	3.0187
	87.1	0.8725		87.1	3.38295		87.1	0.9621		87.1	3.44795		87.1	2.9132
	87.2	0.9164		87.2	3.2652		87.2	0.8865		87.2	3.5521		87.2	3.0122
	87.3	0.8138		87.3	3.28265		87.3	0.9303		87.3	3.60135		87.3	2.868
	87.4	0.8562		87.4	3.2679		87.4	0.9869		87.4	3.5688		87.4	3.066
	87.5	0.8523		87.5	3.31005		87.5	0.9802		87.5	3.56415		87.5	3.0291
	87.6	0.8585		87.6	3.6399		87.6	0.9074		87.6	3.4449		87.6	3.0488
	87.7	0.8265		87.7	3.57585		87.7	0.9124		87.7	3.37995		87.7	3.0084
	87.8	0.7996		87.8	3.68		87.8	0.8739		87.8	3.3966		87.8	3.0853
	87.9	0.8356		87.9	3.70005		87.9	0.7354		87.9	3.29005		87.9	3.1855
	88	0.8642		88	3.5353		88	0.8488		88	3.3224		88	3.3771
	88.1	0.7891		88.1	3.47855		88.1	0.8975		88.1	3.31645		88.1	3.1337
	88.2	0.8313		88.2	3.4714		88.2	0.8412		88.2	3.2858		88.2	2.9967
	88.3	0.7865		88.3	3.49335		88.3	0.8704		88.3	3.22685		88.3	2.9891
	88.4	0.7691		88.4	3.5735		88.4	0.9247		88.4	3.2486		88.4	3.0369
	88.5	0.7932		88.5	3.46535		88.5	0.806		88.5	3.22715		88.5	3.0413
	88.6	0.8194		88.6	3.1919		88.6	0.9489		88.6	3.0572		88.6	3.029
	88.7	0.7705		88.7	3.18455		88.7	0.9381		88.7	3.11935		88.7	3.0663
	88.8	0.8039		88.8	3.2339		88.8	0.9174		88.8	3.0808		88.8	2.9341
	88.9	0.891		88.9	3.34905		88.9	0.8649		88.9	3.22925		88.9	2.8375
	89	0.8306		89	3.4652		89	0.9593		89	3.1338		89	2.8333
	89.1	0.9202		89.1	3.69875		89.1	0.9145		89.1	3.25615		89.1	2.7947
	89.2	0.8113		89.2	3.835		89.2	0.8767		89.2	3.1827		89.2	2.7488
	89.3	0.816		89.3	3.78595		89.3	0.7569		89.3	3.33245		89.3	2.6378
	89.4	0.855		89.4	3.7497		89.4	0.9634		89.4	3.3963		89.4	2.607
	89.5	0.8797		89.5	3.73275		89.5	0.9108		89.5	3.35985		89.5	2.6039
	89.6	0.8291		89.6	3.6423		89.6	0.869		89.6	3.289		89.6	2.5464
	89.7	0.9208		89.7	3.55965		89.7	0.8348		89.7	3.15705		89.7	2.6969
	89.8	0.9368		89.8	3.7172		89.8	0.8029		89.8	3.178		89.8	2.6155
	89.9	0.9093		89.9	3.79505		89.9	0.8043		89.9	3.07955		89.9	2.6457
	90	0.8441		90	3.8274		90	0.8893		90	3.1055		90	2.5729
	90.1	0.8355		90.1	3.85365		90.1	0.9537		90.1	3.12275		90.1	2.5906
	90.2	0.9443		90.2	3.7636		90.2	0.8815		90.2	3.2307		90.2	2.6476
	90.3	0.8683		90.3	3.76955		90.3	0.9209		90.3	3.18295		90.3	2.5975
	90.4	0.7918		90.4	3.6428		90.4	0.8805		90.4	3.0829		90.4	2.6413
	90.5	0.7861		90.5	3.66955		90.5	0.9344		90.5	3.05425		90.5	2.553
	90.6	0.9664		90.6	3.7451		90.6	0.8215		90.6	2.9338		90.6	2.5234
	90.7	0.9147		90.7	3.78595		90.7	0.838		90.7	2.90565		90.7	2.5441
	90.8	0.8431		90.8	3.7191		90.8	0.7574		90.8	2.9397		90.8	2.4923
	90.9	0.8195		90.9	3.62775		90.9	0.7052		90.9	2.99135		90.9	2.4461
	91	0.8313		91	3.802		91	0.7593		91	2.9032		91	2.3494
	91.1	0.9022		91.1	3.80625		91.1	0.7151		91.1	2.96955		91.1	2.3378
	91.2	0.8662		91.2	3.618		91.2	0.7457		91.2	3.0408		91.2	2.2936
	91.3	0.8514		91.3	3.54235		91.3	0.8129		91.3	2.93565		91.3	2.2878
	91.4	0.8444		91.4	3.7368		91.4	0.8504		91.4	2.8971		91.4	2.2842
	91.5	0.6826		91.5	3.80755		91.5	0.8614		91.5	3.06115		91.5	2.3485
	91.6	0.7332		91.6	3.5516		91.6	0.8143		91.6	2.9649		91.6	2.2809
	91.7	0.6539		91.7	3.58435		91.7	0.8433		91.7	2.86835		91.7	2.2052
	91.8	0.7367		91.8	3.6836		91.8	0.7541		91.8	2.8385		91.8	2.2933
	91.9	0.6864		91.9	3.46665		91.9	0.8744		91.9	2.97825		91.9	2.2614
	92	0.6333		92	3.3833		92	0.8222		92	2.954		92	2.1597
	92.1	0.6624		92.1	3.29995		92.1	0.7272		92.1	2.95345		92.1	2.1314
	92.2	0.7578		92.2	3.3837		92.2	0.7384		92.2	2.9511		92.2	2.0638
	92.3	0.7898		92.3	3.43085		92.3	0.6742		92.3	2.87945		92.3	2.1564
	92.4	0.7308		92.4	3.4227		92.4	0.6948		92.4	2.7034		92.4	2.1102
	92.5	0.7125		92.5	3.47325		92.5	0.7785		92.5	2.79825		92.5	2.0856
	92.6	0.7372		92.6	3.349		92.6	0.6867		92.6	2.6856		92.6	1.9786
	92.7	0.7452		92.7	3.41285		92.7	0.6923		92.7	2.73035		92.7	1.9245
	92.8	0.6786		92.8	3.2899		92.8	0.8363		92.8	2.6974		92.8	1.977
	92.9	0.6792		92.9	3.36435		92.9	0.859		92.9	2.65475		92.9	2.021
	93	0.6657		93	3.2655		93	0.7629		93	2.6071		93	2.0322
	93.1	0.6618		93.1	3.49135		93.1	0.7564		93.1	2.58945		93.1	1.9242
	93.2	0.68		93.2	3.5617		93.2	0.6433		93.2	2.4692		93.2	1.8845
	93.3	0.7311		93.3	3.50075		93.3	0.7341		93.3	2.47525		93.3	1.9821
	93.4	0.731		93.4	3.4377		93.4	0.7188		93.4	2.6229		93.4	1.8499
	93.5	0.6799		93.5	3.34745		93.5	0.7321		93.5	2.50185		93.5	1.9581
	93.6	0.7997		93.6	3.3008		93.6	0.8967		93.6	2.4431		93.6	1.9776
	93.7	0.7008		93.7	3.24015		93.7	0.8778		93.7	2.64065		93.7	1.9497
	93.8	0.7081		93.8	3.3887		93.8	0.8425		93.8	2.5372		93.8	2.0336
	93.9	0.7388		93.9	3.20685		93.9	0.8977		93.9	2.50065		93.9	2.004
	94	0.7361		94	3.3195		94	0.8104		94	2.4166		94	2.0359
	94.1	0.804		94.1	3.33645		94.1	0.7569		94.1	2.29265		94.1	1.9421
	94.2	0.6558		94.2	3.2338		94.2	0.8176		94.2	2.4766		94.2	1.8794
	94.3	0.7042		94.3	3.30285		94.3	0.8944		94.3	2.47435		94.3	1.865
	94.4	0.7096		94.4	3.2787		94.4	0.9632		94.4	2.4267		94.4	1.8617
	94.5	0.805		94.5	3.19165		94.5	0.9182		94.5	2.39265		94.5	1.8536
	94.6	0.7947		94.6	3.1131		94.6	0.8951		94.6	2.4714		94.6	1.8609
	94.7	0.8248		94.7	3.07415		94.7	0.952		94.7	2.31535		94.7	1.804
	94.8	0.8497		94.8	3.1147		94.8	1.0323		94.8	2.3394		94.8	1.7934
	94.9	0.9052		94.9	3.30455		94.9	0.997		94.9	2.28765		94.9	1.7388
	95	0.7876		95	3.3081		95	0.9271		95	2.3659		95	1.7354
	95.1	0.865		95.1	3.30005		95.1	0.8535		95.1	2.25535		95.1	1.6716
	95.2	0.8617		95.2	3.2131		95.2	0.8901		95.2	2.1447		95.2	1.8253
	95.3	0.8409		95.3	3.31235		95.3	0.9655		95.3	2.11945		95.3	1.8449
	95.4	0.8536		95.4	3.3558		95.4	0.8613		95.4	2.1965		95.4	1.7573
	95.5	0.8927		95.5	3.30335		95.5	0.956		95.5	2.20115		95.5	1.7833
	95.6	0.8813		95.6	3.1317		95.6	0.8124		95.6	2.0883		95.6	1.6306
	95.7	0.877		95.7	3.21455		95.7	0.8137		95.7	2.10225		95.7	1.6516
	95.8	0.9461		95.8	3.2751		95.8	0.9573		95.8	2.2349		95.8	1.6685
	95.9	0.96		95.9	3.15375		95.9	0.99		95.9	2.26155		95.9	1.6753
	96	1.0851		96	3.1818		96	0.9609		96	2.2816		96	1.6538
	96.1	0.9517		96.1	3.20805		96.1	0.9779		96.1	2.28885		96.1	1.6395
	96.2	0.8611		96.2	3.1678		96.2	0.9604		96.2	2.2721		96.2	1.6752
	96.3	0.8987		96.3	3.05875		96.3	0.9124		96.3	2.29345		96.3	1.6977
	96.4	0.8785		96.4	3.0416		96.4	0.9366		96.4	2.2795		96.4	1.6586
	96.5	0.7996		96.5	3.07825		96.5	0.8954		96.5	2.33145		96.5	1.657
	96.6	0.8735		96.6	3.2476		96.6	0.9606		96.6	2.377		96.6	1.8268
	96.7	0.8062		96.7	3.06845		96.7	0.9589		96.7	2.35425		96.7	1.7514
	96.8	0.8868		96.8	3.1074		96.8	0.9063		96.8	2.4436		96.8	1.7091
	96.9	0.8625		96.9	3.21625		96.9	0.9342		96.9	2.37395		96.9	1.7127
	97	0.8213		97	3.1702		97	0.9815		97	2.3884		97	1.5949
	97.1	0.7331		97.1	3.22385		97.1	0.9723		97.1	2.30105		97.1	1.6682
	97.2	0.831		97.2	3.1054		97.2	0.8396		97.2	2.254		97.2	1.585
	97.3	0.8865		97.3	3.11125		97.3	0.8592		97.3	2.32155		97.3	1.4132
	97.4	0.753		97.4	3.0796		97.4	0.966		97.4	2.182		97.4	1.4551
	97.5	0.7737		97.5	3.18615		97.5	0.9595		97.5	2.26795		97.5	1.5115
	97.6	0.7819		97.6	3.1954		97.6	0.7986		97.6	2.3058		97.6	1.4224
	97.7	0.9578		97.7	3.33665		97.7	0.891		97.7	2.23005		97.7	1.502
	97.8	0.902		97.8	3.3683		97.8	0.888		97.8	2.2273		97.8	1.469
	97.9	0.9816		97.9	3.56715		97.9	0.7766		97.9	2.13865		97.9	1.4604
	98	1.0172		98	3.6782		98	0.7509		98	2.256		98	1.5688
	98.1	0.9971		98.1	3.56825		98.1	0.782		98.1	2.23605		98.1	1.5133
	98.2	0.956		98.2	3.4039		98.2	0.7492		98.2	2.2555		98.2	1.5488
	98.3	0.965		98.3	3.34225		98.3	0.8793		98.3	2.17385		98.3	1.436
	98.4	0.8467		98.4	3.4829		98.4	0.8105		98.4	2.0658		98.4	1.5927
	98.5	0.8941		98.5	3.52255		98.5	0.7586		98.5	2.09315		98.5	1.5327
	98.6	0.87		98.6	3.4729		98.6	0.8364		98.6	2.1302		98.6	1.5767
	98.7	0.8621		98.7	3.42565		98.7	0.8001		98.7	2.12345		98.7	1.6835
	98.8	0.8259		98.8	3.2558		98.8	0.8352		98.8	2.1401		98.8	1.685
	98.9	0.7185		98.9	3.33945		98.9	0.8215		98.9	2.11985		98.9	1.7331
	99	0.8347		99	3.4644		99	0.8953		99	2.1133		99	1.7856
	99.1	0.8077		99.1	3.37595		99.1	0.8233		99.1	2.17585		99.1	1.6996
	99.2	0.7755		99.2	3.3471		99.2	0.8327		99.2	2.1506		99.2	1.6907
	99.3	0.7627		99.3	3.36475		99.3	0.865		99.3	2.16425		99.3	1.7636
	99.4	0.7399		99.4	3.3641		99.4	0.9173		99.4	2.0817		99.4	1.634
	99.5	0.7265		99.5	3.27695		99.5	0.8989		99.5	2.17425		99.5	1.5576
	99.6	0.7864		99.6	3.2079		99.6	0.83		99.6	2.1584		99.6	1.6855
	99.7	0.7001		99.7	3.18075		99.7	0.7841		99.7	2.20075		99.7	1.5596
	99.8	0.6954		99.8	3.2931		99.8	0.8936		99.8	2.1037		99.8	1.6127
	99.9	0.7591		99.9	3.18755		99.9	0.9131		99.9	2.12675		99.9	1.6171
	100	0.8803		100	3.0884		100	0.9141		100	1.9343		100	1.7233

## Sheet: Figure 5D
Fig. 5D
Time evolution of the z-coordinate of the center of mass (Zcm) of the transmembrane helices of STX17TM in the case of membranes without PI4P or PI
	#1			#2			#3			#4			#5
	time (nsec)	z_cm (nm)		time (nsec)	z_cm (nm)		time (nsec)	z_cm (nm)		time (nsec)	z_cm (nm)		time (nsec)	z_cm (nm)
	0.1	5.186		0.1	5.2091		0.1	5.1628		0.1	5.2319		0.1	5.3363
	0.2	5.2985		0.2	5.152		0.2	5.1232		0.2	5.0584		0.2	5.3092
	0.3	5.4484		0.3	5.0396		0.3	5.1923		0.3	4.8142		0.3	5.2722
	0.4	5.6343		0.4	5.3938		0.4	5.3201		0.4	4.97		0.4	5.2013
	0.5	5.5934		0.5	5.3943		0.5	5.2993		0.5	4.9779		0.5	5.2189
	0.6	5.3804		0.6	5.446		0.6	5.3538		0.6	5.2551		0.6	5.1289
	0.7	5.424		0.7	5.2699		0.7	5.1172		0.7	5.1722		0.7	5.13
	0.8	5.5337		0.8	5.3383		0.8	5.235		0.8	5.1841		0.8	5.0852
	0.9	5.5133		0.9	5.334		0.9	5.1496		0.9	5.1109		0.9	5.1316
	1	5.2868		1	5.2035		1	5.277		1	5.0112		1	5.0887
	1.1	5.3354		1.1	5.3352		1.1	5.1171		1.1	5.1002		1.1	5.2459
	1.2	5.3476		1.2	5.3527		1.2	5.2103		1.2	5.1646		1.2	4.9696
	1.3	5.3863		1.3	5.4328		1.3	5.2907		1.3	5.347		1.3	4.8043
	1.4	5.4372		1.4	5.4397		1.4	5.1921		1.4	5.1286		1.4	4.7117
	1.5	5.4024		1.5	5.4701		1.5	5.2286		1.5	5.0728		1.5	4.7449
	1.6	5.2352		1.6	5.3625		1.6	5.4153		1.6	5.1389		1.6	4.8494
	1.7	5.1544		1.7	5.4012		1.7	5.2827		1.7	5.0129		1.7	4.7912
	1.8	5.2127		1.8	5.4414		1.8	5.249		1.8	5.2252		1.8	4.8034
	1.9	5.3569		1.9	5.2272		1.9	5.2313		1.9	5.3368		1.9	5.033
	2	5.2518		2	5.159		2	5.2594		2	5.3381		2	4.8718
	2.1	5.2569		2.1	5.2037		2.1	5.1836		2.1	5.3919		2.1	4.7872
	2.2	5.2459		2.2	5.1018		2.2	5.0745		2.2	5.3602		2.2	4.7813
	2.3	5.2036		2.3	5.1312		2.3	5.038		2.3	5.3251		2.3	4.8171
	2.4	5.2167		2.4	4.9724		2.4	5.1129		2.4	5.2459		2.4	4.9599
	2.5	5.0208		2.5	4.7667		2.5	4.9566		2.5	5.0489		2.5	4.8361
	2.6	4.9446		2.6	4.8295		2.6	5.051		2.6	5.2445		2.6	4.8515
	2.7	4.8668		2.7	4.8498		2.7	4.8874		2.7	5.2167		2.7	4.8821
	2.8	4.8341		2.8	4.6958		2.8	4.7975		2.8	5.4433		2.8	4.7309
	2.9	4.8916		2.9	4.7152		2.9	4.7834		2.9	5.2387		2.9	4.6895
	3	4.6799		3	4.8086		3	4.627		3	5.4488		3	4.571
	3.1	4.7562		3.1	4.8914		3.1	4.5025		3.1	5.519		3.1	4.5449
	3.2	4.8242		3.2	4.9941		3.2	4.4375		3.2	5.4278		3.2	4.3864
	3.3	4.7645		3.3	5.0844		3.3	4.3758		3.3	5.6018		3.3	4.3788
	3.4	4.9256		3.4	5.1434		3.4	4.5659		3.4	5.5804		3.4	4.3786
	3.5	4.8555		3.5	5.1064		3.5	4.32		3.5	5.5542		3.5	4.4441
	3.6	4.6999		3.6	5.1616		3.6	4.3271		3.6	5.5675		3.6	4.2405
	3.7	4.763		3.7	5.0907		3.7	4.4383		3.7	5.6052		3.7	4.3183
	3.8	4.7078		3.8	5.3057		3.8	4.9436		3.8	5.4622		3.8	4.4072
	3.9	4.8005		3.9	5.0665		3.9	4.8295		3.9	5.3639		3.9	4.3845
	4	4.8779		4	5.0372		4	4.963		4	5.4594		4	4.2731
	4.1	4.817		4.1	4.8166		4.1	4.8948		4.1	5.416		4.1	4.4305
	4.2	4.899		4.2	4.8119		4.2	5.1576		4.2	5.4136		4.2	4.5109
	4.3	4.8284		4.3	4.7938		4.3	4.8895		4.3	5.3809		4.3	4.7284
	4.4	4.8925		4.4	4.9291		4.4	4.7419		4.4	5.605		4.4	4.6672
	4.5	4.6782		4.5	4.8905		4.5	4.7616		4.5	5.4927		4.5	4.6057
	4.6	4.6371		4.6	4.9924		4.6	4.687		4.6	5.4713		4.6	4.8061
	4.7	4.9144		4.7	4.9725		4.7	4.7881		4.7	5.3711		4.7	4.84
	4.8	4.8646		4.8	4.9849		4.8	4.7552		4.8	5.527		4.8	4.7296
	4.9	4.6858		4.9	5.0446		4.9	4.8541		4.9	5.5152		4.9	4.7098
	5	4.6277		5	5.1687		5	4.8588		5	5.4232		5	4.6315
	5.1	4.7624		5.1	4.9502		5.1	5.1584		5.1	5.6875		5.1	4.7631
	5.2	4.8386		5.2	5.0898		5.2	5.1256		5.2	5.7475		5.2	4.8053
	5.3	4.8112		5.3	4.8622		5.3	5.2048		5.3	5.6221		5.3	4.9946
	5.4	4.5846		5.4	4.9422		5.4	5.1095		5.4	5.5631		5.4	5.0198
	5.5	4.3996		5.5	4.9496		5.5	5.0286		5.5	5.417		5.5	5.0122
	5.6	4.5605		5.6	4.9762		5.6	4.8046		5.6	5.5644		5.6	5.1382
	5.7	4.2305		5.7	4.8067		5.7	4.5379		5.7	5.6163		5.7	5.3072
	5.8	4.4299		5.8	4.6413		5.8	4.5827		5.8	5.5177		5.8	5.3905
	5.9	4.4655		5.9	4.4557		5.9	4.8031		5.9	5.5877		5.9	5.5868
	6	4.2443		6	4.5713		6	4.9783		6	5.5981		6	5.7464
	6.1	4.1425		6.1	4.5988		6.1	5.0969		6.1	5.267		6.1	5.6062
	6.2	4.3075		6.2	4.6671		6.2	5.2886		6.2	5.272		6.2	5.6729
	6.3	4.2409		6.3	4.8678		6.3	5.3415		6.3	5.1726		6.3	5.6374
	6.4	4.0847		6.4	4.7069		6.4	5.3083		6.4	5.1039		6.4	5.6621
	6.5	4.3552		6.5	4.8502		6.5	5.2537		6.5	5.1834		6.5	5.6628
	6.6	4.3793		6.6	4.8035		6.6	5.3973		6.6	5.1806		6.6	5.9057
	6.7	4.3842		6.7	4.6612		6.7	5.1535		6.7	5.2498		6.7	5.8157
	6.8	4.1744		6.8	4.7151		6.8	4.8326		6.8	4.939		6.8	5.7023
	6.9	4.0357		6.9	4.7031		6.9	4.9099		6.9	4.7829		6.9	5.5556
	7	4.0793		7	4.9501		7	5.0957		7	4.8091		7	5.4408
	7.1	4.0637		7.1	4.8709		7.1	4.9841		7.1	4.7627		7.1	5.354
	7.2	3.9819		7.2	5.0747		7.2	5.0201		7.2	4.6169		7.2	5.6592
	7.3	3.8577		7.3	5.3332		7.3	5.0196		7.3	4.5375		7.3	5.5991
	7.4	3.8417		7.4	5.356		7.4	4.9075		7.4	4.4243		7.4	5.5915
	7.5	3.9597		7.5	5.3973		7.5	4.8943		7.5	4.3173		7.5	5.6701
	7.6	3.9939		7.6	5.2603		7.6	4.74		7.6	4.4008		7.6	5.8192
	7.7	3.7727		7.7	5.4293		7.7	4.7154		7.7	4.4476		7.7	6.0589
	7.8	3.9797		7.8	5.4596		7.8	4.6485		7.8	4.3396		7.8	5.8291
	7.9	3.8963		7.9	5.5002		7.9	4.6108		7.9	4.4171		7.9	5.8849
	8	3.858		8	5.4598		8	4.5925		8	4.4662		8	5.7445
	8.1	3.8727		8.1	5.5651		8.1	4.674		8.1	4.4722		8.1	5.8011
	8.2	3.8014		8.2	5.2783		8.2	4.8228		8.2	4.5405		8.2	5.4317
	8.3	3.7506		8.3	5.6639		8.3	5.0282		8.3	4.5705		8.3	5.5371
	8.4	3.7084		8.4	5.9955		8.4	5.1388		8.4	4.5218		8.4	5.2871
	8.5	3.8136		8.5	6.1902		8.5	5.2197		8.5	4.8286		8.5	5.2047
	8.6	3.7283		8.6	6.1084		8.6	5.1662		8.6	4.8203		8.6	5.2581
	8.7	3.8436		8.7	6.1949		8.7	5.1588		8.7	4.9078		8.7	5.2545
	8.8	3.8037		8.8	6.1783		8.8	5.0968		8.8	4.8625		8.8	5.3796
	8.9	3.909		8.9	6.0231		8.9	5.0206		8.9	4.9449		8.9	5.4859
	9	3.7443		9	6.1295		9	4.9888		9	4.8772		9	5.5684
	9.1	3.8981		9.1	6.0291		9.1	4.757		9.1	5.0366		9.1	5.6905
	9.2	3.8445		9.2	5.751		9.2	4.6913		9.2	4.8463		9.2	5.7066
	9.3	3.8818		9.3	5.8566		9.3	4.5933		9.3	4.8762		9.3	5.7166
	9.4	3.6461		9.4	5.9797		9.4	4.7607		9.4	4.879		9.4	5.7181
	9.5	3.93		9.5	6.0537		9.5	4.549		9.5	4.7855		9.5	5.506
	9.6	4.0945		9.6	5.993		9.6	4.4743		9.6	4.6313		9.6	5.4761
	9.7	3.9989		9.7	5.7426		9.7	4.4022		9.7	4.3958		9.7	5.4722
	9.8	3.9284		9.8	5.9334		9.8	4.2747		9.8	4.5757		9.8	5.3557
	9.9	3.8267		9.9	5.9303		9.9	4.2889		9.9	4.4873		9.9	5.5861
	10	3.7515		10	6.0172		10	4.3515		10	4.593		10	5.3503
	10.1	3.7631		10.1	5.9993		10.1	4.3313		10.1	4.6256		10.1	5.2025
	10.2	3.9384		10.2	6.0064		10.2	4.4256		10.2	4.4297		10.2	5.1087
	10.3	3.82		10.3	6.0285		10.3	4.2509		10.3	4.5283		10.3	5.1896
	10.4	3.7526		10.4	6.1333		10.4	4.3207		10.4	4.4978		10.4	5.0887
	10.5	3.6767		10.5	6.0578		10.5	4.0599		10.5	4.4543		10.5	5.1467
	10.6	3.666		10.6	6.0904		10.6	4.2068		10.6	4.4125		10.6	5.1769
	10.7	3.5989		10.7	5.9806		10.7	4.0778		10.7	4.2032		10.7	5.3303
	10.8	3.5864		10.8	6.1188		10.8	4.4017		10.8	4.3223		10.8	5.3308
	10.9	3.8361		10.9	6.1931		10.9	4.3871		10.9	4.3635		10.9	5.3192
	11	3.9194		11	6.2303		11	4.4733		11	4.542		11	5.4872
	11.1	3.8829		11.1	5.9936		11.1	4.4984		11.1	4.5396		11.1	5.3608
	11.2	3.8931		11.2	5.9376		11.2	4.6086		11.2	4.3533		11.2	5.559
	11.3	4.0274		11.3	6.0722		11.3	4.5442		11.3	4.2303		11.3	5.6328
	11.4	3.9642		11.4	5.9357		11.4	4.622		11.4	4.3782		11.4	5.4046
	11.5	3.907		11.5	6.0008		11.5	4.5894		11.5	4.5025		11.5	5.5351
	11.6	3.8683		11.6	6.0758		11.6	4.5136		11.6	4.7589		11.6	5.5657
	11.7	3.7996		11.7	6.1771		11.7	4.4977		11.7	4.8482		11.7	5.6242
	11.8	3.722		11.8	6.31		11.8	4.7421		11.8	4.8493		11.8	5.708
	11.9	3.5968		11.9	6.3997		11.9	5.0723		11.9	4.6204		11.9	5.8796
	12	3.5836		12	6.5368		12	5.0383		12	4.7917		12	5.7735
	12.1	3.617		12.1	6.5742		12.1	4.8808		12.1	4.7613		12.1	5.9445
	12.2	3.5335		12.2	6.6096		12.2	4.8362		12.2	4.8258		12.2	5.8133
	12.3	3.5746		12.3	6.3488		12.3	4.7106		12.3	5.025		12.3	5.8011
	12.4	3.4317		12.4	6.3897		12.4	4.6989		12.4	5.0393		12.4	5.8736
	12.5	3.3986		12.5	6.3894		12.5	4.4837		12.5	5.0251		12.5	5.8252
	12.6	3.5296		12.6	6.6594		12.6	4.617		12.6	4.961		12.6	5.5772
	12.7	3.5117		12.7	6.6694		12.7	4.5759		12.7	4.9688		12.7	5.4377
	12.8	3.6559		12.8	6.5858		12.8	4.7305		12.8	4.8961		12.8	5.4182
	12.9	3.5963		12.9	6.7511		12.9	4.7809		12.9	4.9275		12.9	5.2224
	13	3.5409		13	6.8657		13	4.5162		13	5.0604		13	5.3732
	13.1	3.5177		13.1	6.7839		13.1	4.5136		13.1	5.1678		13.1	5.257
	13.2	3.3993		13.2	6.946		13.2	4.4795		13.2	5.2109		13.2	5.6251
	13.3	3.3084		13.3	6.8366		13.3	4.5286		13.3	5.2972		13.3	5.5374
	13.4	3.291		13.4	6.7616		13.4	4.2988		13.4	5.3959		13.4	5.6065
	13.5	3.5055		13.5	6.6482		13.5	4.1846		13.5	5.2627		13.5	5.4923
	13.6	3.5557		13.6	6.62		13.6	4.2537		13.6	5.1971		13.6	5.7093
	13.7	3.5443		13.7	6.8307		13.7	4.406		13.7	5.4154		13.7	5.6988
	13.8	3.5138		13.8	6.6958		13.8	4.4188		13.8	5.5796		13.8	5.6747
	13.9	3.4512		13.9	6.6677		13.9	4.5463		13.9	5.4173		13.9	5.6633
	14	3.5252		14	6.7838		14	4.7513		14	5.2961		14	5.7579
	14.1	3.3762		14.1	6.8689		14.1	4.7668		14.1	5.2976		14.1	5.7961
	14.2	3.3336		14.2	6.7995		14.2	4.715		14.2	5.3867		14.2	5.9165
	14.3	3.3076		14.3	6.6397		14.3	4.7949		14.3	5.4114		14.3	5.8983
	14.4	3.2449		14.4	6.6137		14.4	4.8405		14.4	5.364		14.4	5.9494
	14.5	3.1899		14.5	6.8525		14.5	4.9121		14.5	5.3875		14.5	5.9988
	14.6	3.1643		14.6	7.0075		14.6	5.095		14.6	5.1375		14.6	5.9082
	14.7	3.2304		14.7	6.9364		14.7	4.8807		14.7	5.2452		14.7	5.9026
	14.8	3.156		14.8	6.8804		14.8	4.7681		14.8	5.2203		14.8	5.7174
	14.9	3.1152		14.9	6.6981		14.9	4.7473		14.9	5.2321		14.9	5.6445
	15	3.0476		15	6.8922		15	4.7424		15	5.2713		15	5.7081
	15.1	3.0439		15.1	6.9984		15.1	4.6864		15.1	5.3993		15.1	5.5675
	15.2	2.905		15.2	7.1342		15.2	4.4428		15.2	5.2925		15.2	5.5685
	15.3	2.9908		15.3	6.8975		15.3	4.3796		15.3	5.3879		15.3	5.4409
	15.4	3.2241		15.4	6.9396		15.4	4.4203		15.4	5.3808		15.4	5.4447
	15.5	3.3378		15.5	6.8618		15.5	4.6481		15.5	5.277		15.5	5.5655
	15.6	3.4275		15.6	6.6091		15.6	4.3731		15.6	5.1305		15.6	5.4359
	15.7	3.4165		15.7	6.8547		15.7	4.5877		15.7	5.0446		15.7	5.4355
	15.8	3.5877		15.8	6.4282		15.8	4.2842		15.8	5.008		15.8	5.5616
	15.9	3.4571		15.9	6.5931		15.9	4.4994		15.9	4.7343		15.9	5.5807
	16	3.2901		16	6.6159		16	4.4378		16	4.732		16	5.5309
	16.1	3.4113		16.1	6.7724		16.1	4.5345		16.1	4.8601		16.1	5.4873
	16.2	3.4038		16.2	6.6603		16.2	4.4599		16.2	4.918		16.2	5.4986
	16.3	3.4496		16.3	6.8105		16.3	4.422		16.3	4.8635		16.3	5.501
	16.4	3.2933		16.4	7.0459		16.4	4.3015		16.4	4.8007		16.4	5.3118
	16.5	3.2389		16.5	7.0389		16.5	4.4023		16.5	4.9731		16.5	5.1913
	16.6	3.2726		16.6	7.1229		16.6	4.4055		16.6	5.0139		16.6	5.1413
	16.7	3.3541		16.7	7.1586		16.7	4.3936		16.7	5.1891		16.7	5.0805
	16.8	3.3639		16.8	7.0304		16.8	4.4844		16.8	5.1695		16.8	5.0508
	16.9	3.3151		16.9	6.7845		16.9	4.4501		16.9	5.0415		16.9	4.941
	17	3.4511		17	6.773		17	4.7177		17	5.0374		17	4.7859
	17.1	3.5633		17.1	6.5506		17.1	4.9736		17.1	4.9707		17.1	4.6631
	17.2	3.5184		17.2	6.6539		17.2	5.1459		17.2	4.936		17.2	4.6925
	17.3	3.5795		17.3	6.5758		17.3	4.8676		17.3	5.0373		17.3	4.6119
	17.4	3.5901		17.4	6.8154		17.4	4.5879		17.4	4.9535		17.4	4.7453
	17.5	3.5686		17.5	6.8701		17.5	4.7853		17.5	4.747		17.5	4.7881
	17.6	3.6358		17.6	7.2242		17.6	4.8022		17.6	4.8516		17.6	4.9618
	17.7	3.5605		17.7	7.2649		17.7	4.7868		17.7	4.8853		17.7	4.9744
	17.8	3.7232		17.8	7.0792		17.8	4.6835		17.8	4.7541		17.8	5.0554
	17.9	3.6221		17.9	7.2932		17.9	4.6511		17.9	4.8194		17.9	5.0908
	18	3.7157		18	7.3983		18	4.819		18	4.7908		18	5.0104
	18.1	3.6144		18.1	7.3111		18.1	4.6958		18.1	4.6797		18.1	4.7454
	18.2	3.6371		18.2	7.3876		18.2	4.6622		18.2	4.4155		18.2	5.0331
	18.3	3.4744		18.3	7.356		18.3	4.4263		18.3	4.3956		18.3	4.9169
	18.4	3.5353		18.4	7.1547		18.4	4.6109		18.4	4.3811		18.4	4.953
	18.5	3.451		18.5	7.3906		18.5	4.4714		18.5	4.3837		18.5	5.1687
	18.6	3.5853		18.6	7.4853		18.6	4.6233		18.6	4.3639		18.6	4.7986
	18.7	3.8226		18.7	7.2775		18.7	4.5801		18.7	4.4994		18.7	5.0425
	18.8	3.649		18.8	7.3556		18.8	4.4319		18.8	4.6744		18.8	5.0344
	18.9	3.5964		18.9	7.5159		18.9	4.4983		18.9	4.3923		18.9	4.9932
	19	3.6674		19	7.3543		19	4.5249		19	4.3906		19	4.9591
	19.1	3.5375		19.1	7.471		19.1	4.5192		19.1	4.3468		19.1	4.9458
	19.2	3.5241		19.2	7.4413		19.2	4.621		19.2	4.3309		19.2	4.8233
	19.3	3.4639		19.3	7.3253		19.3	4.5665		19.3	4.2955		19.3	4.7516
	19.4	3.3388		19.4	7.3198		19.4	4.832		19.4	4.354		19.4	4.6887
	19.5	3.5469		19.5	7.4215		19.5	4.8965		19.5	4.2419		19.5	4.7573
	19.6	3.6126		19.6	7.5667		19.6	4.9753		19.6	4.2055		19.6	4.7346
	19.7	3.6246		19.7	7.6282		19.7	5.0316		19.7	4.2381		19.7	4.8154
	19.8	3.6175		19.8	7.5062		19.8	5.1443		19.8	4.1802		19.8	4.9747
	19.9	3.7412		19.9	7.6042		19.9	5.2325		19.9	4.2746		19.9	5.1239
	20	4.0337		20	7.3673		20	5.2857		20	4.38		20	5.1268
	20.1	4.1585		20.1	7.3055		20.1	5.2774		20.1	4.3655		20.1	5.1924
	20.2	4.2192		20.2	7.0569		20.2	5.2556		20.2	4.5665		20.2	4.9951
	20.3	4.3462		20.3	7.2101		20.3	5.2273		20.3	4.4693		20.3	4.8809
	20.4	4.4993		20.4	7.1304		20.4	5.3557		20.4	4.2952		20.4	4.8386
	20.5	4.5116		20.5	7.3333		20.5	5.5645		20.5	4.2773		20.5	4.6824
	20.6	4.5002		20.6	7.4277		20.6	5.5311		20.6	4.2468		20.6	4.7122
	20.7	4.6802		20.7	7.4996		20.7	5.515		20.7	4.5143		20.7	4.7288
	20.8	4.624		20.8	7.3134		20.8	5.5874		20.8	4.3499		20.8	4.8705
	20.9	4.7141		20.9	7.4262		20.9	5.585		20.9	4.4563		20.9	4.6827
	21	4.7248		21	7.4818		21	5.4133		21	4.5861		21	4.7409
	21.1	4.699		21.1	7.236		21.1	5.4329		21.1	4.6933		21.1	4.7871
	21.2	4.6666		21.2	7.0873		21.2	5.522		21.2	4.6251		21.2	4.6604
	21.3	4.7891		21.3	7.0159		21.3	5.4707		21.3	4.6671		21.3	4.5417
	21.4	4.9133		21.4	6.8742		21.4	5.4523		21.4	4.5875		21.4	4.8009
	21.5	4.8397		21.5	6.8218		21.5	5.4069		21.5	4.4799		21.5	4.9633
	21.6	4.942		21.6	6.8551		21.6	5.5156		21.6	4.6804		21.6	4.8617
	21.7	4.7775		21.7	6.8524		21.7	5.5204		21.7	4.634		21.7	4.7822
	21.8	4.7592		21.8	6.4964		21.8	5.3494		21.8	4.645		21.8	4.8394
	21.9	4.4161		21.9	6.6533		21.9	5.2732		21.9	4.514		21.9	4.7328
	22	4.4592		22	6.8254		22	5.2835		22	4.5856		22	4.8798
	22.1	4.4848		22.1	6.8337		22.1	5.354		22.1	4.3918		22.1	4.9378
	22.2	4.4892		22.2	7.0766		22.2	5.7041		22.2	4.3094		22.2	4.9828
	22.3	4.6229		22.3	7.0428		22.3	5.5153		22.3	4.3981		22.3	4.8165
	22.4	4.6649		22.4	7.0159		22.4	5.432		22.4	4.372		22.4	4.9339
	22.5	4.557		22.5	7.3079		22.5	5.1491		22.5	4.3069		22.5	5.0923
	22.6	4.5573		22.6	7.2784		22.6	5.0365		22.6	4.3221		22.6	5.443
	22.7	4.6522		22.7	7.3218		22.7	4.9266		22.7	4.446		22.7	5.4616
	22.8	4.4698		22.8	7.2836		22.8	5.1348		22.8	4.1255		22.8	5.5771
	22.9	4.7296		22.9	7.4412		22.9	5.3337		22.9	4.1255		22.9	5.5622
	23	4.6483		23	7.4386		23	5.1471		23	4.1693		23	5.4211
	23.1	4.5237		23.1	7.5234		23.1	5.2767		23.1	4.2137		23.1	5.2934
	23.2	4.2684		23.2	7.5032		23.2	5.3474		23.2	4.2813		23.2	5.0329
	23.3	4.2804		23.3	7.3366		23.3	5.1479		23.3	4.0099		23.3	5.0635
	23.4	4.2398		23.4	7.3487		23.4	5.2768		23.4	4.1075		23.4	5.0051
	23.5	4.1024		23.5	7.1725		23.5	5.0501		23.5	4.1823		23.5	4.6432
	23.6	4.1376		23.6	7.5257		23.6	4.6845		23.6	4.1438		23.6	4.6686
	23.7	4.6212		23.7	7.6648		23.7	4.5738		23.7	4.1679		23.7	4.6162
	23.8	4.5604		23.8	7.3681		23.8	4.7723		23.8	4.2549		23.8	4.6729
	23.9	4.4203		23.9	7.228		23.9	5.0234		23.9	4.0562		23.9	4.6701
	24	4.5072		24	7.1505		24	5.1456		24	3.9678		24	4.6406
	24.1	4.6205		24.1	7.1723		24.1	5.0841		24.1	3.9472		24.1	4.4695
	24.2	4.4362		24.2	7.0507		24.2	5.1071		24.2	3.9859		24.2	4.4337
	24.3	4.5521		24.3	6.8424		24.3	5.1483		24.3	4.035		24.3	4.6614
	24.4	4.3696		24.4	6.9534		24.4	5.2795		24.4	4.1488		24.4	4.5914
	24.5	4.0932		24.5	6.9333		24.5	5.553		24.5	4.2554		24.5	4.4131
	24.6	4.0126		24.6	7.0936		24.6	5.6026		24.6	4.34		24.6	4.4249
	24.7	4.036		24.7	7.357		24.7	5.6086		24.7	4.5191		24.7	4.5028
	24.8	4.0171		24.8	7.4691		24.8	5.5482		24.8	4.3748		24.8	4.8324
	24.9	4.0862		24.9	7.7137		24.9	5.4929		24.9	4.3694		24.9	4.736
	25	4.0988		25	7.6374		25	5.5776		25	4.2185		25	4.6522
	25.1	4.1126		25.1	7.6357		25.1	5.8258		25.1	4.1238		25.1	4.5613
	25.2	4.1118		25.2	7.5781		25.2	5.9645		25.2	4.0145		25.2	4.5261
	25.3	4.2103		25.3	7.7832		25.3	5.9947		25.3	4.0731		25.3	4.6221
	25.4	4.2382		25.4	7.7428		25.4	5.8552		25.4	3.9782		25.4	4.5047
	25.5	4.2718		25.5	7.9182		25.5	5.8249		25.5	4.1458		25.5	4.5998
	25.6	4.254		25.6	8.0227		25.6	5.6154		25.6	4.0126		25.6	4.3818
	25.7	4.2945		25.7	7.8583		25.7	5.4342		25.7	3.98		25.7	4.5219
	25.8	4.4454		25.8	8.0404		25.8	5.2364		25.8	4.2395		25.8	4.4743
	25.9	4.4546		25.9	8.0367		25.9	5.1779		25.9	4.2295		25.9	4.2739
	26	4.4689		26	7.788		26	5.1257		26	4.2418		26	4.2459
	26.1	4.4042		26.1	8.0343		26.1	5.3277		26.1	4.3445		26.1	4.3573
	26.2	4.5184		26.2	7.8837		26.2	5.2964		26.2	4.34		26.2	4.5137
	26.3	4.337		26.3	8.041		26.3	5.1301		26.3	4.2183		26.3	4.4881
	26.4	4.4409		26.4	7.8185		26.4	5.0423		26.4	4.1794		26.4	4.6921
	26.5	4.5089		26.5	7.6052		26.5	5.0116		26.5	4.3298		26.5	4.4322
	26.6	4.5347		26.6	7.8207		26.6	5.3254		26.6	4.4813		26.6	4.4599
	26.7	4.6794		26.7	7.7784		26.7	5.6779		26.7	4.6304		26.7	4.5809
	26.8	4.5722		26.8	7.6959		26.8	5.6578		26.8	4.3538		26.8	4.6721
	26.9	4.7508		26.9	7.739		26.9	5.5466		26.9	4.2844		26.9	4.6188
	27	4.962		27	7.7563		27	5.4489		27	4.1314		27	4.7046
	27.1	4.9704		27.1	7.3542		27.1	5.6667		27.1	4.1911		27.1	4.7154
	27.2	5.2841		27.2	7.2302		27.2	5.7191		27.2	4.1651		27.2	4.8956
	27.3	5.1973		27.3	7.0734		27.3	5.6142		27.3	4.1858		27.3	4.8095
	27.4	5.1198		27.4	7.0626		27.4	5.4415		27.4	4.2051		27.4	4.8792
	27.5	4.6878		27.5	7.0766		27.5	5.5027		27.5	4.2177		27.5	4.8722
	27.6	4.6123		27.6	7.0326		27.6	5.4852		27.6	4.2268		27.6	4.6231
	27.7	4.7264		27.7	6.9761		27.7	5.3361		27.7	4.3774		27.7	4.5892
	27.8	4.8067		27.8	6.7911		27.8	5.4783		27.8	4.0566		27.8	4.3392
	27.9	4.6524		27.9	6.6951		27.9	5.5484		27.9	4.074		27.9	4.5452
	28	4.4062		28	7.0668		28	5.3981		28	4.0076		28	4.6122
	28.1	4.3009		28.1	7.1253		28.1	5.567		28.1	3.8611		28.1	4.4814
	28.2	4.3904		28.2	7.1127		28.2	5.4856		28.2	3.7953		28.2	4.5782
	28.3	4.438		28.3	7.3895		28.3	5.3891		28.3	3.721		28.3	4.6856
	28.4	4.5038		28.4	7.3073		28.4	5.5096		28.4	3.7086		28.4	4.7004
	28.5	4.5983		28.5	7.3156		28.5	5.4105		28.5	3.7499		28.5	4.7218
	28.6	4.4911		28.6	7.373		28.6	5.398		28.6	3.7985		28.6	4.8287
	28.7	4.4612		28.7	7.3939		28.7	5.3552		28.7	3.8375		28.7	4.7227
	28.8	4.4387		28.8	7.4019		28.8	5.3864		28.8	4.1117		28.8	4.7592
	28.9	4.3747		28.9	7.3567		28.9	5.3468		28.9	4.0248		28.9	5.1987
	29	4.2849		29	7.1402		29	5.3336		29	3.9607		29	5.1213
	29.1	4.2509		29.1	7.177		29.1	5.2971		29.1	4.0972		29.1	5.2115
	29.2	4.3963		29.2	7.246		29.2	5.392		29.2	4.3221		29.2	5.0906
	29.3	4.2809		29.3	7.0997		29.3	5.6393		29.3	4.3904		29.3	4.7323
	29.4	4.4525		29.4	6.9759		29.4	5.5133		29.4	4.1263		29.4	5.1706
	29.5	4.4913		29.5	6.9709		29.5	5.5526		29.5	4.2002		29.5	5.364
	29.6	4.3016		29.6	7.1004		29.6	5.5342		29.6	4.2368		29.6	5.4685
	29.7	4.3238		29.7	7.265		29.7	5.6072		29.7	4.2393		29.7	5.3608
	29.8	4.2484		29.8	7.4717		29.8	5.6796		29.8	4.2818		29.8	5.2719
	29.9	4.2098		29.9	7.7587		29.9	5.5872		29.9	4.3207		29.9	5.3471
	30	4.2418		30	8.138		30	5.6997		30	4.3962		30	5.4269
	30.1	4.1789		30.1	8.1706		30.1	5.8533		30.1	4.33		30.1	5.4741
	30.2	4.2883		30.2	8.316		30.2	5.8931		30.2	4.4302		30.2	5.4251
	30.3	4.3763		30.3	8.3763		30.3	5.934		30.3	4.5415		30.3	5.3143
	30.4	4.3921		30.4	8.5404		30.4	5.9807		30.4	4.3967		30.4	5.5846
	30.5	4.462		30.5	8.7302		30.5	5.7895		30.5	4.3948		30.5	5.5467
	30.6	4.5546		30.6	8.7977		30.6	5.7436		30.6	4.3506		30.6	5.5888
	30.7	4.5807		30.7	8.9489		30.7	5.5529		30.7	4.5114		30.7	5.8175
	30.8	4.5213		30.8	8.6695		30.8	5.4852		30.8	4.6124		30.8	5.7702
	30.9	4.6961		30.9	8.4826		30.9	5.5273		30.9	4.6929		30.9	5.8198
	31	4.7005		31	8.5109		31	5.2217		31	4.5097		31	5.7541
	31.1	4.5324		31.1	8.3373		31.1	5.1746		31.1	4.4683		31.1	5.7365
	31.2	4.5657		31.2	8.2624		31.2	5.1704		31.2	4.6327		31.2	5.8462
	31.3	4.7785		31.3	8.236		31.3	5.4491		31.3	4.4853		31.3	5.967
	31.4	4.7667		31.4	8.3794		31.4	5.4838		31.4	4.2887		31.4	6.0512
	31.5	4.6006		31.5	8.2226		31.5	5.4815		31.5	4.3529		31.5	5.8757
	31.6	4.7262		31.6	8.0752		31.6	5.4352		31.6	4.3693		31.6	5.697
	31.7	4.7901		31.7	8.4359		31.7	5.1705		31.7	4.4585		31.7	5.7329
	31.8	4.7186		31.8	8.7179		31.8	5.2371		31.8	4.7464		31.8	5.7873
	31.9	4.5323		31.9	8.6061		31.9	5.3675		31.9	4.825		31.9	5.7568
	32	4.65		32	8.5552		32	5.2642		32	4.8212		32	5.666
	32.1	4.7096		32.1	8.5742		32.1	5.5159		32.1	5.0021		32.1	5.757
	32.2	5.0611		32.2	8.6571		32.2	5.4098		32.2	5.0896		32.2	5.5101
	32.3	5.0189		32.3	8.5116		32.3	5.4035		32.3	5.1349		32.3	5.515
	32.4	4.9462		32.4	8.7332		32.4	5.3788		32.4	5.3244		32.4	5.451
	32.5	4.7684		32.5	8.6279		32.5	5.2802		32.5	5.1578		32.5	5.462
	32.6	4.7009		32.6	8.5844		32.6	5.4083		32.6	5.0976		32.6	5.4406
	32.7	4.5792		32.7	8.6355		32.7	5.2608		32.7	5.1512		32.7	5.611
	32.8	4.5505		32.8	8.6268		32.8	5.0868		32.8	5.0519		32.8	5.6346
	32.9	4.6274		32.9	8.8005		32.9	5.1185		32.9	5.2224		32.9	5.8791
	33	4.6487		33	8.8749		33	4.96		33	5.2695		33	5.8077
	33.1	4.699		33.1	8.7559		33.1	5.2721		33.1	5.5033		33.1	5.896
	33.2	4.5581		33.2	8.9733		33.2	5.2549		33.2	5.4068		33.2	6.1396
	33.3	4.5213		33.3	9.0423		33.3	5.2353		33.3	5.5201		33.3	6.0529
	33.4	4.5053		33.4	8.9805		33.4	5.198		33.4	5.6558		33.4	5.8862
	33.5	4.2886		33.5	9.0798		33.5	5.2959		33.5	5.3478		33.5	5.9291
	33.6	4.4934		33.6	8.9019		33.6	5.0935		33.6	5.073		33.6	6.143
	33.7	4.4266		33.7	8.9369		33.7	5.1861		33.7	5.0568		33.7	6.0795
	33.8	4.4483		33.8	8.9625		33.8	5.0913		33.8	4.8355		33.8	6.2513
	33.9	4.3392		33.9	9.0844		33.9	5.2266		33.9	4.7245		33.9	6.1306
	34	4.3877		34	9.0063		34	5.3585		34	4.5257		34	6.1179
	34.1	4.3411		34.1	9.1549		34.1	5.1077		34.1	4.5949		34.1	5.9681
	34.2	4.3228		34.2	9.2996		34.2	4.9389		34.2	4.799		34.2	6.0273
	34.3	4.4022		34.3	9.0443		34.3	5.0251		34.3	4.7047		34.3	5.7514
	34.4	4.4343		34.4	9.0982		34.4	4.9315		34.4	4.8977		34.4	5.6405
	34.5	4.2822		34.5	9.1484		34.5	5.0711		34.5	5.1168		34.5	5.6316
	34.6	4.3758		34.6	9.0203		34.6	4.9932		34.6	5.1169		34.6	5.7092
	34.7	4.4074		34.7	9.1217		34.7	5.3694		34.7	5.0607		34.7	5.7702
	34.8	4.1935		34.8	9.0197		34.8	5.2831		34.8	5.0338		34.8	5.8449
	34.9	4.2522		34.9	9.2341		34.9	5.15		34.9	4.8765		34.9	5.9545
	35	4.2682		35	9.2895		35	5.3786		35	4.7608		35	5.8545
	35.1	4.3091		35.1	9.3938		35.1	5.2189		35.1	4.9544		35.1	5.8742
	35.2	4.3646		35.2	9.5079		35.2	5.3275		35.2	4.9712		35.2	5.8087
	35.3	4.5214		35.3	9.7362		35.3	5.2716		35.3	4.5442		35.3	5.7512
	35.4	4.3788		35.4	9.6914		35.4	5.2598		35.4	4.8013		35.4	5.809
	35.5	4.466		35.5	9.6657		35.5	5.1787		35.5	4.772		35.5	5.9096
	35.6	4.3243		35.6	9.8435		35.6	5.1138		35.6	4.8076		35.6	5.6967
	35.7	4.4868		35.7	9.9622		35.7	5.3095		35.7	4.8238		35.7	5.7271
	35.8	4.3815		35.8	9.8768		35.8	5.3602		35.8	4.6193		35.8	5.9574
	35.9	4.6237		35.9	9.7016		35.9	5.6219		35.9	4.6426		35.9	5.7701
	36	4.6235		36	9.524		36	5.6005		36	4.5814		36	5.7777
	36.1	4.3973		36.1	9.5882		36.1	5.7303		36.1	4.5047		36.1	6.1194
	36.2	4.4559		36.2	9.7916		36.2	5.9475		36.2	4.4499		36.2	6.0363
	36.3	4.5189		36.3	9.786		36.3	5.8107		36.3	4.4022		36.3	6.179
	36.4	4.4995		36.4	9.8926		36.4	6.0337		36.4	4.0556		36.4	6.3588
	36.5	4.4647		36.5	9.9246		36.5	6.0297		36.5	4.09		36.5	6.348
	36.6	4.6486		36.6	10.0408		36.6	6.0325		36.6	4.0721		36.6	6.4829
	36.7	4.6962		36.7	9.9534		36.7	6.0159		36.7	4.0275		36.7	6.442
	36.8	4.9258		36.8	10.0614		36.8	5.8678		36.8	4.0211		36.8	6.3196
	36.9	4.8266		36.9	10.4673		36.9	5.8288		36.9	4.0438		36.9	6.4657
	37	4.8417		37	10.6249		37	5.7343		37	4.0888		37	6.6191
	37.1	5.0243		37.1	10.5223		37.1	5.8958		37.1	4.1419		37.1	6.7411
	37.2	5.1975		37.2	10.4754		37.2	5.9537		37.2	4.2838		37.2	6.8472
	37.3	4.9397		37.3	10.6225		37.3	5.9818		37.3	4.0613		37.3	6.8057
	37.4	5.0887		37.4	10.4549		37.4	6.2329		37.4	4.1268		37.4	6.9951
	37.5	5.2612		37.5	10.4416		37.5	6.2035		37.5	4.0133		37.5	7.0243
	37.6	5.5611		37.6	10.7185		37.6	6.304		37.6	3.897		37.6	6.9546
	37.7	5.2597		37.7	10.9111		37.7	6.3382		37.7	4.1866		37.7	7.0954
	37.8	5.4173		37.8	10.8509		37.8	6.2114		37.8	4.2914		37.8	6.9768
	37.9	5.3529		37.9	10.7317		37.9	6.0966		37.9	4.1554		37.9	6.9658
	38	5.2666		38	10.6067		38	6.0088		38	4.3004		38	7.2974
	38.1	5.0542		38.1	10.5237		38.1	6.1173		38.1	4.1093		38.1	7.2962
	38.2	5.0791		38.2	10.2566		38.2	6.2756		38.2	4.0946		38.2	7.6547
	38.3	4.9998		38.3	10.2763		38.3	6.3246		38.3	4.2095		38.3	7.8024
	38.4	5.1469		38.4	10.2665		38.4	6.3199		38.4	4.1858		38.4	7.7278
	38.5	5.1813		38.5	10.2694		38.5	6.4466		38.5	4.2938		38.5	7.8409
	38.6	5.2855		38.6	10.3784		38.6	6.1649		38.6	4.136		38.6	7.8105
	38.7	5.2128		38.7	10.2886		38.7	6.4413		38.7	4.0187		38.7	7.6897
	38.8	5.1278		38.8	10.2074		38.8	6.3852		38.8	3.9708		38.8	7.6129
	38.9	5.1977		38.9	10.2415		38.9	6.2634		38.9	3.9551		38.9	7.6659
	39	5.2935		39	10.1424		39	6.1789		39	3.8756		39	8.1499
	39.1	5.0967		39.1	9.8847		39.1	6.3849		39.1	3.9267		39.1	8.3695
	39.2	5.0603		39.2	9.886		39.2	6.2567		39.2	3.795		39.2	8.6628
	39.3	4.9821		39.3	9.6551		39.3	6.196		39.3	3.7557		39.3	8.9406
	39.4	5.0443		39.4	9.6715		39.4	6.4096		39.4	3.7574		39.4	8.5039
	39.5	5.0598		39.5	9.612		39.5	6.398		39.5	3.7267		39.5	8.5455
	39.6	5.2495		39.6	9.4367		39.6	6.4075		39.6	4.0104		39.6	8.5244
	39.7	5.2238		39.7	9.2249		39.7	6.4157		39.7	3.8427		39.7	8.4367
	39.8	5.3464		39.8	8.9467		39.8	6.5905		39.8	3.988		39.8	8.4385
	39.9	5.4454		39.9	8.9845		39.9	6.5877		39.9	4.1239		39.9	8.2992
	40	5.3548		40	9.11		40	6.6097		40	4.1439		40	8.4861
	40.1	5.1377		40.1	9.2994		40.1	6.6973		40.1	4.1288		40.1	8.5163
	40.2	4.9464		40.2	9.332		40.2	6.9516		40.2	4.187		40.2	8.2944
	40.3	4.8092		40.3	9.023		40.3	6.9321		40.3	4.2505		40.3	8.456
	40.4	4.9944		40.4	9.0705		40.4	6.9447		40.4	4.4086		40.4	8.6041
	40.5	4.9604		40.5	9.1871		40.5	6.8806		40.5	4.3269		40.5	8.8638
	40.6	4.9987		40.6	8.9536		40.6	7.0049		40.6	4.4026		40.6	9.1479
	40.7	5.1556		40.7	8.5663		40.7	6.7605		40.7	4.2511		40.7	9.1527
	40.8	4.9901		40.8	8.64		40.8	6.9565		40.8	4.3754		40.8	9.2616
	40.9	5.0427		40.9	8.7752		40.9	6.8373		40.9	4.346		40.9	9.5604
	41	5.0702		41	8.6807		41	6.7905		41	4.4058		41	9.3449
	41.1	5.1784		41.1	8.7143		41.1	7.0213		41.1	4.25		41.1	9.3275
	41.2	5.4022		41.2	8.9327		41.2	6.8767		41.2	4.3758		41.2	9.3676
	41.3	5.4171		41.3	9.2073		41.3	7.0597		41.3	4.2192		41.3	9.3542
	41.4	5.3497		41.4	9.1729		41.4	7.0717		41.4	4.325		41.4	9.6032
	41.5	5.3942		41.5	9.1934		41.5	7.1422		41.5	4.1696		41.5	9.3124
	41.6	5.3653		41.6	8.9836		41.6	7.1058		41.6	3.9697		41.6	9.3131
	41.7	5.3602		41.7	9.1121		41.7	7.191		41.7	4.1053		41.7	9.4659
	41.8	5.1815		41.8	8.9286		41.8	6.8441		41.8	4.089		41.8	9.6549
	41.9	5.2136		41.9	8.877		41.9	6.7941		41.9	4.346		41.9	9.4049
	42	5.1218		42	8.8496		42	6.8861		42	4.0251		42	9.5576
	42.1	5.2419		42.1	8.6857		42.1	7.0762		42.1	4.0731		42.1	9.7832
	42.2	5.4918		42.2	8.6424		42.2	6.9996		42.2	3.9733		42.2	9.717
	42.3	5.7818		42.3	8.9667		42.3	6.8761		42.3	3.9533		42.3	9.8717
	42.4	5.6369		42.4	8.9206		42.4	6.9306		42.4	3.8702		42.4	9.7666
	42.5	5.5385		42.5	9.2408		42.5	7.032		42.5	3.9795		42.5	9.6546
	42.6	5.3959		42.6	9.0876		42.6	6.7581		42.6	3.7614		42.6	9.6731
	42.7	5.278		42.7	9.3554		42.7	6.6579		42.7	3.7914		42.7	9.9242
	42.8	5.2068		42.8	9.2386		42.8	6.5701		42.8	3.904		42.8	9.8713
	42.9	5.1097		42.9	9.0091		42.9	6.5484		42.9	3.7835		42.9	9.8824
	43	5.3138		43	8.9589		43	6.6209		43	3.6818		43	10.1643
	43.1	5.2425		43.1	8.8467		43.1	6.5895		43.1	3.785		43.1	10.2557
	43.2	5.4435		43.2	8.7188		43.2	6.4452		43.2	3.7548		43.2	10.3567
	43.3	5.2983		43.3	8.929		43.3	6.5095		43.3	3.7104		43.3	10.3418
	43.4	5.2843		43.4	8.95		43.4	6.424		43.4	3.6498		43.4	10.3071
	43.5	5.234		43.5	8.9261		43.5	6.5634		43.5	3.6703		43.5	10.1182
	43.6	5.2127		43.6	9.0047		43.6	6.4309		43.6	3.6308		43.6	10.2216
	43.7	5.2416		43.7	8.7341		43.7	6.1345		43.7	3.5931		43.7	9.9803
	43.8	5.1173		43.8	9.0226		43.8	6.3967		43.8	3.7653		43.8	9.9474
	43.9	5.1414		43.9	9.0037		43.9	6.6306		43.9	3.8196		43.9	9.7802
	44	5.141		44	9.167		44	6.8543		44	3.7181		44	9.667
	44.1	5.0142		44.1	9.0618		44.1	6.7027		44.1	3.7391		44.1	9.5693
	44.2	5.3349		44.2	9.0222		44.2	6.5986		44.2	3.7832		44.2	9.5798
	44.3	5.3185		44.3	9.0014		44.3	6.7262		44.3	3.8546		44.3	9.3985
	44.4	5.3814		44.4	9.105		44.4	6.8211		44.4	3.7884		44.4	9.5066
	44.5	5.3365		44.5	9.1831		44.5	6.9683		44.5	3.9138		44.5	9.5848
	44.6	5.1566		44.6	9.3769		44.6	6.8674		44.6	3.8909		44.6	9.7569
	44.7	4.9565		44.7	9.3934		44.7	6.9856		44.7	4.0164		44.7	9.497
	44.8	5.1111		44.8	9.4153		44.8	7.0588		44.8	4.1316		44.8	9.3494
	44.9	5.0312		44.9	9.5873		44.9	7.2398		44.9	4.0205		44.9	9.2777
	45	4.78		45	9.896		45	7.0537		45	4.287		45	9.3306
	45.1	4.8064		45.1	9.7541		45.1	7.0696		45.1	4.2905		45.1	9.4198
	45.2	4.831		45.2	9.7425		45.2	7.3682		45.2	4.4038		45.2	9.5619
	45.3	4.8548		45.3	9.818		45.3	7.1679		45.3	4.2392		45.3	9.4242
	45.4	4.9551		45.4	9.7347		45.4	7.1528		45.4	4.2311		45.4	9.7887
	45.5	4.8638		45.5	10.0878		45.5	7.0797		45.5	4.1031		45.5	9.6829
	45.6	4.8623		45.6	10.134		45.6	7.1955		45.6	4.3424		45.6	9.8435
	45.7	5.0078		45.7	10.0734		45.7	7.2596		45.7	4.4004		45.7	9.9728
	45.8	4.8737		45.8	9.8141		45.8	7.0338		45.8	4.322		45.8	9.7775
	45.9	4.9461		45.9	10.1074		45.9	7.1658		45.9	4.3256		45.9	9.9211
	46	5.0277		46	10.2437		46	6.9911		46	4.4596		46	9.455
	46.1	5.1885		46.1	10.3678		46.1	7.1226		46.1	4.4918		46.1	9.3022
	46.2	4.9519		46.2	10.5083		46.2	7.148		46.2	4.7345		46.2	9.3313
	46.3	5.1562		46.3	10.3458		46.3	7.3492		46.3	4.6129		46.3	9.6378
	46.4	5.3353		46.4	10.1472		46.4	7.3149		46.4	4.7218		46.4	9.6775
	46.5	5.2169		46.5	10.5518		46.5	7.3725		46.5	4.6274		46.5	9.5766
	46.6	5.0028		46.6	10.4052		46.6	7.3574		46.6	4.6362		46.6	9.4119
	46.7	5.0878		46.7	10.6112		46.7	7.3479		46.7	4.7916		46.7	9.3532
	46.8	5.0996		46.8	10.4423		46.8	7.3718		46.8	4.6487		46.8	9.361
	46.9	5.2256		46.9	10.5532		46.9	7.7213		46.9	4.5892		46.9	9.3728
	47	5.2364		47	10.654		47	7.5749		47	4.8431		47	9.4918
	47.1	5.2029		47.1	10.6825		47.1	7.2907		47.1	4.8183		47.1	9.2048
	47.2	5.27		47.2	10.4681		47.2	7.224		47.2	4.8612		47.2	8.8232
	47.3	5.373		47.3	10.4042		47.3	7.3545		47.3	4.8931		47.3	8.8935
	47.4	5.3867		47.4	10.4778		47.4	7.3348		47.4	4.802		47.4	8.6782
	47.5	5.4086		47.5	10.5101		47.5	7.2334		47.5	4.6638		47.5	8.6419
	47.6	5.3696		47.6	10.2332		47.6	7.2001		47.6	4.6344		47.6	9.053
	47.7	5.5965		47.7	10.1033		47.7	7.1842		47.7	4.6622		47.7	9.0995
	47.8	5.6622		47.8	10.0291		47.8	7.5238		47.8	4.774		47.8	9.4814
	47.9	5.4704		47.9	9.883		47.9	7.492		47.9	4.8489		47.9	9.4345
	48	5.2279		48	9.5423		48	7.3702		48	4.6067		48	9.2606
	48.1	5.2542		48.1	9.6614		48.1	7.4497		48.1	4.4845		48.1	9.5458
	48.2	5.1219		48.2	9.6593		48.2	7.2235		48.2	4.5879		48.2	9.5055
	48.3	5.3454		48.3	9.6012		48.3	7.0312		48.3	4.6953		48.3	9.6898
	48.4	5.4617		48.4	9.5744		48.4	7.1341		48.4	4.5856		48.4	9.8667
	48.5	5.4815		48.5	9.7523		48.5	7.3701		48.5	4.4898		48.5	9.8197
	48.6	5.5292		48.6	10.0684		48.6	7.4212		48.6	4.5946		48.6	9.4723
	48.7	5.5825		48.7	10.0423		48.7	7.4298		48.7	4.4914		48.7	9.7064
	48.8	5.4222		48.8	10.3255		48.8	7.8624		48.8	4.3861		48.8	9.5635
	48.9	5.3818		48.9	10.1093		48.9	8.0395		48.9	4.3401		48.9	9.5458
	49	5.3474		49	10.2482		49	7.7359		49	4.3277		49	9.7892
	49.1	5.4689		49.1	10.4571		49.1	7.805		49.1	4.2802		49.1	9.5598
	49.2	5.439		49.2	10.3645		49.2	7.7845		49.2	4.0917		49.2	9.5554
	49.3	5.4393		49.3	10.0817		49.3	7.6624		49.3	4.1632		49.3	9.6713
	49.4	5.5237		49.4	10.1144		49.4	7.6602		49.4	4.3483		49.4	9.8116
	49.5	5.4317		49.5	10.2912		49.5	7.6077		49.5	4.4876		49.5	9.9467
	49.6	5.1752		49.6	10.2916		49.6	7.6433		49.6	4.2101		49.6	10.0174
	49.7	5.1997		49.7	10.4247		49.7	7.5638		49.7	4.1183		49.7	10.1679
	49.8	5.1482		49.8	10.1814		49.8	7.5857		49.8	4.1641		49.8	10.3258
	49.9	5.2837		49.9	10.2373		49.9	7.6975		49.9	4.1843		49.9	10.493
	50	5.1236		50	10.101		50	7.649		50	4.1743		50	10.2736
	50.1	4.9846		50.1	10.1463		50.1	7.6591		50.1	4.1266		50.1	10.097
	50.2	4.9286		50.2	10.095		50.2	7.607		50.2	4.1137		50.2	10.2297
	50.3	4.813		50.3	10.3557		50.3	7.7864		50.3	4.2424		50.3	10.3608
	50.4	4.6453		50.4	10.408		50.4	7.7488		50.4	4.2318		50.4	10.5483
	50.5	4.6597		50.5	10.5683		50.5	7.668		50.5	4.2713		50.5	10.3101
	50.6	4.538		50.6	10.6417		50.6	7.8706		50.6	4.1225		50.6	10.4805
	50.7	4.3255		50.7	10.5198		50.7	7.9394		50.7	4.0591		50.7	10.2938
	50.8	4.0525		50.8	10.3959		50.8	7.9601		50.8	4.0381		50.8	9.9203
	50.9	4.1124		50.9	10.386		50.9	8.1039		50.9	4.2053		50.9	10.0161
	51	4.1398		51	10.4606		51	7.7608		51	4.4456		51	9.8495
	51.1	4.0412		51.1	10.5596		51.1	7.9261		51.1	4.0211		51.1	9.817
	51.2	4.0482		51.2	10.733		51.2	7.7556		51.2	4.1012		51.2	9.8002
	51.3	4.1402		51.3	10.5512		51.3	7.6786		51.3	3.8952		51.3	9.9057
	51.4	4.2709		51.4	10.7156		51.4	7.429		51.4	3.8274		51.4	9.8238
	51.5	4.1471		51.5	10.5537		51.5	7.48		51.5	3.9606		51.5	9.6772
	51.6	4.0297		51.6	10.4556		51.6	7.4662		51.6	3.9002		51.6	9.503
	51.7	4.2351		51.7	10.2887		51.7	7.7048		51.7	3.9852		51.7	9.5047
	51.8	4.3573		51.8	10.2538		51.8	7.7414		51.8	3.9983		51.8	9.526
	51.9	4.378		51.9	10.3041		51.9	7.9061		51.9	4.2257		51.9	9.4863
	52	4.3464		52	10.4686		52	8.0409		52	4.0738		52	9.5521
	52.1	4.3952		52.1	10.5451		52.1	7.9401		52.1	4.1432		52.1	9.555
	52.2	4.5293		52.2	10.4031		52.2	8.0442		52.2	4.252		52.2	9.6218
	52.3	4.3888		52.3	10.5054		52.3	8.3272		52.3	4.3675		52.3	9.5453
	52.4	4.2452		52.4	10.5942		52.4	7.9721		52.4	4.2722		52.4	9.6827
	52.5	4.279		52.5	10.7027		52.5	7.9852		52.5	4.2768		52.5	9.55
	52.6	4.1015		52.6	10.5947		52.6	7.942		52.6	3.9623		52.6	9.6932
	52.7	4.0573		52.7	10.8778		52.7	7.7596		52.7	3.9312		52.7	9.5492
	52.8	4.0772		52.8	10.7861		52.8	7.723		52.8	4.077		52.8	9.5068
	52.9	4.0296		52.9	10.48		52.9	7.7887		52.9	4.1845		52.9	9.6985
	53	3.9907		53	10.1593		53	7.8984		53	4.3107		53	9.6226
	53.1	4.1639		53.1	10.3499		53.1	7.6839		53.1	4.4846		53.1	9.6501
	53.2	3.8998		53.2	10.5223		53.2	7.672		53.2	4.6033		53.2	9.8005
	53.3	4.011		53.3	10.2432		53.3	7.4884		53.3	4.6286		53.3	9.9303
	53.4	4.1654		53.4	10.2299		53.4	7.5595		53.4	4.8717		53.4	9.9773
	53.5	4.2048		53.5	10.4412		53.5	7.5059		53.5	5.0603		53.5	9.8786
	53.6	4.2697		53.6	10.664		53.6	7.2571		53.6	5.203		53.6	9.7329
	53.7	4.3058		53.7	10.6363		53.7	7.51		53.7	5.4116		53.7	9.7493
	53.8	4.2112		53.8	10.5405		53.8	7.2279		53.8	5.5535		53.8	9.7294
	53.9	4.3047		53.9	10.8759		53.9	7.1611		53.9	5.5497		53.9	9.7251
	54	4.2517		54	10.52		54	7.3319		54	5.6648		54	9.8382
	54.1	4.1937		54.1	10.6568		54.1	7.3534		54.1	5.6186		54.1	9.7269
	54.2	4.239		54.2	10.5906		54.2	7.0695		54.2	5.9592		54.2	9.8228
	54.3	4.2808		54.3	10.8909		54.3	7.2183		54.3	5.764		54.3	9.7431
	54.4	4.3711		54.4	10.8901		54.4	6.8873		54.4	5.7947		54.4	9.7397
	54.5	4.3254		54.5	10.6881		54.5	7.1804		54.5	5.8107		54.5	9.5514
	54.6	4.0695		54.6	10.6588		54.6	7.1908		54.6	5.7846		54.6	9.2306
	54.7	4.2429		54.7	10.6744		54.7	7.1493		54.7	5.7484		54.7	9.5366
	54.8	4.1161		54.8	10.6883		54.8	6.9511		54.8	5.8672		54.8	9.3528
	54.9	4.309		54.9	10.6748		54.9	6.9161		54.9	5.7079		54.9	9.2172
	55	4.4284		55	10.5062		55	7.0396		55	5.5155		55	9.0006
	55.1	4.5446		55.1	10.2699		55.1	6.6871		55.1	5.4054		55.1	9.0401
	55.2	4.6432		55.2	10.6254		55.2	6.7703		55.2	5.5372		55.2	8.7594
	55.3	4.6679		55.3	10.4404		55.3	6.9083		55.3	5.5308		55.3	8.9581
	55.4	4.5045		55.4	10.65		55.4	6.8361		55.4	5.6619		55.4	9.2002
	55.5	4.4272		55.5	10.4443		55.5	6.7604		55.5	5.8382		55.5	9.1174
	55.6	4.3428		55.6	10.4332		55.6	6.7793		55.6	5.7663		55.6	9.145
	55.7	4.0718		55.7	10.5542		55.7	7.0868		55.7	5.6508		55.7	9.0671
	55.8	4.1448		55.8	10.6142		55.8	7.1709		55.8	5.6473		55.8	8.9526
	55.9	4.2583		55.9	10.7786		55.9	6.8801		55.9	5.5623		55.9	9.0513
	56	4.2288		56	10.7763		56	7.1106		56	5.4422		56	8.897
	56.1	3.9907		56.1	10.8		56.1	6.9676		56.1	5.57		56.1	8.99
	56.2	4.0029		56.2	10.5664		56.2	6.9062		56.2	5.5613		56.2	9.0791
	56.3	4.1879		56.3	10.9849		56.3	7.0098		56.3	5.6129		56.3	9.1528
	56.4	4.1302		56.4	11.0101		56.4	7.0054		56.4	5.4188		56.4	9.1843
	56.5	4.093		56.5	10.9244		56.5	7.0373		56.5	5.5215		56.5	8.9436
	56.6	4.0663		56.6	10.9006		56.6	6.895		56.6	5.6255		56.6	9.2649
	56.7	4.0274		56.7	10.5844		56.7	6.9064		56.7	5.429		56.7	9.3008
	56.8	3.8472		56.8	10.6886		56.8	6.7514		56.8	5.4721		56.8	9.1973
	56.9	3.8614		56.9	10.8424		56.9	6.6388		56.9	5.6338		56.9	9.2422
	57	3.8703		57	10.8282		57	6.8659		57	5.5788		57	9.3856
	57.1	3.8023		57.1	10.9264		57.1	6.9531		57.1	5.5266		57.1	9.4905
	57.2	3.9756		57.2	10.8412		57.2	6.8466		57.2	5.6586		57.2	9.5103
	57.3	4.0504		57.3	11.0945		57.3	6.6743		57.3	5.5401		57.3	9.3272
	57.4	3.939		57.4	11.2885		57.4	6.6708		57.4	5.4397		57.4	9.1618
	57.5	4.0577		57.5	11.2192		57.5	6.723		57.5	5.3617		57.5	9.1031
	57.6	4.2038		57.6	11.2594		57.6	6.4236		57.6	5.4251		57.6	9.1582
	57.7	4.2544		57.7	11.122		57.7	6.2254		57.7	5.6252		57.7	9.3052
	57.8	4.1718		57.8	11.2419		57.8	6.394		57.8	5.8013		57.8	9.1757
	57.9	4.1027		57.9	11.071		57.9	6.4073		57.9	5.793		57.9	8.9422
	58	4.0049		58	11.1886		58	6.809		58	5.9624		58	9.0975
	58.1	3.9051		58.1	11.3927		58.1	6.7543		58.1	5.8702		58.1	9.16
	58.2	3.9424		58.2	11.2499		58.2	6.761		58.2	5.9703		58.2	9.3061
	58.3	3.7397		58.3	11.6102		58.3	6.5626		58.3	6.1355		58.3	9.287
	58.4	3.7717		58.4	11.5025		58.4	6.4114		58.4	6.1407		58.4	9.4295
	58.5	4.2091		58.5	11.3215		58.5	6.5787		58.5	6.04		58.5	9.3036
	58.6	4.3042		58.6	11.405		58.6	6.7497		58.6	5.9743		58.6	9.4786
	58.7	4.1791		58.7	11.2546		58.7	6.5902		58.7	5.9031		58.7	9.1886
	58.8	4.2436		58.8	11.3981		58.8	6.4805		58.8	5.727		58.8	9.3642
	58.9	4.3086		58.9	11.7171		58.9	6.8735		58.9	5.5461		58.9	9.1265
	59	4.2059		59	11.8742		59	6.5353		59	5.5055		59	9.3806
	59.1	4.4214		59.1	11.8988		59.1	6.3702		59.1	5.5394		59.1	9.3069
	59.2	4.5037		59.2	12.0254		59.2	6.3259		59.2	5.4789		59.2	9.4892
	59.3	4.4502		59.3	11.9582		59.3	6.6556		59.3	5.5727		59.3	9.4116
	59.4	4.6886		59.4	11.9899		59.4	6.5151		59.4	5.6454		59.4	9.1981
	59.5	4.6763		59.5	11.7366		59.5	6.5508		59.5	5.7039		59.5	9.1948
	59.6	5.0528		59.6	11.9222		59.6	6.3392		59.6	5.6738		59.6	8.9681
	59.7	5.048		59.7	11.879		59.7	6.4745		59.7	5.5197		59.7	9.1012
	59.8	5.1333		59.8	12.1008		59.8	6.5335		59.8	5.8044		59.8	9.01
	59.9	5.2897		59.9	12.2755		59.9	6.2731		59.9	5.5382		59.9	9.022
	60	5.3142		60	12.4963		60	6.2298		60	5.6181		60	9.019
	60.1	5.1301		60.1	12.6817		60.1	6.036		60.1	5.7998		60.1	8.8559
	60.2	5.0684		60.2	12.8276		60.2	5.8192		60.2	5.7992		60.2	8.8164
	60.3	4.9542		60.3	12.8449		60.3	5.9469		60.3	5.758		60.3	8.6229
	60.4	5.0804		60.4	12.8367		60.4	6.0365		60.4	5.492		60.4	8.6397
	60.5	5.1779		60.5	12.4759		60.5	6.3103		60.5	5.6484		60.5	8.555
	60.6	5.0681		60.6	12.5585		60.6	6.4899		60.6	5.4436		60.6	8.5554
	60.7	5.0405		60.7	12.3382		60.7	6.429		60.7	5.4204		60.7	8.2894
	60.8	4.868		60.8	12.4548		60.8	6.5744		60.8	5.5702		60.8	8.1934
	60.9	4.928		60.9	12.378		60.9	6.5566		60.9	5.5326		60.9	8.2573
	61	5.0622		61	12.3138		61	6.3569		61	5.5877		61	8.2544
	61.1	5.2378		61.1	12.3282		61.1	6.4223		61.1	5.5441		61.1	8.3942
	61.2	5.2725		61.2	12.2649		61.2	6.3335		61.2	5.4061		61.2	8.6456
	61.3	5.5176		61.3	12.3991		61.3	6.6131		61.3	5.3817		61.3	8.3127
	61.4	5.4216		61.4	12.4036		61.4	6.7605		61.4	5.2729		61.4	8.0682
	61.5	5.5211		61.5	12.1973		61.5	6.9622		61.5	5.3932		61.5	8.3159
	61.6	5.4787		61.6	12.4323		61.6	6.9054		61.6	5.2541		61.6	8.6562
	61.7	5.3918		61.7	12.464		61.7	7.1011		61.7	5.1657		61.7	8.188
	61.8	5.2302		61.8	12.6621		61.8	7.1864		61.8	5.2328		61.8	8.4053
	61.9	4.9762		61.9	12.7576		61.9	7.1939		61.9	5.2506		61.9	8.654
	62	5.1266		62	12.8574		62	7.1855		62	5.3615		62	8.5651
	62.1	5.0904		62.1	12.8987		62.1	7.2428		62.1	5.5117		62.1	8.3233
	62.2	5.2762		62.2	12.7131		62.2	7.0841		62.2	5.5213		62.2	8.5137
	62.3	5.311		62.3	13.0213		62.3	7.2374		62.3	5.6664		62.3	8.4862
	62.4	5.4199		62.4	12.9937		62.4	6.9525		62.4	5.626		62.4	8.4197
	62.5	5.3127		62.5	12.9242		62.5	7.1239		62.5	5.399		62.5	8.3198
	62.6	5.5953		62.6	12.5244		62.6	7.2981		62.6	5.3356		62.6	8.4703
	62.7	5.5511		62.7	12.6011		62.7	7.1746		62.7	5.3547		62.7	8.2844
	62.8	5.7402		62.8	12.7142		62.8	7.0695		62.8	5.4349		62.8	8.2514
	62.9	5.8387		62.9	13.0283		62.9	7.2802		62.9	5.3214		62.9	8.2912
	63	5.8383		63	13.1534		63	7.3437		63	5.3042		63	8.3081
	63.1	5.9473		63.1	13.2768		63.1	7.2286		63.1	5.1173		63.1	8.3488
	63.2	5.961		63.2	13.1899		63.2	7.3548		63.2	4.9387		63.2	8.2966
	63.3	6.0557		63.3	13.1317		63.3	7.275		63.3	4.8874		63.3	8.4493
	63.4	5.8594		63.4	13.4434		63.4	7.4172		63.4	4.9566		63.4	8.3648
	63.5	5.8362		63.5	13.4046		63.5	7.1351		63.5	5.1501		63.5	8.1692
	63.6	6.0934		63.6	13.4163		63.6	7.227		63.6	5.1068		63.6	8.1276
	63.7	5.9951		63.7	13.0062		63.7	7.0612		63.7	4.9648		63.7	7.8444
	63.8	6.0645		63.8	12.8821		63.8	7.056		63.8	4.8517		63.8	8.0469
	63.9	6.1484		63.9	12.4962		63.9	7.2288		63.9	4.8705		63.9	7.9889
	64	6.2274		64	12.5021		64	7.1829		64	5.0088		64	8.1414
	64.1	6.0587		64.1	12.5776		64.1	7.5372		64.1	5.1434		64.1	8.03
	64.2	6.1044		64.2	12.2009		64.2	7.6251		64.2	5.0097		64.2	8.0869
	64.3	6.2102		64.3	12.2535		64.3	7.6789		64.3	5.2231		64.3	8.1493
	64.4	6.4457		64.4	12.3943		64.4	7.6927		64.4	5.305		64.4	7.8835
	64.5	6.6201		64.5	12.1863		64.5	7.732		64.5	5.2334		64.5	8.0412
	64.6	6.6246		64.6	12.1158		64.6	7.505		64.6	5.2776		64.6	8.0753
	64.7	6.7233		64.7	12.0414		64.7	7.2024		64.7	5.3587		64.7	8.0268
	64.8	6.6339		64.8	11.8937		64.8	7.2547		64.8	5.5271		64.8	8.063
	64.9	6.5924		64.9	11.9993		64.9	7.373		64.9	5.6003		64.9	8.0978
	65	6.6003		65	11.881		65	7.3835		65	5.3256		65	7.9995
	65.1	6.4514		65.1	11.8809		65.1	7.4358		65.1	5.2826		65.1	7.6873
	65.2	6.3055		65.2	12.0253		65.2	7.5583		65.2	5.1891		65.2	7.5004
	65.3	6.2017		65.3	12.34		65.3	7.5557		65.3	5.0752		65.3	7.5252
	65.4	6.2501		65.4	12.598		65.4	7.6395		65.4	5.1089		65.4	7.5462
	65.5	6.1239		65.5	12.6355		65.5	7.58		65.5	5.1441		65.5	7.6626
	65.6	6.0928		65.6	12.3618		65.6	7.6198		65.6	5.2318		65.6	7.4359
	65.7	6.1756		65.7	12.3642		65.7	7.7512		65.7	5.3721		65.7	7.2732
	65.8	6.1047		65.8	12.3398		65.8	7.6379		65.8	5.4817		65.8	7.2874
	65.9	6.2389		65.9	12.2751		65.9	7.8153		65.9	5.3845		65.9	7.2895
	66	6.4062		66	12.1796		66	7.5694		66	5.2189		66	7.2902
	66.1	6.4789		66.1	12.5042		66.1	7.3529		66.1	5.1145		66.1	7.2191
	66.2	6.5862		66.2	13.0698		66.2	7.4736		66.2	5.2447		66.2	7.1689
	66.3	6.7475		66.3	13.0682		66.3	7.5116		66.3	5.5324		66.3	7.4456
	66.4	6.5428		66.4	12.8738		66.4	7.5007		66.4	5.5645		66.4	7.3061
	66.5	6.6567		66.5	12.6181		66.5	7.3182		66.5	5.5504		66.5	7.4129
	66.6	6.5564		66.6	12.4584		66.6	7.4967		66.6	5.6215		66.6	7.5222
	66.7	6.4798		66.7	12.5085		66.7	7.5211		66.7	5.6508		66.7	7.3541
	66.8	6.2948		66.8	12.6282		66.8	7.3952		66.8	5.637		66.8	7.4538
	66.9	6.5182		66.9	12.4221		66.9	7.4497		66.9	5.7889		66.9	7.8034
	67	6.4623		67	12.3146		67	7.8624		67	6.1016		67	7.9181
	67.1	6.574		67.1	12.6248		67.1	8.0805		67.1	5.8594		67.1	7.7347
	67.2	6.5569		67.2	12.449		67.2	7.8268		67.2	5.635		67.2	7.5971
	67.3	6.2208		67.3	12.266		67.3	7.8022		67.3	5.7956		67.3	7.694
	67.4	6.414		67.4	12.6002		67.4	7.751		67.4	5.7126		67.4	7.827
	67.5	6.5437		67.5	12.5889		67.5	7.8058		67.5	5.6103		67.5	7.6879
	67.6	6.6256		67.6	12.5623		67.6	7.7084		67.6	5.3754		67.6	7.5309
	67.7	6.6124		67.7	12.5248		67.7	7.9306		67.7	5.5096		67.7	7.367
	67.8	6.3927		67.8	12.5263		67.8	7.8126		67.8	5.3801		67.8	7.2953
	67.9	6.5868		67.9	12.8548		67.9	7.829		67.9	5.2074		67.9	7.1226
	68	6.5082		68	12.8342		68	7.7983		68	5.1786		68	7.2846
	68.1	6.4674		68.1	12.7678		68.1	7.7336		68.1	5.285		68.1	7.1048
	68.2	6.4693		68.2	12.8625		68.2	7.6038		68.2	5.18		68.2	7.0453
	68.3	6.5435		68.3	12.5396		68.3	7.6588		68.3	5.4156		68.3	6.9359
	68.4	6.5912		68.4	12.5927		68.4	7.8557		68.4	5.1912		68.4	6.9176
	68.5	6.3918		68.5	12.507		68.5	7.8561		68.5	5.2863		68.5	7.0193
	68.6	6.5628		68.6	12.4525		68.6	7.6839		68.6	5.2683		68.6	6.9525
	68.7	6.7869		68.7	12.4469		68.7	7.8168		68.7	5.3757		68.7	7.1892
	68.8	6.7969		68.8	12.1043		68.8	7.8817		68.8	5.3716		68.8	7.1273
	68.9	6.6894		68.9	12.1984		68.9	7.6667		68.9	5.2873		68.9	7.4071
	69	6.509		69	12.1341		69	7.5443		69	5.2246		69	7.2971
	69.1	6.6233		69.1	12.1515		69.1	7.8006		69.1	5.2921		69.1	7.5878
	69.2	6.4399		69.2	12.1574		69.2	7.479		69.2	5.3334		69.2	7.6836
	69.3	6.5022		69.3	12.0503		69.3	7.474		69.3	5.1517		69.3	7.7214
	69.4	6.662		69.4	11.8723		69.4	7.3249		69.4	5.1985		69.4	7.3822
	69.5	6.6181		69.5	11.7128		69.5	7.5444		69.5	5.036		69.5	7.2689
	69.6	6.6364		69.6	12.015		69.6	7.6904		69.6	5.2141		69.6	7.0295
	69.7	6.83		69.7	11.9567		69.7	7.7639		69.7	5.2825		69.7	7.1665
	69.8	6.887		69.8	11.6713		69.8	7.9296		69.8	5.3095		69.8	7.1295
	69.9	6.8889		69.9	12.0404		69.9	7.8662		69.9	5.2408		69.9	7.3983
	70	6.799		70	11.9496		70	7.7064		70	5.4365		70	7.3338
	70.1	7.1835		70.1	12.0983		70.1	7.5207		70.1	5.2204		70.1	7.2298
	70.2	6.9892		70.2	12.012		70.2	7.4326		70.2	5.1913		70.2	6.9837
	70.3	7.0617		70.3	12.1445		70.3	7.3368		70.3	5.285		70.3	6.9456
	70.4	7.1232		70.4	12.2471		70.4	7.4732		70.4	5.3428		70.4	7.0382
	70.5	7.1341		70.5	11.7842		70.5	7.5454		70.5	5.3719		70.5	6.8189
	70.6	7.2154		70.6	12.2288		70.6	7.5685		70.6	5.4982		70.6	6.9132
	70.7	7.0886		70.7	12.3779		70.7	7.2319		70.7	5.6149		70.7	6.8119
	70.8	7.2248		70.8	12.2542		70.8	7.3593		70.8	5.5356		70.8	6.8465
	70.9	7.2131		70.9	12.2448		70.9	7.3812		70.9	5.4038		70.9	6.8347
	71	7.1242		71	12.0861		71	7.5514		71	5.241		71	6.7665
	71.1	7.0716		71.1	12.1053		71.1	7.5517		71.1	5.2878		71.1	6.7549
	71.2	6.92		71.2	12.2886		71.2	7.5825		71.2	5.3349		71.2	6.2946
	71.3	6.988		71.3	12.3964		71.3	7.7199		71.3	5.3928		71.3	6.3292
	71.4	6.868		71.4	12.3252		71.4	7.7064		71.4	5.496		71.4	6.2959
	71.5	7.0238		71.5	12.3831		71.5	7.4369		71.5	5.3453		71.5	6.0246
	71.6	6.8995		71.6	12.1979		71.6	7.564		71.6	5.3725		71.6	5.8537
	71.7	7.0614		71.7	12.2742		71.7	7.5345		71.7	5.2922		71.7	5.8081
	71.8	7.0479		71.8	12.2007		71.8	7.5588		71.8	4.9483		71.8	5.6852
	71.9	7.2311		71.9	12.3316		71.9	7.6698		71.9	4.9473		71.9	5.4555
	72	7.1942		72	12.3193		72	7.4322		72	5.0451		72	5.3448
	72.1	7.4455		72.1	12.2655		72.1	7.3797		72.1	5.1696		72.1	5.5874
	72.2	7.3451		72.2	12.0622		72.2	7.6761		72.2	5.1058		72.2	5.5325
	72.3	7.5819		72.3	12.0899		72.3	7.1471		72.3	5.1276		72.3	5.4487
	72.4	7.5247		72.4	12.1731		72.4	7.2367		72.4	5.342		72.4	5.5125
	72.5	7.4523		72.5	12.3769		72.5	7.1705		72.5	5.2634		72.5	5.5324
	72.6	7.5415		72.6	12.3285		72.6	7.2225		72.6	5.0776		72.6	5.5308
	72.7	7.6074		72.7	12.3786		72.7	7.0162		72.7	5.2084		72.7	5.3378
	72.8	7.5082		72.8	12.5177		72.8	7.0862		72.8	5.1462		72.8	5.4025
	72.9	7.4436		72.9	12.4036		72.9	6.8612		72.9	5.0032		72.9	5.2382
	73	7.5281		73	12.5595		73	6.857		73	5.0593		73	5.0523
	73.1	7.4853		73.1	12.2496		73.1	6.9116		73.1	4.8475		73.1	5.1039
	73.2	7.3205		73.2	12.5264		73.2	6.8415		73.2	4.9652		73.2	5.2723
	73.3	7.172		73.3	12.7205		73.3	6.5894		73.3	4.9907		73.3	5.2082
	73.4	7.1282		73.4	12.6389		73.4	6.6457		73.4	4.8678		73.4	5.2222
	73.5	7.059		73.5	12.6746		73.5	6.2981		73.5	4.9649		73.5	5.2383
	73.6	7.487		73.6	13.106		73.6	6.4879		73.6	5.0293		73.6	5.2444
	73.7	7.5295		73.7	12.7148		73.7	6.363		73.7	5.0079		73.7	5.212
	73.8	7.6425		73.8	13.0406		73.8	6.2576		73.8	5.0614		73.8	5.249
	73.9	7.6977		73.9	13.164		73.9	6.2035		73.9	4.7887		73.9	5.3552
	74	7.8865		74	13.2266		74	6.2825		74	4.7718		74	5.4093
	74.1	7.5655		74.1	13.3016		74.1	6.2424		74.1	4.918		74.1	5.2331
	74.2	7.7121		74.2	13.1661		74.2	6.073		74.2	4.865		74.2	5.1189
	74.3	7.7458		74.3	13.1183		74.3	5.948		74.3	4.8805		74.3	5.1314
	74.4	7.9732		74.4	13.3474		74.4	6.0392		74.4	5.0064		74.4	5.3368
	74.5	7.8248		74.5	13.1077		74.5	6.0071		74.5	4.9645		74.5	5.1869
	74.6	7.6942		74.6	13.1035		74.6	6.224		74.6	4.8656		74.6	5.1916
	74.7	7.5906		74.7	13.0857		74.7	6.3242		74.7	5.0375		74.7	5.3408
	74.8	7.7269		74.8	13.1261		74.8	6.3002		74.8	4.9891		74.8	5.1426
	74.9	7.8979		74.9	12.8638		74.9	6.3715		74.9	4.8369		74.9	5.2692
	75	7.9754		75	13.3439		75	6.5993		75	4.968		75	5.2216
	75.1	8.0306		75.1	13.4923		75.1	6.7122		75.1	5.0075		75.1	5.0694
	75.2	8.1345		75.2	13.6113		75.2	6.4941		75.2	4.8844		75.2	5.0781
	75.3	8.0424		75.3	13.3152		75.3	6.5738		75.3	4.7041		75.3	5.0858
	75.4	7.917		75.4	13.1062		75.4	6.6879		75.4	4.7438		75.4	5.1781
	75.5	8.0944		75.5	12.8669		75.5	6.8289		75.5	4.9206		75.5	5.0812
	75.6	8.1121		75.6	13.2667		75.6	6.6525		75.6	4.666		75.6	5.1602
	75.7	8.1874		75.7	13.3404		75.7	6.6633		75.7	4.8466		75.7	5.2764
	75.8	8.1971		75.8	13.2834		75.8	7.0096		75.8	4.8564		75.8	5.1201
	75.9	8.3777		75.9	13.4891		75.9	6.9124		75.9	4.9247		75.9	5.0364
	76	8.2453		76	13.5825		76	6.853		76	5.0837		76	4.9077
	76.1	8.1721		76.1	13.3131		76.1	7.0428		76.1	5.0156		76.1	4.8047
	76.2	8.2883		76.2	13.0236		76.2	7.1028		76.2	5.1932		76.2	4.848
	76.3	7.9955		76.3	13.2817		76.3	7.0342		76.3	5		76.3	4.7668
	76.4	7.9854		76.4	13.0327		76.4	7.0791		76.4	4.8507		76.4	4.4224
	76.5	8.1596		76.5	12.8426		76.5	6.9983		76.5	4.9436		76.5	4.4898
	76.6	8.1206		76.6	12.9112		76.6	6.8912		76.6	5.0018		76.6	4.5015
	76.7	8.1445		76.7	12.9823		76.7	6.7698		76.7	4.834		76.7	4.375
	76.8	8.1823		76.8	13.1639		76.8	6.8032		76.8	4.9021		76.8	4.503
	76.9	8.1842		76.9	13.274		76.9	6.6531		76.9	4.8622		76.9	4.7358
	77	8.1827		77	13.2301		77	6.6363		77	4.8484		77	4.2801
	77.1	8.076		77.1	13.143		77.1	6.6541		77.1	4.8613		77.1	4.1266
	77.2	8.1156		77.2	13.0533		77.2	6.5077		77.2	4.7812		77.2	4.1117
	77.3	7.7728		77.3	13.1287		77.3	6.3909		77.3	4.8975		77.3	4.1225
	77.4	7.901		77.4	12.9074		77.4	6.589		77.4	4.9036		77.4	4.0143
	77.5	8.1032		77.5	12.5037		77.5	6.479		77.5	4.9154		77.5	4.0019
	77.6	7.9879		77.6	12.7138		77.6	6.6954		77.6	4.9415		77.6	3.9784
	77.7	8.2723		77.7	12.6144		77.7	6.6688		77.7	4.8207		77.7	4.0134
	77.8	8.4174		77.8	12.2626		77.8	6.6212		77.8	4.8518		77.8	3.8816
	77.9	8.4371		77.9	12.0082		77.9	6.6977		77.9	4.9694		77.9	3.8718
	78	8.4596		78	12.1504		78	6.8745		78	4.9685		78	3.9511
	78.1	8.2372		78.1	12.3429		78.1	6.9811		78.1	4.9704		78.1	3.8231
	78.2	8.1018		78.2	11.8967		78.2	6.9501		78.2	4.7952		78.2	3.9358
	78.3	8.4026		78.3	11.7186		78.3	7.0926		78.3	4.9899		78.3	4.0277
	78.4	8.3652		78.4	11.7638		78.4	7.1439		78.4	5.1794		78.4	3.9819
	78.5	8.3878		78.5	11.7534		78.5	7.1569		78.5	5.4023		78.5	3.9486
	78.6	8.2525		78.6	11.8176		78.6	7.1903		78.6	5.4006		78.6	3.8919
	78.7	7.8749		78.7	11.7347		78.7	7.3202		78.7	5.3868		78.7	3.8426
	78.8	7.6685		78.8	11.8277		78.8	7.3519		78.8	5.2766		78.8	3.8862
	78.9	7.5865		78.9	11.5052		78.9	6.8669		78.9	5.3191		78.9	4.0176
	79	7.7117		79	11.2762		79	7.0894		79	5.5449		79	4.0866
	79.1	7.7903		79.1	11.268		79.1	6.8785		79.1	5.6605		79.1	4.177
	79.2	8.2511		79.2	11.4534		79.2	6.7057		79.2	5.6332		79.2	4.0526
	79.3	8.3086		79.3	11.5714		79.3	6.8451		79.3	5.5153		79.3	3.9875
	79.4	8.1777		79.4	11.6948		79.4	6.9006		79.4	5.5913		79.4	3.9291
	79.5	8.3134		79.5	11.5708		79.5	6.7297		79.5	5.7065		79.5	3.7929
	79.6	8.497		79.6	11.378		79.6	7.0146		79.6	5.4848		79.6	3.8376
	79.7	8.3306		79.7	11.5741		79.7	7.2104		79.7	5.4071		79.7	3.5961
	79.8	8.5925		79.8	11.4874		79.8	6.991		79.8	5.5312		79.8	3.7541
	79.9	8.2926		79.9	11.5987		79.9	6.7454		79.9	5.5153		79.9	3.6146
	80	8.22		80	11.3349		80	6.6761		80	5.5638		80	3.5667
	80.1	8.3465		80.1	11.3628		80.1	6.9967		80.1	5.5386		80.1	3.5774
	80.2	8.4774		80.2	11.5138		80.2	6.9236		80.2	5.5492		80.2	3.6587
	80.3	8.2444		80.3	11.6315		80.3	7.0713		80.3	5.2098		80.3	3.6981
	80.4	8.0963		80.4	11.5894		80.4	7.0717		80.4	5.3007		80.4	3.8502
	80.5	8.1369		80.5	11.6728		80.5	7.0418		80.5	5.175		80.5	3.7779
	80.6	7.9112		80.6	11.4795		80.6	7.0619		80.6	5.2477		80.6	3.6705
	80.7	7.7367		80.7	11.2715		80.7	7.201		80.7	5.1889		80.7	3.6035
	80.8	7.8679		80.8	11.3401		80.8	7.0886		80.8	5.0696		80.8	3.6153
	80.9	8.0308		80.9	11.4068		80.9	7.2254		80.9	5.3168		80.9	3.6917
	81	8.0206		81	11.5559		81	7.1867		81	5.3289		81	3.6395
	81.1	8.4727		81.1	11.4802		81.1	7.11		81.1	5.4893		81.1	3.8305
	81.2	8.3795		81.2	11.2636		81.2	7.0649		81.2	5.3396		81.2	3.9366
	81.3	8.1278		81.3	11.4774		81.3	7.0307		81.3	5.1902		81.3	3.8518
	81.4	8.254		81.4	11.6504		81.4	6.9167		81.4	5.285		81.4	3.8163
	81.5	8.3229		81.5	11.5773		81.5	6.6987		81.5	5.1655		81.5	3.888
	81.6	8.3405		81.6	11.6664		81.6	6.6294		81.6	5.1149		81.6	3.6953
	81.7	8.1797		81.7	11.4722		81.7	6.7284		81.7	4.8427		81.7	3.537
	81.8	8.3905		81.8	11.3854		81.8	6.6135		81.8	4.7733		81.8	3.333
	81.9	8.5104		81.9	11.5733		81.9	6.5695		81.9	4.9492		81.9	3.5265
	82	8.4298		82	11.8854		82	6.5697		82	4.8428		82	3.4054
	82.1	8.6109		82.1	11.6566		82.1	6.6795		82.1	4.7485		82.1	3.3085
	82.2	8.6121		82.2	11.9137		82.2	6.7411		82.2	4.8142		82.2	3.481
	82.3	8.5627		82.3	11.8331		82.3	6.9403		82.3	4.9121		82.3	3.5928
	82.4	8.4701		82.4	11.5951		82.4	6.9975		82.4	4.8622		82.4	3.6564
	82.5	8.6056		82.5	11.6073		82.5	6.8938		82.5	4.9217		82.5	3.4207
	82.6	8.5667		82.6	11.5247		82.6	6.776		82.6	4.7725		82.6	3.4718
	82.7	8.6285		82.7	11.59		82.7	6.7258		82.7	4.9448		82.7	3.5284
	82.8	8.6591		82.8	11.5548		82.8	6.7398		82.8	4.9735		82.8	3.6821
	82.9	8.8392		82.9	11.2347		82.9	6.862		82.9	4.8581		82.9	3.7267
	83	9.0328		83	11.1464		83	6.7443		83	5.0451		83	3.8057
	83.1	9.1081		83.1	11.1731		83.1	6.7731		83.1	5.3025		83.1	3.7752
	83.2	9.2716		83.2	11.0966		83.2	6.724		83.2	5.1674		83.2	3.6966
	83.3	9.0975		83.3	11.0361		83.3	6.8901		83.3	4.8402		83.3	3.8194
	83.4	9.2975		83.4	11.0785		83.4	6.8166		83.4	4.8965		83.4	3.9536
	83.5	9.2427		83.5	11.0914		83.5	6.5629		83.5	4.7951		83.5	3.8208
	83.6	9.054		83.6	10.9807		83.6	6.5901		83.6	5.0673		83.6	3.9467
	83.7	9.0956		83.7	11.1054		83.7	6.3993		83.7	4.9637		83.7	3.8383
	83.8	9.0556		83.8	11.2297		83.8	6.3958		83.8	4.8495		83.8	4.0641
	83.9	9.0738		83.9	11.2356		83.9	6.7582		83.9	4.8802		83.9	4.1251
	84	9.0186		84	11.2264		84	6.7968		84	4.8922		84	4.1608
	84.1	8.8575		84.1	11.3119		84.1	6.7752		84.1	5.0502		84.1	4.3249
	84.2	9.0656		84.2	11.5403		84.2	6.554		84.2	5.0133		84.2	4.6211
	84.3	9.0458		84.3	11.4284		84.3	6.5534		84.3	5.2697		84.3	4.8824
	84.4	9.1234		84.4	11.4607		84.4	6.7345		84.4	5.3902		84.4	4.7521
	84.5	8.9733		84.5	11.0419		84.5	6.608		84.5	5.3666		84.5	4.7485
	84.6	9.0733		84.6	11.2026		84.6	6.7015		84.6	5.2371		84.6	4.8768
	84.7	9.2134		84.7	11.0216		84.7	6.6061		84.7	5.3082		84.7	4.8923
	84.8	9.3886		84.8	11.1223		84.8	6.7853		84.8	5.317		84.8	4.8351
	84.9	9.2457		84.9	11.1024		84.9	6.7799		84.9	5.6007		84.9	4.7222
	85	9.4187		85	10.9789		85	6.6927		85	5.558		85	4.9377
	85.1	9.3999		85.1	11.3493		85.1	6.7355		85.1	5.7767		85.1	4.8406
	85.2	9.3084		85.2	11.0275		85.2	6.7607		85.2	5.739		85.2	4.6811
	85.3	9.4102		85.3	11.0274		85.3	6.6994		85.3	5.6727		85.3	4.6978
	85.4	9.4768		85.4	10.7459		85.4	6.6196		85.4	5.5783		85.4	4.7111
	85.5	9.4895		85.5	10.7208		85.5	6.823		85.5	5.446		85.5	4.5993
	85.6	9.3488		85.6	10.73		85.6	6.902		85.6	5.5985		85.6	4.4176
	85.7	9.2369		85.7	11.0103		85.7	6.562		85.7	5.6293		85.7	4.3824
	85.8	9.3608		85.8	10.9401		85.8	6.4596		85.8	5.4256		85.8	4.3023
	85.9	9.3844		85.9	11.0453		85.9	6.49		85.9	5.4424		85.9	4.427
	86	9.1068		86	10.8764		86	6.5856		86	5.5548		86	4.3485
	86.1	9.2477		86.1	10.6873		86.1	6.6631		86.1	5.496		86.1	4.4362
	86.2	9.0183		86.2	10.6341		86.2	6.7645		86.2	5.3753		86.2	4.372
	86.3	8.6947		86.3	10.8897		86.3	6.5884		86.3	5.3913		86.3	4.3201
	86.4	8.845		86.4	10.8702		86.4	6.5098		86.4	5.6512		86.4	4.4612
	86.5	8.7596		86.5	11.2601		86.5	6.5946		86.5	5.5887		86.5	4.3911
	86.6	8.8264		86.6	11.2081		86.6	6.6821		86.6	5.4953		86.6	4.5106
	86.7	9.069		86.7	10.7449		86.7	6.453		86.7	5.5884		86.7	4.4559
	86.8	9.1688		86.8	10.7818		86.8	6.7208		86.8	5.635		86.8	4.3981
	86.9	8.9584		86.9	10.8878		86.9	6.7597		86.9	5.508		86.9	4.3517
	87	9.066		87	11.0062		87	6.4938		87	5.7679		87	4.3616
	87.1	9.0377		87.1	11.0988		87.1	6.5785		87.1	5.8607		87.1	4.2781
	87.2	9.1457		87.2	11.0378		87.2	6.5277		87.2	5.898		87.2	4.334
	87.3	8.9558		87.3	11.0759		87.3	6.6271		87.3	5.6726		87.3	4.4493
	87.4	8.9396		87.4	11.0549		87.4	6.423		87.4	5.6817		87.4	4.2988
	87.5	8.7813		87.5	11.2215		87.5	6.4858		87.5	5.7556		87.5	4.5422
	87.6	9.0688		87.6	11.3285		87.6	6.3187		87.6	5.823		87.6	4.426
	87.7	9.157		87.7	11.3696		87.7	6.233		87.7	5.5535		87.7	4.2813
	87.8	9.2847		87.8	11.4964		87.8	6.0724		87.8	5.4815		87.8	4.2328
	87.9	9.4199		87.9	11.7627		87.9	6.0959		87.9	6.0194		87.9	4.3267
	88	9.1769		88	11.9806		88	5.8584		88	6.0947		88	4.425
	88.1	9.0287		88.1	12.0257		88.1	6.0884		88.1	6.106		88.1	4.4742
	88.2	9.0771		88.2	11.6469		88.2	5.8759		88.2	6.1094		88.2	4.4716
	88.3	9.1472		88.3	11.6423		88.3	5.6827		88.3	6.0989		88.3	4.5026
	88.4	9.247		88.4	11.6032		88.4	5.553		88.4	6.1639		88.4	4.3106
	88.5	9.1337		88.5	11.63		88.5	5.2483		88.5	6.2929		88.5	4.4782
	88.6	9.0973		88.6	12.0309		88.6	5.1811		88.6	6.4431		88.6	4.5857
	88.7	9.0601		88.7	12.0119		88.7	5.199		88.7	6.4022		88.7	4.5204
	88.8	9.0918		88.8	12.025		88.8	5.3076		88.8	6.3443		88.8	4.5163
	88.9	9.101		88.9	12.2897		88.9	5.162		88.9	6.1166		88.9	4.3393
	89	9.1627		89	12.315		89	5.0679		89	6.1529		89	4.5033
	89.1	8.8869		89.1	12.1646		89.1	4.868		89.1	6.1105		89.1	4.5783
	89.2	8.8673		89.2	12.1772		89.2	4.793		89.2	6.2257		89.2	4.4853
	89.3	8.9361		89.3	11.8819		89.3	4.702		89.3	6.2449		89.3	4.3517
	89.4	9.0378		89.4	11.7158		89.4	4.6808		89.4	6.1662		89.4	4.3622
	89.5	8.8612		89.5	11.6452		89.5	4.7472		89.5	6.3299		89.5	4.198
	89.6	8.8446		89.6	12.0082		89.6	4.9268		89.6	6.3042		89.6	4.4369
	89.7	9.1155		89.7	11.8316		89.7	4.7747		89.7	6.5052		89.7	4.6189
	89.8	9.365		89.8	11.8634		89.8	4.7849		89.8	6.5561		89.8	4.487
	89.9	9.5541		89.9	11.7936		89.9	4.9607		89.9	6.4833		89.9	4.5698
	90	9.4485		90	11.6473		90	5.2487		90	6.3354		90	4.6369
	90.1	9.7832		90.1	12.0072		90.1	5.2338		90.1	6.3617		90.1	4.5365
	90.2	9.7668		90.2	11.9955		90.2	5.2143		90.2	6.3111		90.2	4.4746
	90.3	9.7515		90.3	11.8875		90.3	5.1088		90.3	6.4604		90.3	4.3741
	90.4	9.7474		90.4	11.6623		90.4	5.3242		90.4	6.5353		90.4	4.6591
	90.5	9.581		90.5	11.5612		90.5	5.0206		90.5	6.4301		90.5	4.8332
	90.6	9.7784		90.6	11.2899		90.6	4.9884		90.6	6.1881		90.6	4.7343
	90.7	9.768		90.7	11.3187		90.7	5.0459		90.7	6.3138		90.7	4.8517
	90.8	9.6429		90.8	11.4225		90.8	4.8277		90.8	6.5191		90.8	5.0504
	90.9	9.5984		90.9	11.5464		90.9	4.6698		90.9	6.5315		90.9	5.0751
	91	9.5867		91	11.4741		91	4.6203		91	6.5429		91	5.2231
	91.1	9.5423		91.1	11.6174		91.1	4.8358		91.1	6.3001		91.1	5.1517
	91.2	9.3697		91.2	11.6062		91.2	4.6596		91.2	6.1674		91.2	5.2765
	91.3	9.4834		91.3	11.9544		91.3	4.8347		91.3	6.0871		91.3	5.16
	91.4	9.5005		91.4	12.2913		91.4	4.9738		91.4	6.1452		91.4	5.1919
	91.5	9.4459		91.5	12.6291		91.5	4.9565		91.5	5.8912		91.5	4.8131
	91.6	9.7606		91.6	12.5542		91.6	5.1021		91.6	5.9141		91.6	4.9476
	91.7	9.8755		91.7	12.4784		91.7	5.1481		91.7	5.7827		91.7	4.9478
	91.8	10.0106		91.8	12.3866		91.8	5.3876		91.8	5.9004		91.8	4.9092
	91.9	9.8206		91.9	12.1525		91.9	5.3607		91.9	5.9714		91.9	5.2511
	92	9.7836		92	12.2337		92	5.2188		92	5.8823		92	4.9364
	92.1	9.6982		92.1	12.2824		92.1	5.1884		92.1	5.839		92.1	4.8018
	92.2	9.6006		92.2	12.0611		92.2	5.1463		92.2	5.8782		92.2	4.6121
	92.3	9.6832		92.3	11.9514		92.3	5.1974		92.3	6.1189		92.3	4.5996
	92.4	9.9745		92.4	11.7881		92.4	5.392		92.4	6.1003		92.4	4.5344
	92.5	9.9132		92.5	11.6523		92.5	5.2439		92.5	6.2078		92.5	4.6601
	92.6	10.1603		92.6	11.5668		92.6	5.1086		92.6	6.0067		92.6	4.3548
	92.7	10.1473		92.7	11.5045		92.7	5.2161		92.7	6.0139		92.7	4.5246
	92.8	10.0467		92.8	11.5701		92.8	5.2792		92.8	6.0832		92.8	4.3894
	92.9	10.1578		92.9	11.548		92.9	5.0837		92.9	6.0999		92.9	4.667
	93	10.1173		93	11.3487		93	5.1602		93	6.0253		93	4.7215
	93.1	9.912		93.1	11.2291		93.1	5.1721		93.1	5.9138		93.1	4.6813
	93.2	10.076		93.2	11.4785		93.2	5.1456		93.2	5.8387		93.2	4.9282
	93.3	10.2363		93.3	10.9998		93.3	5.0006		93.3	5.8222		93.3	4.8968
	93.4	10.1406		93.4	11.0242		93.4	4.9375		93.4	5.723		93.4	4.8735
	93.5	10.0833		93.5	11.1971		93.5	4.9387		93.5	5.5898		93.5	4.5717
	93.6	10.3596		93.6	11.3643		93.6	4.987		93.6	5.4296		93.6	4.6145
	93.7	10.5189		93.7	11.2053		93.7	4.7147		93.7	5.5219		93.7	4.7459
	93.8	10.6069		93.8	11.1442		93.8	4.53		93.8	5.513		93.8	4.7802
	93.9	10.7747		93.9	11.3333		93.9	4.5052		93.9	5.3076		93.9	5.0623
	94	10.9109		94	11.0781		94	4.601		94	5.2014		94	4.9349
	94.1	10.6142		94.1	11.132		94.1	4.5261		94.1	5.0838		94.1	5.105
	94.2	10.5516		94.2	11.5015		94.2	4.7028		94.2	5.1738		94.2	5.0677
	94.3	10.4117		94.3	11.3107		94.3	4.7035		94.3	5.3307		94.3	4.8826
	94.4	10.315		94.4	11.0204		94.4	4.493		94.4	5.2705		94.4	4.9045
	94.5	10.0845		94.5	10.7777		94.5	4.4963		94.5	5.2856		94.5	5.0724
	94.6	10.0074		94.6	10.9322		94.6	4.5846		94.6	5.4255		94.6	5.1633
	94.7	9.8451		94.7	10.8659		94.7	4.4969		94.7	5.3882		94.7	5.0806
	94.8	9.9877		94.8	10.6957		94.8	4.4629		94.8	5.6123		94.8	4.7868
	94.9	10.044		94.9	10.491		94.9	4.4771		94.9	5.6144		94.9	4.8782
	95	10.0338		95	10.4442		95	4.5536		95	5.7466		95	4.9088
	95.1	10.174		95.1	10.6168		95.1	4.4663		95.1	5.7534		95.1	4.9386
	95.2	9.9887		95.2	10.4524		95.2	4.6564		95.2	5.7613		95.2	4.8839
	95.3	10.0742		95.3	10.5204		95.3	4.7245		95.3	5.8471		95.3	4.9495
	95.4	9.8603		95.4	10.5684		95.4	4.5255		95.4	5.6804		95.4	5.2125
	95.5	10.2403		95.5	10.3444		95.5	4.6683		95.5	5.6852		95.5	5.5913
	95.6	10.5034		95.6	10.3911		95.6	4.5554		95.6	5.6691		95.6	5.555
	95.7	10.6906		95.7	10.2058		95.7	4.7111		95.7	5.5258		95.7	5.6382
	95.8	10.7576		95.8	10.231		95.8	4.6156		95.8	5.531		95.8	5.8166
	95.9	10.5869		95.9	10.1866		95.9	4.3309		95.9	5.5264		95.9	5.644
	96	10.9897		96	10.2729		96	4.3557		96	5.546		96	5.8253
	96.1	10.7731		96.1	10.4727		96.1	4.283		96.1	5.7245		96.1	5.8361
	96.2	10.8079		96.2	10.3753		96.2	4.4563		96.2	5.4744		96.2	5.7816
	96.3	10.9441		96.3	10.5155		96.3	4.4354		96.3	5.4229		96.3	5.9349
	96.4	10.957		96.4	10.4492		96.4	4.2572		96.4	5.6725		96.4	6.0518
	96.5	10.6794		96.5	10.5177		96.5	4.0279		96.5	5.6704		96.5	5.7927
	96.6	10.6567		96.6	10.3043		96.6	3.9458		96.6	5.595		96.6	5.861
	96.7	10.7868		96.7	10.3168		96.7	3.8834		96.7	5.804		96.7	6.1689
	96.8	10.8055		96.8	10.4341		96.8	4.0298		96.8	5.9194		96.8	6.0873
	96.9	10.8578		96.9	10.2152		96.9	3.9563		96.9	5.8524		96.9	6.0676
	97	11.0515		97	10.3149		97	3.894		97	5.6818		97	5.948
	97.1	10.8367		97.1	10.2715		97.1	3.8022		97.1	5.5181		97.1	6.0582
	97.2	10.6739		97.2	10.5562		97.2	3.8118		97.2	5.3811		97.2	6.0419
	97.3	10.4874		97.3	10.604		97.3	3.6825		97.3	5.3811		97.3	6.1317
	97.4	10.4529		97.4	10.7447		97.4	3.7367		97.4	5.3609		97.4	5.7593
	97.5	10.4183		97.5	11.0771		97.5	3.6745		97.5	5.6845		97.5	5.744
	97.6	10.5244		97.6	11.3216		97.6	3.7739		97.6	5.427		97.6	5.9161
	97.7	10.4132		97.7	11.2879		97.7	3.9331		97.7	5.3475		97.7	6.0268
	97.8	10.2958		97.8	11.2258		97.8	4.0268		97.8	5.292		97.8	5.9994
	97.9	10.4084		97.9	10.9253		97.9	3.88		97.9	5.2888		97.9	6.0599
	98	10.3365		98	10.8296		98	3.9335		98	5.3913		98	6.1594
	98.1	10.0551		98.1	11.0927		98.1	3.9746		98.1	5.1919		98.1	6.0201
	98.2	10.0294		98.2	11.0759		98.2	3.8066		98.2	5.231		98.2	6.018
	98.3	10.3762		98.3	11.4362		98.3	3.8406		98.3	5.3116		98.3	5.9622
	98.4	10.63		98.4	11.4523		98.4	3.834		98.4	5.3027		98.4	6.0206
	98.5	10.7031		98.5	11.4844		98.5	3.9752		98.5	5.2144		98.5	5.9536
	98.6	10.5512		98.6	11.8753		98.6	3.9614		98.6	5.2887		98.6	5.804
	98.7	10.5039		98.7	11.9995		98.7	4.0505		98.7	5.4457		98.7	5.8574
	98.8	10.8555		98.8	11.5909		98.8	4.1611		98.8	5.4728		98.8	5.8799
	98.9	10.8777		98.9	11.4634		98.9	4.1454		98.9	5.5527		98.9	5.9584
	99	11.261		99	11.035		99	4.1935		99	5.2676		99	5.979
	99.1	11.0589		99.1	10.9767		99.1	4.0307		99.1	5.3724		99.1	6.0604
	99.2	11.1271		99.2	11.2435		99.2	4.2287		99.2	5.1422		99.2	6.0461
	99.3	10.9477		99.3	11.2924		99.3	4.0765		99.3	5.1964		99.3	6.0941
	99.4	10.6253		99.4	11.1172		99.4	4.1583		99.4	5.2885		99.4	5.8801
	99.5	10.4742		99.5	11.2226		99.5	4.3692		99.5	5.1388		99.5	5.6634
	99.6	10.371		99.6	10.8611		99.6	4.4986		99.6	5.175		99.6	5.833
	99.7	10.4556		99.7	10.7627		99.7	4.5429		99.7	5.0497		99.7	5.7489
	99.8	10.4991		99.8	10.9064		99.8	4.5587		99.8	4.8961		99.8	5.9605
	99.9	10.4025		99.9	11.0108		99.9	4.5163		99.9	5.0722		99.9	6.0022
	100	10.3446		100	11.0122		100	4.4414		100	5.0597		100	6.0143

## Sheet: Figure 5F
Fig. 5F
Time evolution of the z-coordinate of the center of mass (Zcm) of the transmembrane helices of STX17TM in the case of membranes with PI
	#1			#2			#3			#4			#5
	time (nsec)	z_cm (nm)		time (nsec)	z_cm (nm)		time (nsec)	z_cm (nm)		time (nsec)	z_cm (nm)		time (nsec)	z_cm (nm)
	0.1	5.4901		0.1	4.996		0.1	5.4084		0.1	5.4273		0.1	5.4376
	0.2	5.4176		0.2	4.9689		0.2	5.3539		0.2	5.7054		0.2	5.4076
	0.3	5.7765		0.3	4.8832		0.3	4.8914		0.3	5.6532		0.3	5.4314
	0.4	5.8797		0.4	4.8323		0.4	5.0387		0.4	5.462		0.4	5.3528
	0.5	5.5809		0.5	4.7089		0.5	4.9941		0.5	5.6237		0.5	5.4492
	0.6	5.7487		0.6	4.8424		0.6	5.2368		0.6	5.8737		0.6	5.618
	0.7	5.9228		0.7	4.9749		0.7	5.378		0.7	5.9783		0.7	5.7537
	0.8	5.5202		0.8	4.622		0.8	5.2944		0.8	5.8651		0.8	6.0369
	0.9	5.3395		0.9	4.3919		0.9	5.6931		0.9	5.565		0.9	6.1059
	1	5.2081		1	4.4615		1	5.745		1	5.669		1	5.9377
	1.1	4.9264		1.1	4.395		1.1	5.5557		1.1	5.5723		1.1	5.7862
	1.2	4.928		1.2	4.3456		1.2	5.537		1.2	5.9931		1.2	5.9823
	1.3	4.5724		1.3	4.208		1.3	5.6236		1.3	5.7152		1.3	5.9356
	1.4	4.4129		1.4	4.0703		1.4	5.7834		1.4	6.0016		1.4	5.4764
	1.5	4.3035		1.5	4.0911		1.5	5.5685		1.5	5.7697		1.5	5.5522
	1.6	4.0022		1.6	4.1847		1.6	5.7972		1.6	5.4023		1.6	5.5033
	1.7	3.8422		1.7	4.1832		1.7	5.3847		1.7	5.6991		1.7	5.3952
	1.8	4.2128		1.8	3.9712		1.8	5.0539		1.8	5.7012		1.8	5.1265
	1.9	4.613		1.9	4.2392		1.9	5.0116		1.9	5.7308		1.9	5.0065
	2	4.2368		2	4.4829		2	5.2564		2	5.3621		2	4.6317
	2.1	4.191		2.1	4.4356		2.1	5.2005		2.1	5.8072		2.1	5.0407
	2.2	4.2848		2.2	4.8304		2.2	4.8898		2.2	6.2372		2.2	4.9586
	2.3	4.2664		2.3	4.8994		2.3	5.222		2.3	6.2836		2.3	4.8357
	2.4	4.2737		2.4	4.9638		2.4	5.4022		2.4	6.1019		2.4	5.0852
	2.5	4.4414		2.5	4.8655		2.5	5.1297		2.5	5.8575		2.5	4.7834
	2.6	4.3364		2.6	5.1861		2.6	4.7813		2.6	5.6529		2.6	4.7528
	2.7	4.0571		2.7	5.2658		2.7	4.9745		2.7	5.4067		2.7	4.7029
	2.8	4.1464		2.8	4.967		2.8	5.088		2.8	5.1929		2.8	5.1854
	2.9	4.3679		2.9	4.9335		2.9	5.2051		2.9	5.0624		2.9	5.3887
	3	4.1653		3	4.987		3	4.9945		3	4.8854		3	5.3363
	3.1	4.02		3.1	5.1757		3.1	5.1044		3.1	4.8113		3.1	5.5848
	3.2	4.0633		3.2	5.2076		3.2	5.2242		3.2	4.9823		3.2	5.7649
	3.3	3.8229		3.3	5.4939		3.3	4.9937		3.3	5.1923		3.3	5.5684
	3.4	3.8684		3.4	5.8235		3.4	4.831		3.4	5.2418		3.4	5.2759
	3.5	3.9437		3.5	5.9643		3.5	5.0079		3.5	5.5197		3.5	5.2087
	3.6	4.1056		3.6	6.1037		3.6	5.1582		3.6	5.8932		3.6	4.9165
	3.7	3.9921		3.7	6.2492		3.7	5.3499		3.7	5.9547		3.7	4.7378
	3.8	3.8237		3.8	5.8165		3.8	5.5465		3.8	5.6736		3.8	4.6325
	3.9	3.8735		3.9	5.7136		3.9	5.8699		3.9	5.4475		3.9	4.6078
	4	3.9837		4	5.4778		4	6.1529		4	5.6441		4	4.5652
	4.1	4.1602		4.1	5.6031		4.1	6.4693		4.1	5.8111		4.1	4.5144
	4.2	3.979		4.2	5.6298		4.2	6.2911		4.2	5.8746		4.2	4.536
	4.3	4.15		4.3	5.5237		4.3	6.2542		4.3	5.9742		4.3	4.528
	4.4	4.4486		4.4	5.8563		4.4	5.9841		4.4	5.7683		4.4	4.5088
	4.5	4.2693		4.5	6.1133		4.5	5.9733		4.5	5.9048		4.5	4.6415
	4.6	4.3068		4.6	6.2376		4.6	5.9793		4.6	6.1508		4.6	4.5206
	4.7	4.1232		4.7	6.3461		4.7	6.1462		4.7	5.883		4.7	4.4181
	4.8	4.1204		4.8	6.1495		4.8	6.0894		4.8	5.9057		4.8	4.1972
	4.9	4.516		4.9	6.4172		4.9	5.811		4.9	6.1204		4.9	3.9311
	5	4.3065		5	6.1549		5	5.7232		5	5.9953		5	4.1758
	5.1	4.3639		5.1	5.9329		5.1	5.7249		5.1	6.1924		5.1	4.2786
	5.2	4.2298		5.2	6.1088		5.2	5.6113		5.2	6.0407		5.2	3.9193
	5.3	4.054		5.3	6.5037		5.3	5.4236		5.3	5.9787		5.3	3.8346
	5.4	4.0896		5.4	6.1731		5.4	5.1507		5.4	6.5566		5.4	3.9661
	5.5	4.1664		5.5	6.3583		5.5	5.3613		5.5	6.561		5.5	4.0457
	5.6	4.2269		5.6	6.3066		5.6	5.4844		5.6	6.6604		5.6	4.0532
	5.7	4.5523		5.7	6.2514		5.7	5.4564		5.7	6.5572		5.7	3.8925
	5.8	4.708		5.8	6.4404		5.8	5.4291		5.8	6.6353		5.8	4.0384
	5.9	4.6192		5.9	6.432		5.9	5.0818		5.9	6.5394		5.9	3.7667
	6	4.2327		6	7.1645		6	4.97		6	6.3174		6	3.709
	6.1	4.4955		6.1	6.8508		6.1	5.2027		6.1	6.3615		6.1	3.5603
	6.2	4.5037		6.2	6.8961		6.2	5.1185		6.2	6.5719		6.2	3.4619
	6.3	4.7515		6.3	6.6287		6.3	4.5841		6.3	6.8014		6.3	3.6035
	6.4	4.6261		6.4	6.5361		6.4	4.5225		6.4	6.4844		6.4	3.6066
	6.5	4.6389		6.5	6.2828		6.5	4.2815		6.5	6.458		6.5	3.5485
	6.6	4.4437		6.6	6.6866		6.6	4.138		6.6	6.1327		6.6	3.2179
	6.7	5.0625		6.7	6.7451		6.7	4.1245		6.7	6.5181		6.7	3.4044
	6.8	4.7247		6.8	6.6206		6.8	4.1536		6.8	6.6382		6.8	3.3739
	6.9	4.5519		6.9	6.5372		6.9	4.0843		6.9	6.9266		6.9	3.3971
	7	4.8216		7	6.0857		7	4.0571		7	6.8582		7	3.6128
	7.1	4.8252		7.1	5.5214		7.1	3.7116		7.1	6.9514		7.1	3.3321
	7.2	4.8488		7.2	5.5015		7.2	3.9328		7.2	7.0284		7.2	3.4578
	7.3	4.7781		7.3	5.4191		7.3	3.8476		7.3	7.3197		7.3	3.4233
	7.4	4.7603		7.4	5.3026		7.4	4.0095		7.4	7.4712		7.4	3.6473
	7.5	5.0591		7.5	5.5582		7.5	4.2543		7.5	7.4779		7.5	3.7853
	7.6	5.0057		7.6	5.4565		7.6	4.1265		7.6	7.5673		7.6	3.7348
	7.7	5.172		7.7	5.445		7.7	3.952		7.7	7.4832		7.7	3.4906
	7.8	5.4306		7.8	5.1897		7.8	3.6847		7.8	7.5889		7.8	3.4756
	7.9	5.2621		7.9	5.0093		7.9	3.6928		7.9	7.3473		7.9	3.5719
	8	5.2231		8	5.5256		8	3.4941		8	7.5075		8	3.5723
	8.1	5.2532		8.1	6.0091		8.1	3.6228		8.1	7.464		8.1	3.3289
	8.2	5.365		8.2	6.0426		8.2	3.5495		8.2	7.6545		8.2	3.2088
	8.3	5.2332		8.3	6.1398		8.3	3.3759		8.3	7.6128		8.3	3.2215
	8.4	5.0165		8.4	5.9407		8.4	3.5474		8.4	7.5396		8.4	3.2692
	8.5	5.1745		8.5	5.2591		8.5	3.3089		8.5	7.4967		8.5	3.3556
	8.6	5.3587		8.6	5.5175		8.6	3.3423		8.6	7.188		8.6	3.5868
	8.7	5.4058		8.7	5.6132		8.7	3.3373		8.7	6.7231		8.7	3.6297
	8.8	5.1814		8.8	5.6808		8.8	3.5325		8.8	6.366		8.8	3.844
	8.9	5.2685		8.9	5.8086		8.9	3.661		8.9	6.3123		8.9	3.7671
	9	5.5621		9	5.7385		9	3.5949		9	6.1886		9	3.8974
	9.1	5.6068		9.1	5.6425		9.1	3.5471		9.1	5.7605		9.1	3.7555
	9.2	5.7222		9.2	5.2515		9.2	3.5156		9.2	6.0415		9.2	3.718
	9.3	5.542		9.3	5.3954		9.3	3.3518		9.3	6.146		9.3	3.8549
	9.4	5.4125		9.4	5.6273		9.4	3.31		9.4	5.7299		9.4	3.6499
	9.5	5.6569		9.5	5.5375		9.5	3.2165		9.5	5.8412		9.5	3.8638
	9.6	5.792		9.6	5.1646		9.6	3.4937		9.6	6.3246		9.6	4.0044
	9.7	5.8788		9.7	5.1492		9.7	3.2831		9.7	6.4806		9.7	4.0473
	9.8	5.8546		9.8	5.1086		9.8	3.1599		9.8	6.4034		9.8	4.0115
	9.9	6.2935		9.9	4.9225		9.9	3.1976		9.9	6.4488		9.9	4.0234
	10	6.6201		10	5.0619		10	3.5167		10	6.5216		10	3.8954
	10.1	6.4065		10.1	4.8987		10.1	3.4305		10.1	6.6794		10.1	3.8823
	10.2	6.4038		10.2	4.91		10.2	3.4251		10.2	7.118		10.2	4.0292
	10.3	6.8049		10.3	5.1834		10.3	3.5345		10.3	6.7705		10.3	3.9565
	10.4	6.9715		10.4	5.0541		10.4	3.5297		10.4	6.3122		10.4	3.9678
	10.5	6.9053		10.5	4.8589		10.5	3.4742		10.5	6.5102		10.5	4.0624
	10.6	6.883		10.6	4.7387		10.6	3.5238		10.6	6.8132		10.6	3.9824
	10.7	7.221		10.7	4.7808		10.7	3.3863		10.7	6.9333		10.7	4.1674
	10.8	7.334		10.8	4.9196		10.8	3.2073		10.8	7.1691		10.8	3.9739
	10.9	6.6329		10.9	4.9762		10.9	3.3019		10.9	7.0956		10.9	4.1543
	11	6.8528		11	5.0597		11	3.4018		11	7.23		11	3.7033
	11.1	6.547		11.1	4.8565		11.1	3.4859		11.1	7.3943		11.1	3.5587
	11.2	6.7097		11.2	4.6761		11.2	3.5875		11.2	7.393		11.2	3.4039
	11.3	6.8687		11.3	4.2769		11.3	3.809		11.3	7.1376		11.3	3.4853
	11.4	6.8717		11.4	4.3053		11.4	3.6243		11.4	6.8492		11.4	3.4679
	11.5	6.665		11.5	4.0865		11.5	3.5957		11.5	6.9533		11.5	3.2104
	11.6	6.785		11.6	4.081		11.6	3.5756		11.6	6.4551		11.6	3.2047
	11.7	6.3327		11.7	4.1314		11.7	3.3196		11.7	6.8901		11.7	3.3925
	11.8	6.4143		11.8	4.2389		11.8	3.3937		11.8	7.0014		11.8	3.3151
	11.9	6.6235		11.9	4.1224		11.9	3.3426		11.9	6.749		11.9	3.5013
	12	6.5606		12	4.2268		12	3.3079		12	6.9801		12	3.5677
	12.1	6.2839		12.1	4.154		12.1	3.583		12.1	6.8845		12.1	3.7107
	12.2	6.3483		12.2	4.1317		12.2	3.4482		12.2	6.684		12.2	3.7768
	12.3	6.3825		12.3	3.9054		12.3	3.7183		12.3	6.5617		12.3	3.6166
	12.4	6.4291		12.4	3.9304		12.4	3.4722		12.4	6.9776		12.4	3.5791
	12.5	6.513		12.5	4.0522		12.5	3.4872		12.5	6.7968		12.5	3.41
	12.6	6.5861		12.6	4.4251		12.6	3.5747		12.6	7.1391		12.6	3.3836
	12.7	6.9939		12.7	4.5386		12.7	3.4208		12.7	7.2183		12.7	3.5383
	12.8	7.1455		12.8	4.6089		12.8	3.3937		12.8	6.9831		12.8	3.5036
	12.9	7.4282		12.9	4.5522		12.9	3.455		12.9	7.3061		12.9	3.5979
	13	7.4441		13	4.3479		13	3.4373		13	7.3976		13	3.7336
	13.1	7.8576		13.1	4.7161		13.1	3.2871		13.1	7.4294		13.1	3.7276
	13.2	7.9913		13.2	4.5145		13.2	3.3966		13.2	7.2506		13.2	3.6407
	13.3	7.7994		13.3	4.5245		13.3	3.1767		13.3	7.0295		13.3	3.6748
	13.4	8.1414		13.4	4.5266		13.4	3.1742		13.4	6.8494		13.4	3.8689
	13.5	7.7303		13.5	4.4401		13.5	3.3308		13.5	7.242		13.5	3.6895
	13.6	7.6109		13.6	4.5784		13.6	3.2839		13.6	7.0018		13.6	3.7802
	13.7	7.9061		13.7	4.3606		13.7	3.3021		13.7	6.9215		13.7	3.8861
	13.8	7.9175		13.8	4.4004		13.8	3.322		13.8	6.7874		13.8	3.8073
	13.9	7.7212		13.9	4.3829		13.9	3.1112		13.9	6.8166		13.9	4.1426
	14	7.7486		14	4.3773		14	3.2308		14	6.9371		14	3.9423
	14.1	7.4506		14.1	4.6462		14.1	3.1742		14.1	6.941		14.1	3.8093
	14.2	7.1281		14.2	4.5665		14.2	3.0941		14.2	7.1435		14.2	3.5959
	14.3	7.1986		14.3	4.7038		14.3	3.2359		14.3	6.982		14.3	3.4807
	14.4	7.472		14.4	4.4559		14.4	3.2475		14.4	6.7472		14.4	3.4346
	14.5	7.5111		14.5	4.4224		14.5	3.3293		14.5	6.7429		14.5	3.3744
	14.6	7.5207		14.6	4.3183		14.6	3.3696		14.6	6.9494		14.6	3.1536
	14.7	7.3927		14.7	4.494		14.7	3.3707		14.7	6.6524		14.7	3.1425
	14.8	7.3131		14.8	4.2161		14.8	3.434		14.8	6.7724		14.8	3.1262
	14.9	7.0186		14.9	4.4426		14.9	3.3747		14.9	6.8017		14.9	3.1097
	15	7.0422		15	4.2274		15	3.3494		15	6.7883		15	3.2133
	15.1	6.6086		15.1	4.1528		15.1	3.3779		15.1	6.7151		15.1	3.322
	15.2	6.7766		15.2	4.3629		15.2	3.3848		15.2	6.6248		15.2	3.3352
	15.3	6.7071		15.3	4.2705		15.3	3.4356		15.3	6.7226		15.3	3.4045
	15.4	6.7859		15.4	4.1677		15.4	3.4246		15.4	6.7847		15.4	3.2961
	15.5	6.8697		15.5	4.0906		15.5	3.3311		15.5	6.9994		15.5	3.326
	15.6	6.8973		15.6	4.1329		15.6	3.3771		15.6	6.7951		15.6	3.2563
	15.7	7.3819		15.7	4.1746		15.7	3.2227		15.7	6.3843		15.7	3.228
	15.8	7.0449		15.8	4.1314		15.8	3.1623		15.8	6.1422		15.8	3.4151
	15.9	7.0925		15.9	4.188		15.9	3.1161		15.9	6.049		15.9	3.3697
	16	6.9424		16	4.4167		16	3.2132		16	6.4036		16	3.3379
	16.1	6.8516		16.1	4.6366		16.1	3.0679		16.1	6.177		16.1	3.2392
	16.2	7.1156		16.2	4.4501		16.2	3.1057		16.2	5.9315		16.2	3.4355
	16.3	7.0293		16.3	4.3385		16.3	3.2065		16.3	6.0852		16.3	3.3226
	16.4	7.1938		16.4	4.3338		16.4	3.1069		16.4	6.138		16.4	3.2532
	16.5	7.3451		16.5	4.3985		16.5	3.0852		16.5	5.9664		16.5	3.2334
	16.6	6.9746		16.6	4.0465		16.6	3.0849		16.6	6.0886		16.6	3.4627
	16.7	6.4854		16.7	4.1104		16.7	3.1218		16.7	5.9903		16.7	3.3689
	16.8	6.3275		16.8	4.2235		16.8	3.142		16.8	6.4032		16.8	3.3951
	16.9	6.652		16.9	4.0877		16.9	3.2176		16.9	6.7305		16.9	3.2221
	17	6.688		17	3.9656		17	3.2072		17	6.3746		17	3.0091
	17.1	6.9521		17.1	3.9307		17.1	3.255		17.1	6.3952		17.1	3.1042
	17.2	6.887		17.2	4.1093		17.2	3.3346		17.2	6.5406		17.2	3.2324
	17.3	6.9139		17.3	3.9899		17.3	3.4622		17.3	7.053		17.3	3.3648
	17.4	7.1851		17.4	4.1471		17.4	3.3826		17.4	7.2346		17.4	3.3669
	17.5	7.5244		17.5	4.1764		17.5	3.3065		17.5	7.2588		17.5	3.3196
	17.6	7.4464		17.6	4.0575		17.6	3.204		17.6	7.1657		17.6	3.4079
	17.7	7.4712		17.7	4.1364		17.7	3.3061		17.7	7.321		17.7	3.4171
	17.8	7.9021		17.8	4.0629		17.8	3.0618		17.8	7.5951		17.8	3.4754
	17.9	8.0232		17.9	4.1212		17.9	3.0481		17.9	7.6703		17.9	3.4703
	18	7.9126		18	4.1775		18	3.1027		18	7.7437		18	3.4032
	18.1	7.9856		18.1	4.0454		18.1	3.2858		18.1	7.44		18.1	3.5364
	18.2	7.9919		18.2	4.0204		18.2	3.3334		18.2	7.4173		18.2	3.5278
	18.3	8.1467		18.3	4.3746		18.3	3.2373		18.3	7.4594		18.3	3.4415
	18.4	8.0009		18.4	4.2988		18.4	3.3177		18.4	7.4514		18.4	3.2858
	18.5	7.6857		18.5	4.0165		18.5	3.2005		18.5	7.3669		18.5	3.3417
	18.6	7.4422		18.6	3.8249		18.6	3.3267		18.6	7.4203		18.6	3.4288
	18.7	7.3143		18.7	3.9462		18.7	3.2259		18.7	7.691		18.7	3.6054
	18.8	7.3484		18.8	3.9294		18.8	3.1106		18.8	8.0148		18.8	3.7136
	18.9	7.42		18.9	3.9475		18.9	3.2502		18.9	8.2721		18.9	3.6572
	19	7.2067		19	4.0665		19	3.2219		19	8.1292		19	3.6818
	19.1	7.0139		19.1	4.2474		19.1	3.2722		19.1	7.9847		19.1	3.5893
	19.2	6.9839		19.2	4.1837		19.2	3.1224		19.2	8.0997		19.2	3.698
	19.3	6.8044		19.3	4.1627		19.3	3.0842		19.3	8.0427		19.3	3.5616
	19.4	6.9878		19.4	4.2548		19.4	3.0439		19.4	8.0337		19.4	3.9145
	19.5	6.9965		19.5	4.0622		19.5	3.058		19.5	8.3567		19.5	4.1426
	19.6	6.8015		19.6	4.196		19.6	3.1021		19.6	7.9592		19.6	3.9708
	19.7	7.2363		19.7	4.0121		19.7	3.1253		19.7	7.5294		19.7	4.0609
	19.8	7.0054		19.8	3.9996		19.8	2.9946		19.8	7.3759		19.8	3.9658
	19.9	6.7941		19.9	4.2266		19.9	3.2022		19.9	7.496		19.9	3.7298
	20	6.5602		20	4.2026		20	3.0716		20	7.7735		20	3.8367
	20.1	6.5504		20.1	4.1584		20.1	3.0818		20.1	7.7148		20.1	3.8098
	20.2	6.4775		20.2	3.8887		20.2	3.0669		20.2	7.5937		20.2	4.245
	20.3	6.4834		20.3	4.1273		20.3	3.1184		20.3	7.2417		20.3	4.0885
	20.4	6.4797		20.4	4.0353		20.4	3.2387		20.4	7		20.4	3.8673
	20.5	6.3009		20.5	4.0956		20.5	3.197		20.5	6.6466		20.5	4.04
	20.6	5.7491		20.6	4.2503		20.6	3.1129		20.6	6.6964		20.6	3.8159
	20.7	6.0977		20.7	4.5725		20.7	3.0128		20.7	7.0149		20.7	4.0028
	20.8	6.0263		20.8	4.3998		20.8	2.9712		20.8	7.231		20.8	4.0556
	20.9	5.9442		20.9	4.618		20.9	3.1017		20.9	7.6525		20.9	3.8565
	21	6.0134		21	4.5552		21	3.0203		21	7.901		21	3.8582
	21.1	6.1363		21.1	4.5643		21.1	3.1512		21.1	7.8757		21.1	3.862
	21.2	6.0526		21.2	4.1956		21.2	3.0842		21.2	8.3885		21.2	3.6415
	21.3	6.1935		21.3	4.162		21.3	3.2342		21.3	8.3603		21.3	3.694
	21.4	6.1969		21.4	4.1494		21.4	3.086		21.4	7.9932		21.4	3.7896
	21.5	6.2852		21.5	4.2531		21.5	3.104		21.5	7.9619		21.5	3.7766
	21.6	6.0079		21.6	4.5788		21.6	3.054		21.6	7.9862		21.6	3.8464
	21.7	5.9627		21.7	4.8749		21.7	3.0562		21.7	7.6992		21.7	3.774
	21.8	5.8846		21.8	5.0672		21.8	3.1682		21.8	7.4114		21.8	4.027
	21.9	5.7607		21.9	5.0481		21.9	3.1214		21.9	7.0083		21.9	4.1047
	22	5.5609		22	5.1666		22	3.1668		22	7.6631		22	4.1759
	22.1	5.7287		22.1	5.05		22.1	3.1275		22.1	7.6878		22.1	3.9443
	22.2	5.8207		22.2	5.2409		22.2	3.0837		22.2	7.4911		22.2	4.0739
	22.3	5.651		22.3	5.0508		22.3	3.1762		22.3	7.8555		22.3	3.9135
	22.4	5.7463		22.4	5.224		22.4	3.1275		22.4	7.7489		22.4	3.7787
	22.5	5.5459		22.5	5.172		22.5	3.1243		22.5	7.8628		22.5	3.7525
	22.6	5.4565		22.6	5.1223		22.6	3.0894		22.6	8.4562		22.6	3.7018
	22.7	5.7192		22.7	4.9526		22.7	3.0817		22.7	8.4189		22.7	3.5935
	22.8	5.5584		22.8	4.7706		22.8	3.1333		22.8	8.5498		22.8	3.8237
	22.9	5.2158		22.9	4.9059		22.9	3.1905		22.9	8.1773		22.9	3.8207
	23	5.3829		23	5.3005		23	3.0612		23	8.3338		23	3.7167
	23.1	5.387		23.1	6.0872		23.1	3.1215		23.1	8.8767		23.1	3.6043
	23.2	5.1461		23.2	6.4574		23.2	3.1108		23.2	8.8395		23.2	3.5678
	23.3	5.2859		23.3	7.0009		23.3	3.0516		23.3	8.6807		23.3	3.6439
	23.4	5.2109		23.4	7.1739		23.4	3.2349		23.4	8.599		23.4	3.5952
	23.5	5.2365		23.5	7.1664		23.5	3.174		23.5	8.4393		23.5	3.4103
	23.6	5.2664		23.6	7.1194		23.6	3.0997		23.6	8.4124		23.6	3.4518
	23.7	5.027		23.7	7.0602		23.7	3.1573		23.7	8.3122		23.7	3.4554
	23.8	5.1124		23.8	7.0603		23.8	3.2131		23.8	8.6915		23.8	3.5613
	23.9	4.9986		23.9	7.3614		23.9	3.1044		23.9	8.2661		23.9	3.5843
	24	4.9881		24	7.734		24	3.1179		24	8.4072		24	3.38
	24.1	4.6896		24.1	7.9722		24.1	3.1853		24.1	8.4666		24.1	3.2946
	24.2	4.2622		24.2	7.7367		24.2	3.1946		24.2	8.3412		24.2	3.3177
	24.3	4.0998		24.3	7.8094		24.3	3.1792		24.3	8.0152		24.3	3.3024
	24.4	4.4457		24.4	7.6557		24.4	3.3571		24.4	8.3624		24.4	3.4122
	24.5	4.2348		24.5	7.7072		24.5	3.224		24.5	8.5765		24.5	3.3083
	24.6	4.0765		24.6	7.6454		24.6	3.2046		24.6	8.6732		24.6	3.3551
	24.7	4.2878		24.7	7.8618		24.7	3.1861		24.7	8.8629		24.7	3.2713
	24.8	4.2119		24.8	8.0111		24.8	3.2907		24.8	8.9436		24.8	3.4201
	24.9	4.4543		24.9	8.2215		24.9	3.2645		24.9	8.7404		24.9	3.4621
	25	4.2523		25	7.7954		25	3.2688		25	8.8621		25	3.4576
	25.1	4.5361		25.1	7.5562		25.1	3.2756		25.1	8.4076		25.1	3.2698
	25.2	4.6825		25.2	7.2883		25.2	3.4036		25.2	8.3277		25.2	3.1549
	25.3	4.7135		25.3	7.3899		25.3	3.5822		25.3	8.7855		25.3	3.0819
	25.4	4.6891		25.4	7.479		25.4	3.4394		25.4	8.8878		25.4	3.1799
	25.5	4.9023		25.5	7.4106		25.5	3.7511		25.5	8.3453		25.5	3.1462
	25.6	4.8616		25.6	7.7445		25.6	3.7806		25.6	8.5138		25.6	3.2089
	25.7	4.5052		25.7	7.6328		25.7	3.9481		25.7	8.5252		25.7	3.4883
	25.8	4.5397		25.8	7.4044		25.8	3.7153		25.8	8.5427		25.8	3.5152
	25.9	4.4508		25.9	7.601		25.9	3.5928		25.9	8.575		25.9	3.4034
	26	4.6411		26	7.1871		26	3.5048		26	8.6339		26	3.2677
	26.1	4.5467		26.1	7.7726		26.1	3.1833		26.1	8.9256		26.1	3.2155
	26.2	4.5565		26.2	7.3577		26.2	3.1206		26.2	9.1256		26.2	3.2286
	26.3	5.0701		26.3	7.4228		26.3	3.2118		26.3	9.1642		26.3	3.1876
	26.4	5.0121		26.4	7.4948		26.4	3.2284		26.4	9.3699		26.4	3.2115
	26.5	5.089		26.5	7.6588		26.5	3.231		26.5	9.4905		26.5	3.1691
	26.6	5.1233		26.6	8.0611		26.6	3.2041		26.6	9.2516		26.6	3.1242
	26.7	5.1649		26.7	8.1604		26.7	3.2245		26.7	9.2092		26.7	3.283
	26.8	5.2087		26.8	8.4022		26.8	3.1183		26.8	8.7342		26.8	3.3391
	26.9	5.2801		26.9	7.7975		26.9	3.1639		26.9	8.4871		26.9	3.24
	27	5.1437		27	7.749		27	3.1048		27	8.2329		27	3.1918
	27.1	5.1152		27.1	8.1879		27.1	3.1226		27.1	8.0944		27.1	3.2286
	27.2	5.4931		27.2	8.443		27.2	3.0933		27.2	8.3295		27.2	3.0998
	27.3	5.2267		27.3	8.5067		27.3	3.0975		27.3	8.2409		27.3	3.0575
	27.4	5.4655		27.4	8.6656		27.4	2.9458		27.4	8.5158		27.4	3.3471
	27.5	5.1853		27.5	8.8452		27.5	3.1081		27.5	8.3791		27.5	3.6038
	27.6	5.2134		27.6	8.698		27.6	3.1551		27.6	8.5731		27.6	3.603
	27.7	4.969		27.7	8.4528		27.7	3.2126		27.7	8.1916		27.7	3.5158
	27.8	4.828		27.8	8.4837		27.8	3.3029		27.8	8.4745		27.8	3.6556
	27.9	4.7016		27.9	8.4063		27.9	3.2952		27.9	8.3597		27.9	3.6347
	28	4.9621		28	8.5229		28	3.4853		28	8.226		28	3.708
	28.1	4.8477		28.1	8.6357		28.1	3.3122		28.1	8.1638		28.1	3.6323
	28.2	4.568		28.2	8.6399		28.2	3.3909		28.2	8.3195		28.2	3.5713
	28.3	4.3656		28.3	8.8449		28.3	3.3932		28.3	8.1424		28.3	3.66
	28.4	4.201		28.4	8.4325		28.4	3.3521		28.4	8.0178		28.4	3.4106
	28.5	4.4042		28.5	8.4759		28.5	3.4147		28.5	8.1398		28.5	3.5
	28.6	4.5843		28.6	9.0286		28.6	3.3865		28.6	8.0348		28.6	3.5303
	28.7	4.7086		28.7	9.4135		28.7	3.3772		28.7	7.822		28.7	3.5075
	28.8	4.7872		28.8	9.4911		28.8	3.3097		28.8	7.9749		28.8	3.5597
	28.9	4.8884		28.9	8.9454		28.9	3.3222		28.9	7.7347		28.9	3.6382
	29	4.6385		29	8.818		29	3.2123		29	7.5642		29	3.8361
	29.1	4.3595		29.1	8.6554		29.1	3.248		29.1	7.5659		29.1	3.6545
	29.2	4.2792		29.2	8.5541		29.2	3.2983		29.2	7.3871		29.2	3.3943
	29.3	4.1512		29.3	8.2834		29.3	3.169		29.3	7.2398		29.3	3.4626
	29.4	4.1755		29.4	8.0303		29.4	3.0707		29.4	7.7035		29.4	3.5551
	29.5	4.2912		29.5	8.1183		29.5	3.2413		29.5	8.0186		29.5	3.599
	29.6	4.3169		29.6	8.2269		29.6	3.2333		29.6	7.7108		29.6	3.4562
	29.7	4.6449		29.7	8.3229		29.7	3.1544		29.7	7.8397		29.7	3.6247
	29.8	4.5506		29.8	8.2224		29.8	3.1262		29.8	7.4379		29.8	3.5835
	29.9	4.707		29.9	8.8419		29.9	3.2187		29.9	7.2497		29.9	3.4937
	30	4.9674		30	8.1052		30	3.246		30	7.3956		30	3.7177
	30.1	5.0373		30.1	8.1535		30.1	3.2452		30.1	7.5906		30.1	3.7133
	30.2	4.8605		30.2	8.3671		30.2	3.562		30.2	7.4889		30.2	3.7006
	30.3	4.9369		30.3	8.1128		30.3	3.4463		30.3	7.3481		30.3	3.5356
	30.4	5.1566		30.4	7.6589		30.4	3.5254		30.4	7.0976		30.4	3.4779
	30.5	5.119		30.5	7.5718		30.5	3.4631		30.5	7.1189		30.5	3.2874
	30.6	4.8486		30.6	7.6995		30.6	3.4481		30.6	6.4602		30.6	3.4241
	30.7	4.841		30.7	7.2643		30.7	3.5023		30.7	6.0449		30.7	3.3402
	30.8	4.7466		30.8	6.8006		30.8	3.5592		30.8	5.9773		30.8	3.4849
	30.9	4.7807		30.9	6.6852		30.9	3.5221		30.9	6.2322		30.9	3.5242
	31	4.5113		31	7.076		31	3.638		31	6.2598		31	3.4136
	31.1	4.5037		31.1	6.9659		31.1	3.5695		31.1	6.0449		31.1	3.3484
	31.2	4.2868		31.2	7.0199		31.2	3.5682		31.2	5.9124		31.2	3.27
	31.3	4.2236		31.3	7.0879		31.3	3.4398		31.3	5.8972		31.3	3.4317
	31.4	3.8855		31.4	7.2315		31.4	3.4732		31.4	5.63		31.4	3.5475
	31.5	4.2836		31.5	6.5849		31.5	3.3437		31.5	5.6318		31.5	3.6901
	31.6	4.0777		31.6	6.5466		31.6	3.4597		31.6	5.5713		31.6	3.507
	31.7	4.2203		31.7	6.6244		31.7	3.6087		31.7	5.3593		31.7	3.4646
	31.8	4.2362		31.8	6.5396		31.8	3.5874		31.8	5.3596		31.8	3.3512
	31.9	4.3057		31.9	6.1877		31.9	3.6004		31.9	5.4047		31.9	3.3582
	32	4.372		32	6.252		32	3.5636		32	5.5376		32	3.1247
	32.1	4.396		32.1	6.4051		32.1	3.4515		32.1	5.502		32.1	3.1566
	32.2	4.283		32.2	6.5276		32.2	3.5888		32.2	5.873		32.2	3.1813
	32.3	4.2551		32.3	6.5109		32.3	3.6489		32.3	6.074		32.3	3.0827
	32.4	4.4088		32.4	6.1465		32.4	3.6992		32.4	6.0383		32.4	3.1366
	32.5	4.484		32.5	5.8709		32.5	4.0031		32.5	5.918		32.5	3.0438
	32.6	4.6101		32.6	5.8597		32.6	3.9745		32.6	5.8601		32.6	3.1374
	32.7	4.657		32.7	5.6026		32.7	4.2396		32.7	5.5307		32.7	3.3495
	32.8	5.0579		32.8	5.6953		32.8	4.2388		32.8	5.1904		32.8	3.3341
	32.9	5.2641		32.9	5.5593		32.9	3.9897		32.9	5.4285		32.9	3.2949
	33	5.1672		33	5.6728		33	4.0622		33	5.1545		33	3.4333
	33.1	5.3738		33.1	6.1352		33.1	4.0718		33.1	5.2286		33.1	3.4272
	33.2	4.9982		33.2	6.2775		33.2	4.0034		33.2	5.0251		33.2	3.489
	33.3	5.2423		33.3	6.4331		33.3	4.4608		33.3	4.8602		33.3	3.5695
	33.4	5.0885		33.4	6.2197		33.4	4.1898		33.4	4.6112		33.4	3.7013
	33.5	4.9275		33.5	6.3258		33.5	4.637		33.5	4.7144		33.5	3.6264
	33.6	4.7711		33.6	6.482		33.6	4.6399		33.6	4.6671		33.6	3.5525
	33.7	5.1269		33.7	6.6537		33.7	4.5694		33.7	4.6112		33.7	3.6953
	33.8	5.0185		33.8	6.6055		33.8	4.4411		33.8	4.4002		33.8	3.5736
	33.9	5.4494		33.9	6.5932		33.9	4.0643		33.9	4.524		33.9	3.5473
	34	5.5518		34	6.5904		34	4.5516		34	4.562		34	3.5878
	34.1	5.2922		34.1	6.4513		34.1	4.5932		34.1	4.6008		34.1	3.5117
	34.2	5.3173		34.2	6.1923		34.2	4.3815		34.2	4.6664		34.2	3.7157
	34.3	5.4588		34.3	6.514		34.3	4.2135		34.3	4.5809		34.3	3.5438
	34.4	5.7901		34.4	6.4979		34.4	4.4375		34.4	4.675		34.4	3.4319
	34.5	5.8406		34.5	6.5376		34.5	4.5013		34.5	4.4044		34.5	3.595
	34.6	5.9016		34.6	6.6457		34.6	4.3865		34.6	4.5729		34.6	3.3495
	34.7	6.2542		34.7	6.7495		34.7	4.4322		34.7	4.2841		34.7	3.423
	34.8	6.3188		34.8	6.6717		34.8	4.2484		34.8	4.5884		34.8	3.3595
	34.9	6.2683		34.9	6.5335		34.9	4.2306		34.9	4.5852		34.9	3.446
	35	6.4295		35	6.3896		35	4.3037		35	4.3983		35	3.3504
	35.1	6.4231		35.1	6.9057		35.1	4.4054		35.1	3.8696		35.1	3.4295
	35.2	6.4688		35.2	7.0481		35.2	4.4707		35.2	4.1885		35.2	3.3352
	35.3	6.3613		35.3	6.6058		35.3	4.4312		35.3	4.2502		35.3	3.3551
	35.4	6.803		35.4	6.421		35.4	4.5528		35.4	4.4792		35.4	3.3527
	35.5	6.5809		35.5	6.2383		35.5	4.7532		35.5	4.503		35.5	3.2808
	35.6	6.0608		35.6	6.1416		35.6	4.5398		35.6	4.7404		35.6	3.3077
	35.7	6.1044		35.7	6.0636		35.7	4.7187		35.7	5.1863		35.7	3.394
	35.8	6.0854		35.8	6.3503		35.8	4.709		35.8	4.976		35.8	3.4289
	35.9	6.0228		35.9	6.4828		35.9	4.6483		35.9	5.1944		35.9	3.5396
	36	6.0162		36	6.5966		36	4.6113		36	5.073		36	3.4664
	36.1	6.3181		36.1	6.7461		36.1	4.9583		36.1	4.9138		36.1	3.556
	36.2	6.2894		36.2	7.0477		36.2	5.1852		36.2	5.0287		36.2	3.5276
	36.3	6.0463		36.3	6.8516		36.3	5.6795		36.3	5.2173		36.3	3.485
	36.4	5.9121		36.4	6.7692		36.4	5.6699		36.4	5.377		36.4	3.6361
	36.5	6.211		36.5	6.9845		36.5	5.5254		36.5	5.506		36.5	3.516
	36.6	6.0853		36.6	6.5766		36.6	5.4544		36.6	5.271		36.6	3.5951
	36.7	5.7486		36.7	6.5612		36.7	5.7532		36.7	5.2578		36.7	3.6875
	36.8	5.5332		36.8	6.4259		36.8	5.7501		36.8	5.217		36.8	3.7041
	36.9	5.4218		36.9	6.3876		36.9	5.9887		36.9	4.9476		36.9	3.4646
	37	5.3705		37	6.7921		37	6.1519		37	4.7334		37	3.3292
	37.1	5.4487		37.1	6.7965		37.1	5.7776		37.1	4.8132		37.1	3.1737
	37.2	5.721		37.2	6.8616		37.2	5.8487		37.2	4.5705		37.2	3.2917
	37.3	5.701		37.3	6.6287		37.3	5.335		37.3	4.5746		37.3	3.3627
	37.4	5.647		37.4	6.6746		37.4	5.1879		37.4	4.5161		37.4	3.3337
	37.5	5.0459		37.5	6.7834		37.5	5.189		37.5	4.4604		37.5	3.4137
	37.6	5.5758		37.6	6.8827		37.6	5.3421		37.6	4.4933		37.6	3.6413
	37.7	5.6553		37.7	6.3893		37.7	5.5364		37.7	4.4766		37.7	3.7868
	37.8	5.6469		37.8	6.4743		37.8	5.6301		37.8	4.4474		37.8	3.9312
	37.9	5.4231		37.9	6.4412		37.9	5.8938		37.9	4.4694		37.9	3.9584
	38	5.302		38	6.0636		38	6.134		38	4.5639		38	3.8583
	38.1	5.325		38.1	6.0405		38.1	5.9835		38.1	4.4671		38.1	3.5947
	38.2	5.3924		38.2	6.2854		38.2	6.1804		38.2	4.1753		38.2	3.8382
	38.3	5.5669		38.3	6.4093		38.3	5.7357		38.3	3.6968		38.3	3.6807
	38.4	5.9063		38.4	6.6902		38.4	5.6329		38.4	3.7204		38.4	3.6089
	38.5	6.2557		38.5	6.2446		38.5	5.8987		38.5	3.8243		38.5	3.6692
	38.6	6.2493		38.6	6.1017		38.6	5.7549		38.6	3.8384		38.6	3.666
	38.7	5.75		38.7	6.0743		38.7	5.9028		38.7	3.9309		38.7	3.4348
	38.8	5.7121		38.8	6.0834		38.8	5.8852		38.8	4.0239		38.8	3.5913
	38.9	5.6215		38.9	6.4927		38.9	5.484		38.9	4.2948		38.9	3.4919
	39	5.869		39	6.1954		39	5.7545		39	4.1183		39	3.4843
	39.1	5.7805		39.1	6.1128		39.1	5.8076		39.1	4.024		39.1	3.4823
	39.2	5.9245		39.2	5.8087		39.2	6.028		39.2	4.0252		39.2	3.4564
	39.3	6.1503		39.3	5.7847		39.3	6.0925		39.3	4.0578		39.3	3.4181
	39.4	6.2948		39.4	5.5855		39.4	6.2738		39.4	3.8986		39.4	3.3996
	39.5	6.0829		39.5	5.4644		39.5	6.3926		39.5	4.0136		39.5	3.4055
	39.6	6.2464		39.6	5.4575		39.6	6.2837		39.6	4.1092		39.6	3.442
	39.7	6.2063		39.7	5.6051		39.7	6.3144		39.7	3.9622		39.7	3.3994
	39.8	6.1898		39.8	5.6019		39.8	6.4027		39.8	4.0871		39.8	3.5365
	39.9	6.3327		39.9	5.6482		39.9	6.5311		39.9	4.0923		39.9	3.568
	40	6.1235		40	5.6967		40	6.5974		40	4.0638		40	3.5966
	40.1	6.2825		40.1	5.156		40.1	6.5436		40.1	3.9334		40.1	3.7424
	40.2	6.038		40.2	5.1979		40.2	6.4862		40.2	4.193		40.2	3.6063
	40.3	6.2355		40.3	5.0348		40.3	6.2767		40.3	4.0036		40.3	3.653
	40.4	6.5666		40.4	5.0871		40.4	6.508		40.4	4.4451		40.4	3.7258
	40.5	6.4419		40.5	5.2562		40.5	6.4188		40.5	4.6025		40.5	3.7194
	40.6	6.5423		40.6	5.2942		40.6	6.3906		40.6	4.6284		40.6	3.8632
	40.7	6.6436		40.7	5.3237		40.7	6.0241		40.7	4.3739		40.7	3.6905
	40.8	7.0501		40.8	5.5295		40.8	6.3757		40.8	4.5897		40.8	3.7422
	40.9	7.0593		40.9	5.6088		40.9	6.4505		40.9	4.5289		40.9	3.5981
	41	6.8869		41	5.3412		41	6.1338		41	4.2087		41	3.7453
	41.1	6.8176		41.1	5.199		41.1	6.045		41.1	4.4637		41.1	3.7076
	41.2	6.9213		41.2	5.6128		41.2	6.0683		41.2	4.3204		41.2	3.7199
	41.3	6.7693		41.3	5.3254		41.3	5.9757		41.3	4.5229		41.3	3.7791
	41.4	6.5975		41.4	5.3892		41.4	6.1402		41.4	4.3448		41.4	3.9844
	41.5	6.7954		41.5	5.3067		41.5	6.0507		41.5	4.1585		41.5	3.7655
	41.6	6.617		41.6	5.4715		41.6	5.8511		41.6	4.4268		41.6	3.8382
	41.7	6.5553		41.7	5.1357		41.7	5.2422		41.7	4.2987		41.7	4.0692
	41.8	6.1153		41.8	5.4216		41.8	5.418		41.8	4.4064		41.8	4.015
	41.9	6.4328		41.9	5.4726		41.9	5.4658		41.9	4.3656		41.9	3.8616
	42	6.2577		42	5.238		42	5.2582		42	4.5191		42	3.8424
	42.1	6.2091		42.1	5.0351		42.1	4.9534		42.1	4.2858		42.1	3.9588
	42.2	6.4768		42.2	5.0287		42.2	4.7992		42.2	4.3405		42.2	4.0791
	42.3	6.1251		42.3	5.5528		42.3	4.9476		42.3	4.492		42.3	3.7212
	42.4	5.8713		42.4	5.2954		42.4	5.4362		42.4	4.504		42.4	3.7708
	42.5	5.7777		42.5	5.0708		42.5	5.4316		42.5	4.6449		42.5	3.9212
	42.6	6.1006		42.6	5.3893		42.6	5.6341		42.6	4.7142		42.6	3.8782
	42.7	6.0518		42.7	5.5467		42.7	5.5536		42.7	4.8342		42.7	3.9403
	42.8	6.178		42.8	5.7768		42.8	5.6416		42.8	4.9932		42.8	3.7944
	42.9	6.1272		42.9	6.1463		42.9	5.6593		42.9	5.1768		42.9	3.6809
	43	6.208		43	6.1664		43	5.6509		43	5.4452		43	3.9383
	43.1	5.9556		43.1	6.4534		43.1	5.8846		43.1	5.166		43.1	4.0847
	43.2	6.0854		43.2	5.8103		43.2	6.1516		43.2	5.3141		43.2	4.1444
	43.3	6.2972		43.3	5.8615		43.3	6.3616		43.3	5.2605		43.3	4.0476
	43.4	6.3997		43.4	6.0574		43.4	6.5829		43.4	5.4054		43.4	4.1271
	43.5	6.2126		43.5	5.9444		43.5	6.4937		43.5	5.1869		43.5	4.2507
	43.6	6.21		43.6	6.4618		43.6	6.5048		43.6	5.1928		43.6	4.0852
	43.7	6.4002		43.7	6.6661		43.7	6.1975		43.7	5.0618		43.7	3.8947
	43.8	6.5602		43.8	6.7662		43.8	6.0343		43.8	5.0767		43.8	3.7504
	43.9	6.2381		43.9	6.4874		43.9	6.1159		43.9	4.819		43.9	4.1614
	44	6.2833		44	6.7031		44	5.9321		44	4.9772		44	4.2001
	44.1	6.2613		44.1	6.58		44.1	6.1107		44.1	4.763		44.1	4.0411
	44.2	6.225		44.2	6.4522		44.2	6.3831		44.2	4.6374		44.2	4.2514
	44.3	6.1975		44.3	6.1714		44.3	6.3603		44.3	4.7429		44.3	4.2986
	44.4	5.761		44.4	6.0045		44.4	6.1439		44.4	4.9006		44.4	4.3097
	44.5	5.6537		44.5	6.0452		44.5	6.5081		44.5	4.6925		44.5	4.3877
	44.6	5.8586		44.6	6.0691		44.6	6.4584		44.6	4.5418		44.6	4.2526
	44.7	6.0339		44.7	5.6827		44.7	6.3738		44.7	4.4857		44.7	3.8959
	44.8	6.0647		44.8	5.794		44.8	6.3567		44.8	4.8444		44.8	3.8987
	44.9	6.1144		44.9	5.7385		44.9	6.4471		44.9	5.0346		44.9	4.2437
	45	5.9959		45	5.534		45	6.6437		45	5.1651		45	4.2794
	45.1	5.8812		45.1	5.287		45.1	6.4996		45.1	5.4691		45.1	4.34
	45.2	6.0309		45.2	5.1283		45.2	6.4715		45.2	5.1888		45.2	3.8559
	45.3	5.9926		45.3	5.2633		45.3	6.7205		45.3	5.0991		45.3	3.9665
	45.4	6.1055		45.4	5.118		45.4	6.6991		45.4	5.294		45.4	3.7874
	45.5	6.1876		45.5	5.3456		45.5	6.8281		45.5	5.0324		45.5	3.8216
	45.6	5.8233		45.6	5.3502		45.6	6.9809		45.6	4.8788		45.6	3.8344
	45.7	6.0578		45.7	5.6219		45.7	7.0038		45.7	4.7662		45.7	3.8855
	45.8	6.3074		45.8	5.7507		45.8	7.2061		45.8	4.8098		45.8	3.935
	45.9	6.0264		45.9	5.4861		45.9	6.7349		45.9	4.7899		45.9	3.5907
	46	5.6716		46	5.2695		46	6.3715		46	4.6567		46	3.5601
	46.1	5.6396		46.1	5.6812		46.1	6.1688		46.1	4.4112		46.1	3.5772
	46.2	5.5554		46.2	5.8279		46.2	5.7385		46.2	4.5037		46.2	3.6173
	46.3	5.4713		46.3	5.8676		46.3	5.47		46.3	4.6884		46.3	3.8585
	46.4	5.6784		46.4	6.2808		46.4	5.505		46.4	4.5288		46.4	3.8202
	46.5	5.9513		46.5	6.2066		46.5	5.4066		46.5	4.4334		46.5	3.8817
	46.6	5.9823		46.6	6.5292		46.6	5.6078		46.6	4.3385		46.6	3.6494
	46.7	6.0431		46.7	6.6948		46.7	6.025		46.7	4.1621		46.7	3.6745
	46.8	5.7249		46.8	6.5731		46.8	5.8125		46.8	4.2017		46.8	3.6926
	46.9	5.522		46.9	6.6349		46.9	6.0741		46.9	4.2305		46.9	3.4599
	47	5.4748		47	6.3971		47	6.3508		47	4.4238		47	3.6976
	47.1	4.9033		47.1	6.4321		47.1	6.5533		47.1	4.4499		47.1	3.7249
	47.2	4.4689		47.2	6.6408		47.2	6.5613		47.2	4.3377		47.2	3.7811
	47.3	4.2086		47.3	6.522		47.3	6.2761		47.3	4.2373		47.3	3.7524
	47.4	4.1612		47.4	6.6682		47.4	6.2653		47.4	4.2693		47.4	3.8143
	47.5	4.3763		47.5	6.5985		47.5	6.2986		47.5	4.4472		47.5	4.001
	47.6	4.3345		47.6	6.4888		47.6	5.8132		47.6	4.3895		47.6	4.0677
	47.7	4.9233		47.7	6.6506		47.7	5.4507		47.7	4.6265		47.7	4.0538
	47.8	4.8076		47.8	6.8453		47.8	5.4006		47.8	4.6807		47.8	3.7826
	47.9	4.6369		47.9	6.9553		47.9	5.8546		47.9	4.8202		47.9	3.7341
	48	4.5203		48	6.9098		48	5.5878		48	4.6824		48	3.8278
	48.1	4.2416		48.1	6.45		48.1	5.5525		48.1	4.5916		48.1	4.16
	48.2	4.2582		48.2	6.4675		48.2	5.6537		48.2	4.4138		48.2	4.0946
	48.3	4.3365		48.3	6.3187		48.3	5.5424		48.3	4.4062		48.3	4.1143
	48.4	4.2849		48.4	6.1804		48.4	5.9711		48.4	4.3081		48.4	4.1925
	48.5	4.4913		48.5	6.1306		48.5	6.1312		48.5	3.9287		48.5	3.9325
	48.6	4.7525		48.6	6.3235		48.6	5.8497		48.6	4.0419		48.6	3.8923
	48.7	4.6224		48.7	6.1119		48.7	5.4917		48.7	3.9497		48.7	3.9605
	48.8	4.5139		48.8	6.3884		48.8	5.3969		48.8	4.0079		48.8	4.0641
	48.9	4.3318		48.9	5.9688		48.9	5.7636		48.9	4.2497		48.9	3.9426
	49	4.2799		49	6.0331		49	5.7304		49	4.2736		49	3.8463
	49.1	4.2787		49.1	5.9454		49.1	5.7855		49.1	4.2721		49.1	3.7692
	49.2	4.334		49.2	5.76		49.2	5.6092		49.2	4.3431		49.2	3.3987
	49.3	4.5139		49.3	6.0843		49.3	5.5301		49.3	4.1956		49.3	3.536
	49.4	4.4271		49.4	5.9791		49.4	5.5819		49.4	4.0178		49.4	3.4963
	49.5	4.1065		49.5	6.161		49.5	5.7105		49.5	4.0585		49.5	3.3232
	49.6	3.9058		49.6	6.2074		49.6	5.5117		49.6	4.0346		49.6	3.3696
	49.7	3.938		49.7	5.9514		49.7	5.2695		49.7	4.0776		49.7	3.3343
	49.8	3.735		49.8	5.7638		49.8	5.2909		49.8	4.1734		49.8	3.5457
	49.9	3.7302		49.9	5.5362		49.9	5.3885		49.9	4.2029		49.9	3.3875
	50	3.8476		50	5.7935		50	5.2705		50	4.0671		50	3.3935
	50.1	3.9173		50.1	5.6946		50.1	5.2464		50.1	4.0973		50.1	3.4995
	50.2	3.9324		50.2	5.7876		50.2	4.9945		50.2	4.0747		50.2	3.6286
	50.3	3.9203		50.3	5.623		50.3	4.7965		50.3	3.9716		50.3	3.6339
	50.4	4.1173		50.4	5.3231		50.4	4.811		50.4	4.0712		50.4	3.4488
	50.5	4.8132		50.5	5.344		50.5	4.7485		50.5	4.1551		50.5	3.7194
	50.6	4.7802		50.6	5.3165		50.6	5.0089		50.6	4.0808		50.6	3.8989
	50.7	4.6422		50.7	5.4609		50.7	4.943		50.7	3.9845		50.7	3.7575
	50.8	4.8051		50.8	5.1383		50.8	4.983		50.8	3.9107		50.8	3.7511
	50.9	4.9979		50.9	5.3343		50.9	4.9952		50.9	3.9216		50.9	3.7032
	51	4.9707		51	4.995		51	5.0627		51	3.8864		51	3.7316
	51.1	5.2715		51.1	4.832		51.1	4.7977		51.1	3.8942		51.1	3.5788
	51.2	5.3871		51.2	4.3401		51.2	4.948		51.2	3.8939		51.2	3.3977
	51.3	5.4356		51.3	4.2591		51.3	5.002		51.3	3.9232		51.3	3.6202
	51.4	5.7331		51.4	3.8701		51.4	4.8174		51.4	4.0099		51.4	3.5139
	51.5	6.0412		51.5	3.9205		51.5	5.2449		51.5	4.1082		51.5	3.5701
	51.6	5.8417		51.6	4.0533		51.6	5.4577		51.6	3.9675		51.6	3.5956
	51.7	5.8084		51.7	3.9483		51.7	5.5162		51.7	4.0083		51.7	3.9783
	51.8	5.9747		51.8	4.0911		51.8	5.094		51.8	4.0686		51.8	3.943
	51.9	6.0964		51.9	3.8554		51.9	4.9789		51.9	4.044		51.9	4.1276
	52	5.7234		52	3.9136		52	5.1333		52	4.0937		52	4.0299
	52.1	6.0366		52.1	4.1388		52.1	5.0895		52.1	4.3851		52.1	4.0716
	52.2	5.8781		52.2	4.165		52.2	4.912		52.2	4.1423		52.2	3.9513
	52.3	5.6179		52.3	4.2746		52.3	5.1843		52.3	4.2406		52.3	3.8855
	52.4	5.581		52.4	4.0705		52.4	5.1419		52.4	4.1477		52.4	4.0022
	52.5	5.2977		52.5	4.0644		52.5	5.5287		52.5	4.2573		52.5	3.8871
	52.6	5.3079		52.6	4.1512		52.6	5.9793		52.6	3.9033		52.6	4.1378
	52.7	5.0774		52.7	4.0875		52.7	5.4088		52.7	4.1638		52.7	4.3297
	52.8	4.976		52.8	3.816		52.8	5.0586		52.8	3.9343		52.8	4.4549
	52.9	4.6745		52.9	4.0171		52.9	4.8154		52.9	3.9657		52.9	4.3815
	53	4.6427		53	3.9723		53	5.1052		53	3.9491		53	4.3551
	53.1	4.9773		53.1	3.8717		53.1	4.7889		53.1	4.0065		53.1	4.3745
	53.2	4.8908		53.2	3.8683		53.2	5.1803		53.2	3.8806		53.2	4.4152
	53.3	5.0051		53.3	3.9993		53.3	5.4522		53.3	4.03		53.3	4.4558
	53.4	5.1544		53.4	3.9196		53.4	5.1736		53.4	4.3105		53.4	4.4998
	53.5	4.6426		53.5	3.8969		53.5	4.9282		53.5	4.4281		53.5	4.5464
	53.6	4.3001		53.6	3.8524		53.6	4.853		53.6	4.4811		53.6	4.3068
	53.7	4.343		53.7	3.865		53.7	4.7726		53.7	4.4457		53.7	4.2225
	53.8	4.5826		53.8	3.7997		53.8	4.7535		53.8	4.3549		53.8	4.1655
	53.9	4.876		53.9	3.9942		53.9	4.7344		53.9	4.6143		53.9	4.0324
	54	4.9158		54	3.9934		54	4.598		54	4.8297		54	3.7871
	54.1	4.8583		54.1	3.923		54.1	4.7387		54.1	4.9323		54.1	3.7625
	54.2	4.9275		54.2	3.9895		54.2	5.2769		54.2	4.5982		54.2	3.5843
	54.3	4.8892		54.3	4.0255		54.3	5.1876		54.3	4.79		54.3	3.7479
	54.4	4.804		54.4	4.0262		54.4	5.3867		54.4	4.7337		54.4	3.629
	54.5	4.5889		54.5	3.9131		54.5	5.6708		54.5	4.6271		54.5	3.5724
	54.6	4.6786		54.6	3.8768		54.6	5.8684		54.6	4.8625		54.6	3.6402
	54.7	4.6667		54.7	3.9898		54.7	6.0619		54.7	4.8963		54.7	3.5214
	54.8	4.2365		54.8	4.0868		54.8	5.8997		54.8	4.7942		54.8	3.6275
	54.9	4.1905		54.9	4.0858		54.9	5.6742		54.9	4.7369		54.9	3.9532
	55	4.1606		55	3.996		55	5.673		55	4.4016		55	3.9379
	55.1	4.2846		55.1	3.9438		55.1	5.7578		55.1	4.1873		55.1	3.7121
	55.2	4.0239		55.2	4.151		55.2	5.3659		55.2	4.1752		55.2	3.7656
	55.3	4.1466		55.3	4.0982		55.3	5.6283		55.3	4.12		55.3	3.7413
	55.4	4.1567		55.4	4.0411		55.4	5.5086		55.4	4.3001		55.4	3.4996
	55.5	4.0465		55.5	4.0576		55.5	5.5441		55.5	4.5272		55.5	3.4468
	55.6	4.1831		55.6	4.2924		55.6	5.3241		55.6	4.3369		55.6	3.4067
	55.7	4.1719		55.7	4.498		55.7	5.4887		55.7	4.0346		55.7	3.3263
	55.8	4.1682		55.8	4.3351		55.8	5.6232		55.8	3.6667		55.8	3.4301
	55.9	4.0699		55.9	4.1983		55.9	5.6104		55.9	3.6766		55.9	3.5055
	56	4.018		56	4.2226		56	5.7202		56	3.7674		56	3.6875
	56.1	4.2007		56.1	3.992		56.1	5.6115		56.1	3.7721		56.1	3.5643
	56.2	4.4065		56.2	4.2175		56.2	5.4544		56.2	3.7299		56.2	3.6946
	56.3	4.1694		56.3	4.4273		56.3	5.4894		56.3	3.5702		56.3	3.5536
	56.4	4.0324		56.4	4.3482		56.4	5.515		56.4	3.4923		56.4	3.456
	56.5	3.9352		56.5	3.9577		56.5	5.7291		56.5	3.5399		56.5	3.5519
	56.6	4.0251		56.6	3.9483		56.6	5.7189		56.6	3.6427		56.6	3.4336
	56.7	3.9928		56.7	3.8775		56.7	5.7148		56.7	3.4981		56.7	3.4891
	56.8	3.9587		56.8	4.0936		56.8	5.4581		56.8	3.3255		56.8	3.3668
	56.9	3.8886		56.9	4.185		56.9	5.2955		56.9	3.3662		56.9	3.6386
	57	3.7103		57	3.9609		57	5.2723		57	3.2031		57	3.7141
	57.1	3.7544		57.1	3.858		57.1	5.2066		57.1	3.1882		57.1	3.6802
	57.2	3.6414		57.2	3.776		57.2	4.9512		57.2	3.1409		57.2	3.9137
	57.3	3.5186		57.3	3.7583		57.3	5.0327		57.3	3.1803		57.3	3.6938
	57.4	3.6311		57.4	3.8584		57.4	5.1661		57.4	3.103		57.4	3.6854
	57.5	3.6116		57.5	3.9499		57.5	5.0255		57.5	3.2092		57.5	3.6162
	57.6	3.8139		57.6	3.9616		57.6	4.8951		57.6	3.3345		57.6	3.6235
	57.7	3.7473		57.7	4.108		57.7	4.7051		57.7	3.2297		57.7	3.627
	57.8	3.4262		57.8	3.9329		57.8	4.3715		57.8	3.3039		57.8	3.603
	57.9	3.6726		57.9	4.0128		57.9	4.6675		57.9	3.1779		57.9	3.7061
	58	3.7559		58	3.6637		58	4.7234		58	3.2077		58	3.7761
	58.1	3.5516		58.1	3.5018		58.1	4.7005		58.1	3.1383		58.1	3.6118
	58.2	3.725		58.2	3.4972		58.2	4.7701		58.2	3.1525		58.2	3.6332
	58.3	3.602		58.3	3.6799		58.3	4.771		58.3	3.2261		58.3	3.6214
	58.4	3.7139		58.4	3.7778		58.4	4.3155		58.4	3.1575		58.4	3.6675
	58.5	3.529		58.5	3.7145		58.5	4.3954		58.5	3.2239		58.5	3.6469
	58.6	3.6653		58.6	3.7073		58.6	4.9662		58.6	3.1572		58.6	3.6082
	58.7	3.6187		58.7	3.8309		58.7	4.8739		58.7	3.2782		58.7	3.6913
	58.8	3.5902		58.8	4.0103		58.8	4.9604		58.8	3.236		58.8	3.8783
	58.9	3.5875		58.9	3.929		58.9	4.6643		58.9	3.5997		58.9	3.833
	59	3.7254		59	3.8276		59	4.9168		59	3.6185		59	4.0016
	59.1	3.7437		59.1	3.9084		59.1	4.642		59.1	3.6007		59.1	3.7931
	59.2	3.7972		59.2	4.0893		59.2	4.79		59.2	3.5376		59.2	3.8365
	59.3	4.0729		59.3	3.9796		59.3	4.8059		59.3	3.5624		59.3	3.9476
	59.4	3.9532		59.4	3.9129		59.4	4.696		59.4	3.5439		59.4	3.6045
	59.5	3.9299		59.5	3.9096		59.5	4.8969		59.5	3.4293		59.5	3.4698
	59.6	3.9812		59.6	3.8928		59.6	4.9481		59.6	3.4655		59.6	3.7246
	59.7	3.9626		59.7	3.91		59.7	4.976		59.7	3.4809		59.7	3.7666
	59.8	3.8804		59.8	3.9058		59.8	4.9848		59.8	3.4482		59.8	3.7787
	59.9	3.9705		59.9	4.0035		59.9	5.2245		59.9	3.4365		59.9	4.0062
	60	3.9253		60	4.0901		60	5.1322		60	3.3445		60	4.0827
	60.1	3.7568		60.1	3.8065		60.1	5.1273		60.1	3.3946		60.1	4.2637
	60.2	3.8181		60.2	3.9328		60.2	5.3726		60.2	3.404		60.2	4.611
	60.3	3.8665		60.3	4.2474		60.3	5.2873		60.3	3.2969		60.3	4.8215
	60.4	3.6014		60.4	4.1181		60.4	4.9505		60.4	3.539		60.4	4.3744
	60.5	3.7753		60.5	3.9805		60.5	4.8772		60.5	3.7233		60.5	4.5996
	60.6	3.9228		60.6	4.0891		60.6	4.4748		60.6	3.8583		60.6	4.5864
	60.7	3.9557		60.7	4.059		60.7	4.4119		60.7	3.7258		60.7	4.1463
	60.8	3.7892		60.8	4.1461		60.8	4.4437		60.8	3.5838		60.8	3.9523
	60.9	3.8639		60.9	4.1837		60.9	4.381		60.9	3.3477		60.9	4.1411
	61	3.8232		61	4.4143		61	4.2694		61	3.3259		61	4.132
	61.1	3.6753		61.1	4.3306		61.1	4.257		61.1	3.4844		61.1	4.2884
	61.2	3.5955		61.2	4.2903		61.2	4.4659		61.2	3.4241		61.2	4.119
	61.3	3.5428		61.3	4.3458		61.3	4.7279		61.3	3.3236		61.3	4.5877
	61.4	3.6566		61.4	4.219		61.4	4.8433		61.4	3.4966		61.4	4.1227
	61.5	3.8087		61.5	4.2744		61.5	4.9596		61.5	3.5		61.5	3.9978
	61.6	3.8732		61.6	4.3837		61.6	4.6627		61.6	3.5695		61.6	4.0571
	61.7	3.7766		61.7	4.2313		61.7	4.4664		61.7	3.6738		61.7	3.8935
	61.8	3.7579		61.8	4.3248		61.8	4.2166		61.8	3.6799		61.8	3.8812
	61.9	3.6845		61.9	4.1433		61.9	4.1999		61.9	3.6765		61.9	3.9237
	62	3.4931		62	4.2093		62	4.159		62	3.5371		62	3.9777
	62.1	3.6933		62.1	4.1388		62.1	4.2914		62.1	3.7719		62.1	4.0186
	62.2	3.7214		62.2	4.0358		62.2	4.2122		62.2	3.939		62.2	4.0574
	62.3	4.0609		62.3	3.8463		62.3	4.2898		62.3	3.7511		62.3	4.1241
	62.4	4.0447		62.4	3.9263		62.4	4.5906		62.4	3.9828		62.4	4.0295
	62.5	4.113		62.5	3.8527		62.5	4.6872		62.5	3.9508		62.5	4.084
	62.6	4.1894		62.6	3.7616		62.6	4.7074		62.6	3.8068		62.6	4.1869
	62.7	4.1296		62.7	3.6892		62.7	4.6412		62.7	3.7897		62.7	4.4396
	62.8	4.1646		62.8	3.9691		62.8	4.8068		62.8	3.6219		62.8	4.4415
	62.9	4.2751		62.9	3.829		62.9	4.8823		62.9	3.7318		62.9	4.318
	63	4.0301		63	4.0407		63	4.7713		63	4.0706		63	4.3065
	63.1	3.8446		63.1	3.9884		63.1	4.6525		63.1	3.6864		63.1	4.3344
	63.2	3.6862		63.2	4.1088		63.2	4.7043		63.2	3.5771		63.2	4.4916
	63.3	3.6357		63.3	3.9617		63.3	4.9518		63.3	3.5471		63.3	4.4435
	63.4	3.6997		63.4	4.1518		63.4	5.0778		63.4	3.6557		63.4	4.1535
	63.5	3.4062		63.5	4.0528		63.5	4.7774		63.5	3.6584		63.5	4.2038
	63.6	3.404		63.6	4.3135		63.6	4.4936		63.6	3.4778		63.6	4.2743
	63.7	3.5218		63.7	4.2238		63.7	4.4458		63.7	3.4248		63.7	4.231
	63.8	3.4913		63.8	4.382		63.8	4.3275		63.8	3.5277		63.8	4.3415
	63.9	3.6898		63.9	4.5778		63.9	4.297		63.9	3.5219		63.9	4.2743
	64	3.5562		64	4.7544		64	4.2908		64	3.2708		64	4.2644
	64.1	3.6002		64.1	4.8177		64.1	4.3566		64.1	3.1407		64.1	3.9545
	64.2	3.544		64.2	4.7974		64.2	4.547		64.2	3.1504		64.2	4.0185
	64.3	3.4783		64.3	4.8193		64.3	4.2772		64.3	3.1987		64.3	3.8629
	64.4	3.5538		64.4	4.8431		64.4	4.1677		64.4	3.1264		64.4	4.149
	64.5	3.6207		64.5	4.8646		64.5	4.053		64.5	3.0488		64.5	4.0986
	64.6	3.5685		64.6	4.8134		64.6	4.0965		64.6	3.1995		64.6	4.1384
	64.7	3.489		64.7	4.9134		64.7	4.0495		64.7	3.1182		64.7	4.0486
	64.8	3.6175		64.8	4.6675		64.8	4.049		64.8	3.0671		64.8	4.2173
	64.9	3.5821		64.9	4.9791		64.9	4.2336		64.9	2.9676		64.9	4.2392
	65	3.5591		65	4.6761		65	4.2251		65	3.2196		65	4.2131
	65.1	3.5092		65.1	4.8882		65.1	4.3841		65.1	3.2611		65.1	3.9491
	65.2	3.4406		65.2	4.743		65.2	3.9958		65.2	3.2032		65.2	4.1975
	65.3	3.4323		65.3	4.897		65.3	3.8851		65.3	3.3315		65.3	4.1474
	65.4	3.2526		65.4	4.5968		65.4	3.9751		65.4	3.3188		65.4	4.114
	65.5	3.2214		65.5	4.7027		65.5	4.049		65.5	3.1978		65.5	3.996
	65.6	3.4427		65.6	4.8114		65.6	3.8423		65.6	3.1057		65.6	3.9062
	65.7	3.4393		65.7	4.9027		65.7	3.9851		65.7	3.0344		65.7	3.7781
	65.8	3.3937		65.8	5.0331		65.8	4.0857		65.8	3.0657		65.8	3.7203
	65.9	3.4091		65.9	4.9411		65.9	3.9803		65.9	3.1479		65.9	3.6329
	66	3.2342		66	5.3055		66	3.898		66	3.0885		66	3.7054
	66.1	3.326		66.1	5.2155		66.1	3.9229		66.1	3.2188		66.1	3.6684
	66.2	3.3402		66.2	5.0428		66.2	3.7962		66.2	3.2156		66.2	3.7155
	66.3	3.3666		66.3	4.4861		66.3	3.7844		66.3	3.2505		66.3	3.9418
	66.4	3.592		66.4	4.4114		66.4	3.5725		66.4	3.1403		66.4	3.7437
	66.5	3.6882		66.5	4.3666		66.5	3.4467		66.5	3.2481		66.5	3.7187
	66.6	3.6863		66.6	4.4836		66.6	3.3237		66.6	3.4454		66.6	3.9152
	66.7	3.622		66.7	4.6348		66.7	3.2801		66.7	3.5453		66.7	3.9426
	66.8	3.919		66.8	4.8096		66.8	3.3266		66.8	3.6439		66.8	3.8837
	66.9	3.7347		66.9	4.858		66.9	3.2922		66.9	3.4751		66.9	3.9375
	67	3.6893		67	4.5023		67	3.1508		67	3.3544		67	4.0899
	67.1	3.6625		67.1	4.3764		67.1	3.3417		67.1	3.4326		67.1	4.0846
	67.2	3.5072		67.2	4.2565		67.2	3.4226		67.2	3.3132		67.2	4.3222
	67.3	3.6346		67.3	4.4132		67.3	3.352		67.3	3.3364		67.3	4.508
	67.4	3.5231		67.4	4.313		67.4	3.5363		67.4	3.3844		67.4	4.3087
	67.5	3.8081		67.5	4.333		67.5	3.4013		67.5	3.5075		67.5	4.1977
	67.6	3.7173		67.6	4.0796		67.6	3.357		67.6	3.4149		67.6	4.3004
	67.7	3.7068		67.7	4.1156		67.7	3.5001		67.7	3.661		67.7	4.2683
	67.8	3.7659		67.8	4.2884		67.8	3.4102		67.8	3.4138		67.8	4.5
	67.9	3.4877		67.9	4.327		67.9	3.3349		67.9	3.275		67.9	4.5111
	68	3.4944		68	4.2514		68	3.2008		68	3.3235		68	4.6641
	68.1	3.4032		68.1	4.3371		68.1	3.1382		68.1	3.3347		68.1	4.5623
	68.2	3.3315		68.2	4.3362		68.2	3.1479		68.2	3.2299		68.2	4.5037
	68.3	3.3928		68.3	3.9829		68.3	3.199		68.3	3.1153		68.3	4.5628
	68.4	3.3685		68.4	4.2417		68.4	3.0854		68.4	3.1854		68.4	4.3057
	68.5	3.3191		68.5	4.2224		68.5	3.0432		68.5	3.224		68.5	4.277
	68.6	3.2492		68.6	4.1093		68.6	3.1161		68.6	3.1739		68.6	4.1711
	68.7	3.3142		68.7	4.1641		68.7	3.3558		68.7	3.113		68.7	4.3346
	68.8	3.4619		68.8	4.2328		68.8	3.3962		68.8	2.999		68.8	4.7363
	68.9	3.4675		68.9	4.3555		68.9	3.4467		68.9	3.0031		68.9	4.6476
	69	3.6315		69	4.3492		69	3.5771		69	3.0768		69	4.8879
	69.1	3.7319		69.1	4.8035		69.1	3.5146		69.1	3.1233		69.1	4.712
	69.2	3.6103		69.2	4.4933		69.2	3.5276		69.2	3.2054		69.2	4.7551
	69.3	3.7625		69.3	4.3298		69.3	3.5514		69.3	3.1288		69.3	4.9209
	69.4	3.6746		69.4	4.2772		69.4	3.6721		69.4	3.2848		69.4	4.915
	69.5	3.6925		69.5	4.329		69.5	3.6586		69.5	3.2648		69.5	4.7606
	69.6	3.6634		69.6	4.1607		69.6	3.5813		69.6	3.2317		69.6	4.7203
	69.7	3.635		69.7	4.2585		69.7	3.6025		69.7	3.1775		69.7	4.8937
	69.8	3.388		69.8	4.1767		69.8	3.6145		69.8	3.2828		69.8	5.1056
	69.9	3.4579		69.9	3.9711		69.9	3.6934		69.9	3.2595		69.9	5.0656
	70	3.6609		70	3.74		70	3.742		70	3.3413		70	5.097
	70.1	3.5714		70.1	3.7702		70.1	3.8184		70.1	3.3696		70.1	4.8876
	70.2	3.748		70.2	3.93		70.2	3.7765		70.2	3.6265		70.2	5.0064
	70.3	3.5904		70.3	4.1869		70.3	3.6632		70.3	3.5398		70.3	5.1453
	70.4	3.6575		70.4	4.0591		70.4	3.673		70.4	3.5783		70.4	4.9806
	70.5	3.7396		70.5	4.1592		70.5	3.9403		70.5	3.4503		70.5	4.9744
	70.6	3.7645		70.6	4.0623		70.6	3.6595		70.6	3.5033		70.6	4.9437
	70.7	3.8404		70.7	3.8976		70.7	3.7496		70.7	3.4051		70.7	4.5465
	70.8	3.5001		70.8	3.8744		70.8	3.5503		70.8	3.3476		70.8	4.4205
	70.9	3.6774		70.9	3.9715		70.9	3.505		70.9	3.2383		70.9	4.3824
	71	3.4862		71	4.0174		71	3.6453		71	3.228		71	4.3752
	71.1	3.561		71.1	3.9644		71.1	3.3605		71.1	3.1546		71.1	4.2458
	71.2	3.3374		71.2	3.7409		71.2	3.3388		71.2	3.2048		71.2	4.2721
	71.3	3.5877		71.3	3.9444		71.3	3.233		71.3	3.0952		71.3	4.1585
	71.4	3.5665		71.4	4.197		71.4	3.2463		71.4	3.1962		71.4	4.4349
	71.5	3.7332		71.5	4.0756		71.5	3.3442		71.5	3.173		71.5	4.4253
	71.6	3.692		71.6	4.2954		71.6	3.3258		71.6	3.1416		71.6	4.1567
	71.7	3.7068		71.7	4.3677		71.7	3.1942		71.7	3.0349		71.7	3.9653
	71.8	3.7798		71.8	4.5186		71.8	3.2173		71.8	3.1091		71.8	4.1053
	71.9	3.9249		71.9	4.2805		71.9	2.9841		71.9	3.1772		71.9	3.8342
	72	3.7809		72	4.3315		72	3.1751		72	3.1369		72	4.0017
	72.1	4.0018		72.1	4.3744		72.1	3.4244		72.1	2.9906		72.1	3.8173
	72.2	3.9035		72.2	4.2509		72.2	3.2275		72.2	3.0131		72.2	3.8281
	72.3	3.7731		72.3	4.1983		72.3	3.3837		72.3	3.0248		72.3	3.8668
	72.4	3.9305		72.4	4.3079		72.4	3.598		72.4	3.0099		72.4	4.0409
	72.5	3.8166		72.5	4.2383		72.5	3.4738		72.5	3.0554		72.5	3.9737
	72.6	3.6947		72.6	4.2628		72.6	3.4865		72.6	3.0949		72.6	3.8687
	72.7	3.5299		72.7	4.2627		72.7	3.7062		72.7	3.0741		72.7	3.82
	72.8	3.4592		72.8	4.0015		72.8	3.9386		72.8	3.1599		72.8	3.8391
	72.9	3.5385		72.9	4.0188		72.9	4.057		72.9	3.2279		72.9	3.9816
	73	3.6095		73	4.0941		73	3.8953		73	3.1786		73	3.9791
	73.1	3.5744		73.1	4.0176		73.1	4.0477		73.1	3.3033		73.1	3.9647
	73.2	3.359		73.2	3.957		73.2	3.8861		73.2	3.2263		73.2	3.8974
	73.3	3.4508		73.3	3.8369		73.3	4.2761		73.3	3.2975		73.3	3.7164
	73.4	3.447		73.4	3.7843		73.4	4.2222		73.4	3.2295		73.4	3.7388
	73.5	3.4629		73.5	3.823		73.5	4.2275		73.5	3.0808		73.5	3.8131
	73.6	3.4651		73.6	3.8633		73.6	4.3584		73.6	3.1574		73.6	3.8514
	73.7	3.466		73.7	3.7886		73.7	4.474		73.7	3.2251		73.7	3.7665
	73.8	3.62		73.8	3.7751		73.8	4.0294		73.8	3.2903		73.8	3.6029
	73.9	3.5915		73.9	3.9366		73.9	4.1158		73.9	3.1807		73.9	3.5172
	74	3.6968		74	3.8454		74	4.1251		74	3.1061		74	3.5048
	74.1	4.0194		74.1	3.6375		74.1	3.9665		74.1	3.2378		74.1	3.7067
	74.2	4.0689		74.2	3.7801		74.2	4.2197		74.2	3.211		74.2	3.7234
	74.3	3.9199		74.3	3.7886		74.3	4.0332		74.3	3.2285		74.3	3.631
	74.4	3.7418		74.4	3.6597		74.4	3.762		74.4	3.1918		74.4	3.6068
	74.5	3.8006		74.5	3.5747		74.5	3.6922		74.5	3.1392		74.5	3.6538
	74.6	3.9861		74.6	3.7393		74.6	3.856		74.6	3.1359		74.6	3.6536
	74.7	3.7437		74.7	3.9022		74.7	3.9562		74.7	3.1644		74.7	3.6385
	74.8	3.8991		74.8	4.0099		74.8	4.1998		74.8	3.1149		74.8	3.6615
	74.9	4.0205		74.9	3.828		74.9	4.1041		74.9	3.1029		74.9	3.8123
	75	4.1041		75	3.9308		75	3.9362		75	3.2473		75	3.6544
	75.1	4.29		75.1	3.9244		75.1	3.8895		75.1	3.1573		75.1	3.5774
	75.2	4.6695		75.2	3.9225		75.2	3.6473		75.2	3.141		75.2	3.4264
	75.3	4.6064		75.3	3.8466		75.3	3.6132		75.3	3.2643		75.3	3.608
	75.4	4.4335		75.4	3.8956		75.4	3.713		75.4	3.2929		75.4	3.7475
	75.5	4.5026		75.5	4.0759		75.5	3.6555		75.5	3.4033		75.5	3.8917
	75.6	4.2247		75.6	3.9696		75.6	3.7912		75.6	3.2129		75.6	3.7862
	75.7	4.1888		75.7	3.9843		75.7	3.8124		75.7	3.2339		75.7	3.7467
	75.8	4.0494		75.8	3.8828		75.8	3.711		75.8	3.3743		75.8	4.0203
	75.9	4.291		75.9	4.2798		75.9	3.7876		75.9	3.3795		75.9	3.8807
	76	4.0061		76	4.5705		76	3.8098		76	3.5122		76	3.9238
	76.1	4.3653		76.1	4.1859		76.1	3.8592		76.1	3.3304		76.1	4.0166
	76.2	4.1504		76.2	3.8742		76.2	3.8125		76.2	3.4319		76.2	4.0092
	76.3	4.388		76.3	4.1046		76.3	3.878		76.3	3.2797		76.3	3.9514
	76.4	4.1959		76.4	3.8346		76.4	3.6457		76.4	3.3103		76.4	4.0477
	76.5	4.0662		76.5	3.8548		76.5	3.6546		76.5	3.3296		76.5	3.9291
	76.6	3.9279		76.6	3.6038		76.6	3.3466		76.6	3.2216		76.6	4.0685
	76.7	4.1059		76.7	3.3615		76.7	3.5211		76.7	3.1248		76.7	4.1326
	76.8	4.4996		76.8	3.414		76.8	3.3558		76.8	3.1675		76.8	3.9333
	76.9	4.2123		76.9	3.3828		76.9	3.1602		76.9	3.2385		76.9	3.8576
	77	4.0633		77	3.5087		77	3.2667		77	3.0953		77	3.8402
	77.1	4.0458		77.1	3.3581		77.1	3.2692		77.1	3.0486		77.1	4.0726
	77.2	4.1554		77.2	3.4668		77.2	3.4698		77.2	3.0827		77.2	4.1755
	77.3	3.8727		77.3	3.4523		77.3	3.4164		77.3	3.0635		77.3	4.2229
	77.4	3.8538		77.4	3.2701		77.4	3.1058		77.4	3.1314		77.4	4.513
	77.5	3.5423		77.5	3.3131		77.5	3.0701		77.5	3.2431		77.5	4.4708
	77.6	3.6635		77.6	3.265		77.6	3.2747		77.6	3.2687		77.6	4.514
	77.7	3.6956		77.7	3.3574		77.7	3.242		77.7	3.1739		77.7	4.317
	77.8	3.448		77.8	3.3244		77.8	3.3898		77.8	3.2279		77.8	4.0657
	77.9	3.4754		77.9	3.2595		77.9	3.3533		77.9	3.1743		77.9	4.1639
	78	3.5534		78	3.2916		78	3.5884		78	3.2123		78	4.1427
	78.1	3.7281		78.1	3.5289		78.1	3.5266		78.1	3.1867		78.1	4.2095
	78.2	3.5354		78.2	3.5136		78.2	3.8186		78.2	3.2199		78.2	4.2787
	78.3	3.5227		78.3	3.586		78.3	3.9794		78.3	3.253		78.3	4.4216
	78.4	3.3677		78.4	3.7932		78.4	4.1502		78.4	3.3812		78.4	4.1809
	78.5	3.6104		78.5	3.945		78.5	3.7253		78.5	3.3729		78.5	3.9243
	78.6	3.5676		78.6	3.9919		78.6	3.4333		78.6	3.3447		78.6	4.1465
	78.7	3.2227		78.7	3.9842		78.7	3.266		78.7	3.3122		78.7	4.1443
	78.8	3.2799		78.8	4.2343		78.8	3.3174		78.8	3.3974		78.8	4.0509
	78.9	3.3525		78.9	4.0404		78.9	3.4228		78.9	3.3815		78.9	4.0621
	79	3.4296		79	4.0756		79	3.5281		79	3.3236		79	4.0933
	79.1	3.4337		79.1	3.9514		79.1	3.6161		79.1	3.2729		79.1	4.3426
	79.2	3.4769		79.2	4.2385		79.2	3.6576		79.2	3.3278		79.2	4.2804
	79.3	3.5227		79.3	4.0005		79.3	3.6792		79.3	3.264		79.3	4.3293
	79.4	3.5303		79.4	3.7971		79.4	3.7444		79.4	3.2418		79.4	4.1901
	79.5	3.4347		79.5	4.0227		79.5	3.7456		79.5	3.2041		79.5	4.2788
	79.6	3.5095		79.6	4.216		79.6	3.7125		79.6	3.111		79.6	4.1903
	79.7	3.5309		79.7	4.4269		79.7	3.8343		79.7	3.1065		79.7	4.1694
	79.8	3.5636		79.8	4.4027		79.8	3.9956		79.8	3.1197		79.8	4.3569
	79.9	3.5606		79.9	4.3661		79.9	3.9487		79.9	3.2005		79.9	4.2906
	80	3.5719		80	4.2718		80	4.0487		80	3.2952		80	4.486
	80.1	3.3214		80.1	4.1424		80.1	3.9499		80.1	3.1453		80.1	4.8127
	80.2	3.3545		80.2	4.4052		80.2	3.9993		80.2	3.3202		80.2	4.7463
	80.3	3.1748		80.3	4.4148		80.3	4.0087		80.3	3.3197		80.3	4.4912
	80.4	3.1898		80.4	4.4597		80.4	3.9924		80.4	3.3525		80.4	4.8079
	80.5	3.1682		80.5	4.4478		80.5	4.0075		80.5	3.5306		80.5	4.7165
	80.6	3.2255		80.6	4.5768		80.6	3.9443		80.6	3.3077		80.6	4.8694
	80.7	3.5051		80.7	4.3338		80.7	4.1015		80.7	3.3612		80.7	4.712
	80.8	3.3383		80.8	4.1113		80.8	3.9537		80.8	3.4987		80.8	4.6352
	80.9	3.3513		80.9	4.0741		80.9	3.9467		80.9	3.2803		80.9	4.5461
	81	3.3599		81	4.3537		81	3.9992		81	3.224		81	4.6002
	81.1	3.2316		81.1	4.5649		81.1	3.964		81.1	3.2708		81.1	4.4878
	81.2	3.2742		81.2	4.6766		81.2	3.8817		81.2	3.0852		81.2	4.2202
	81.3	3.1533		81.3	4.6236		81.3	4.0606		81.3	3.2343		81.3	4.1809
	81.4	3.1433		81.4	4.4159		81.4	3.8829		81.4	3.3444		81.4	4.2906
	81.5	3.1158		81.5	4.0512		81.5	3.9491		81.5	3.257		81.5	4.2695
	81.6	3.0989		81.6	3.8612		81.6	3.804		81.6	3.2096		81.6	4.3233
	81.7	3.1046		81.7	3.9136		81.7	3.8192		81.7	3.2268		81.7	4.301
	81.8	3.1863		81.8	3.6935		81.8	3.6476		81.8	3.3237		81.8	4.0551
	81.9	3.0962		81.9	3.6284		81.9	3.9165		81.9	3.3744		81.9	3.8982
	82	3.1456		82	3.5619		82	3.975		82	3.2219		82	4.0895
	82.1	3.1758		82.1	3.3589		82.1	4.0774		82.1	3.3923		82.1	4.1834
	82.2	3.1949		82.2	3.5298		82.2	4.0205		82.2	3.3966		82.2	3.8402
	82.3	3.3182		82.3	3.5441		82.3	4.0623		82.3	3.2503		82.3	4.0487
	82.4	3.3829		82.4	3.736		82.4	4.0174		82.4	3.29		82.4	4.2736
	82.5	3.2046		82.5	3.8415		82.5	3.9751		82.5	3.2899		82.5	3.8201
	82.6	3.3264		82.6	3.807		82.6	3.7435		82.6	3.3765		82.6	4.0084
	82.7	3.3321		82.7	3.762		82.7	3.8049		82.7	3.2445		82.7	4.1835
	82.8	3.4034		82.8	3.9097		82.8	3.7509		82.8	3.256		82.8	4.1228
	82.9	3.4412		82.9	3.7381		82.9	3.7314		82.9	3.2161		82.9	4.1737
	83	3.2878		83	4.0203		83	3.8286		83	3.1163		83	4.4603
	83.1	3.5298		83.1	3.9398		83.1	3.9913		83.1	3.1253		83.1	4.5579
	83.2	3.6545		83.2	4.1158		83.2	3.9241		83.2	3.1278		83.2	4.6965
	83.3	3.6644		83.3	4.0863		83.3	3.9752		83.3	3.311		83.3	4.4621
	83.4	3.5644		83.4	4.0971		83.4	4.083		83.4	3.2574		83.4	4.5432
	83.5	3.4366		83.5	3.8927		83.5	3.8812		83.5	3.2119		83.5	4.5922
	83.6	3.5169		83.6	3.8871		83.6	3.9739		83.6	3.0769		83.6	4.4294
	83.7	3.3442		83.7	3.7085		83.7	3.794		83.7	3.0156		83.7	4.2329
	83.8	3.3898		83.8	4.1462		83.8	3.7729		83.8	2.9886		83.8	4.141
	83.9	3.3082		83.9	4.2694		83.9	3.8337		83.9	3.1652		83.9	4.1386
	84	3.3279		84	4.0195		84	3.8098		84	3.1706		84	4.2936
	84.1	3.4458		84.1	4.0052		84.1	3.882		84.1	3.2906		84.1	4.0961
	84.2	3.6615		84.2	3.7605		84.2	3.7406		84.2	3.4282		84.2	4.0598
	84.3	3.5586		84.3	3.5772		84.3	3.9337		84.3	3.3242		84.3	4.2219
	84.4	3.5744		84.4	3.5053		84.4	3.9876		84.4	3.393		84.4	4.0549
	84.5	3.6573		84.5	3.7128		84.5	3.9368		84.5	3.3353		84.5	4.0195
	84.6	3.625		84.6	4.0066		84.6	3.9709		84.6	3.3187		84.6	4.0567
	84.7	3.5053		84.7	4.0742		84.7	4.0769		84.7	3.248		84.7	4.4411
	84.8	3.4688		84.8	3.9581		84.8	4.2836		84.8	3.3344		84.8	4.21
	84.9	3.3697		84.9	3.9393		84.9	4.1573		84.9	3.0749		84.9	4.4941
	85	3.2535		85	3.8738		85	4.052		85	3.1341		85	4.595
	85.1	3.231		85.1	3.8837		85.1	3.9917		85.1	3.1075		85.1	4.8313
	85.2	3.1778		85.2	3.7621		85.2	4.1754		85.2	3.1032		85.2	4.9007
	85.3	3.1039		85.3	3.7082		85.3	4.2619		85.3	3.0098		85.3	5.0012
	85.4	3.0876		85.4	3.4863		85.4	4.0415		85.4	3.0687		85.4	5.0507
	85.5	3.07		85.5	3.4745		85.5	3.9125		85.5	3.117		85.5	4.962
	85.6	2.9888		85.6	3.5131		85.6	4.0527		85.6	3.2105		85.6	5.1212
	85.7	2.9719		85.7	3.4795		85.7	3.9873		85.7	3.1367		85.7	5.2199
	85.8	3.0728		85.8	3.5258		85.8	3.8419		85.8	3.2597		85.8	5.0953
	85.9	3.1586		85.9	3.4908		85.9	3.8554		85.9	3.1853		85.9	5.092
	86	3.1193		86	3.3715		86	3.993		86	3.1136		86	5.1706
	86.1	3.0268		86.1	3.4443		86.1	3.7854		86.1	3.1665		86.1	5.1867
	86.2	3.1252		86.2	3.6104		86.2	3.7763		86.2	3.1307		86.2	5.0267
	86.3	3.133		86.3	3.5167		86.3	3.5971		86.3	3.2004		86.3	4.9235
	86.4	3.0185		86.4	3.5919		86.4	3.5862		86.4	3.1911		86.4	4.8504
	86.5	3.0428		86.5	3.7341		86.5	3.766		86.5	3.2172		86.5	4.7245
	86.6	2.938		86.6	3.647		86.6	3.8047		86.6	3.1802		86.6	4.8252
	86.7	2.9695		86.7	3.5837		86.7	3.8822		86.7	3.1529		86.7	4.6594
	86.8	3.0067		86.8	3.6007		86.8	4.032		86.8	3.1699		86.8	4.9122
	86.9	3.087		86.9	3.5197		86.9	4.1789		86.9	3.2455		86.9	4.6295
	87	3.1419		87	3.5604		87	4.4135		87	3.3982		87	4.7417
	87.1	3.0715		87.1	3.5121		87.1	4.3		87.1	3.2567		87.1	4.8021
	87.2	3.1757		87.2	3.5428		87.2	4.5834		87.2	3.2503		87.2	4.9712
	87.3	3.2185		87.3	3.4899		87.3	4.5064		87.3	3.2225		87.3	4.843
	87.4	3.1437		87.4	3.6581		87.4	4.6871		87.4	3.0298		87.4	4.8716
	87.5	3.105		87.5	3.6392		87.5	4.6278		87.5	3.2278		87.5	4.7491
	87.6	3.1004		87.6	3.5787		87.6	4.638		87.6	3.2356		87.6	4.4736
	87.7	3.1059		87.7	3.6645		87.7	4.3383		87.7	3.2628		87.7	4.4797
	87.8	3.1818		87.8	3.7102		87.8	4.4608		87.8	3.3187		87.8	4.5779
	87.9	3.2334		87.9	3.5838		87.9	4.4293		87.9	3.3253		87.9	4.6843
	88	3.035		88	3.6831		88	4.4281		88	3.3036		88	4.6299
	88.1	3.1625		88.1	3.7102		88.1	4.4814		88.1	3.3875		88.1	4.7132
	88.2	3.1959		88.2	3.7737		88.2	4.3597		88.2	3.2715		88.2	4.7741
	88.3	3.1004		88.3	3.7984		88.3	4.2562		88.3	3.3926		88.3	4.8401
	88.4	3.1353		88.4	3.8604		88.4	4.5826		88.4	3.3723		88.4	5.0802
	88.5	3.1107		88.5	3.9402		88.5	4.4938		88.5	3.3481		88.5	5.2997
	88.6	3.0161		88.6	3.7996		88.6	4.331		88.6	3.2133		88.6	5.2593
	88.7	3.1011		88.7	3.7124		88.7	4.2554		88.7	3.3552		88.7	5.2031
	88.8	3.1148		88.8	3.7096		88.8	4.2945		88.8	3.0914		88.8	5.4366
	88.9	3.0922		88.9	3.7341		88.9	4.1824		88.9	3.2355		88.9	5.4903
	89	2.996		89	3.7034		89	4.2046		89	3.386		89	5.7375
	89.1	3.0529		89.1	3.8423		89.1	3.9496		89.1	3.3104		89.1	5.5077
	89.2	3.0546		89.2	3.7387		89.2	3.9474		89.2	3.357		89.2	5.404
	89.3	2.9885		89.3	3.92		89.3	3.8485		89.3	3.3202		89.3	5.4029
	89.4	3.0996		89.4	3.9404		89.4	3.9284		89.4	3.4453		89.4	5.4996
	89.5	3.1404		89.5	3.8141		89.5	3.9047		89.5	3.4836		89.5	5.4888
	89.6	3.0985		89.6	3.7245		89.6	3.7385		89.6	3.3874		89.6	5.4445
	89.7	3.3362		89.7	3.6155		89.7	3.7365		89.7	3.3579		89.7	6.0338
	89.8	3.2174		89.8	3.4873		89.8	3.8567		89.8	3.4486		89.8	6.3979
	89.9	3.1837		89.9	3.4292		89.9	3.9279		89.9	3.3614		89.9	6.132
	90	3.1777		90	3.4562		90	3.8882		90	3.3567		90	5.7998
	90.1	3.2751		90.1	3.7032		90.1	4.0562		90.1	3.6281		90.1	5.7652
	90.2	3.1933		90.2	3.7281		90.2	4.1505		90.2	3.605		90.2	5.3321
	90.3	3.2503		90.3	3.5009		90.3	4.21		90.3	3.4983		90.3	5.0858
	90.4	3.2651		90.4	3.465		90.4	4.0619		90.4	3.5722		90.4	5.0868
	90.5	3.2232		90.5	3.3704		90.5	3.9922		90.5	3.8495		90.5	4.7152
	90.6	3.2078		90.6	3.1668		90.6	3.8933		90.6	3.7463		90.6	4.7813
	90.7	3.2267		90.7	3.2642		90.7	4.1387		90.7	3.9559		90.7	4.6738
	90.8	3.2493		90.8	3.2465		90.8	4.2248		90.8	4.0404		90.8	4.632
	90.9	3.2331		90.9	3.2645		90.9	4.1061		90.9	3.8305		90.9	4.6155
	91	3.1854		91	3.425		91	3.9055		91	3.7656		91	4.623
	91.1	3.0076		91.1	3.4043		91.1	4.1183		91.1	3.8326		91.1	4.8191
	91.2	3.1709		91.2	3.3745		91.2	4.2775		91.2	3.9663		91.2	4.2387
	91.3	3.1444		91.3	3.2546		91.3	4.3993		91.3	3.7977		91.3	4.4365
	91.4	3.1915		91.4	3.0982		91.4	4.4986		91.4	3.7439		91.4	4.4685
	91.5	3.1691		91.5	3.1255		91.5	4.2606		91.5	3.6484		91.5	4.3542
	91.6	3.0862		91.6	3.1633		91.6	4.2302		91.6	3.6718		91.6	4.0999
	91.7	3.0546		91.7	3.4361		91.7	4.2342		91.7	3.6817		91.7	4.1701
	91.8	3.076		91.8	3.3739		91.8	4.2529		91.8	3.6457		91.8	4.2942
	91.9	3.0594		91.9	3.3585		91.9	4.3062		91.9	3.4462		91.9	4.481
	92	3.0471		92	3.2664		92	4.3882		92	3.7121		92	4.4022
	92.1	3.1984		92.1	3.1796		92.1	4.6471		92.1	3.9568		92.1	4.2976
	92.2	3.1002		92.2	3.2262		92.2	4.6352		92.2	4.0523		92.2	4.2874
	92.3	3.2011		92.3	3.4155		92.3	4.6193		92.3	3.7789		92.3	4.5321
	92.4	3.2151		92.4	3.5246		92.4	4.5295		92.4	3.756		92.4	4.5506
	92.5	3.1733		92.5	3.2694		92.5	4.5191		92.5	3.6404		92.5	4.8107
	92.6	3.275		92.6	3.2024		92.6	4.0584		92.6	3.4948		92.6	4.6435
	92.7	3.0813		92.7	3.1502		92.7	3.8783		92.7	3.6799		92.7	4.5575
	92.8	3.1454		92.8	3.256		92.8	3.7788		92.8	3.3749		92.8	4.3528
	92.9	3.1144		92.9	3.2102		92.9	3.7475		92.9	3.4926		92.9	4.3244
	93	3.0056		93	3.392		93	3.7611		93	3.4669		93	4.2204
	93.1	3.1308		93.1	3.5241		93.1	3.9202		93.1	3.5583		93.1	3.9701
	93.2	3.1288		93.2	3.399		93.2	3.7674		93.2	3.5271		93.2	3.7634
	93.3	3.2715		93.3	3.5999		93.3	3.6544		93.3	3.6998		93.3	3.5949
	93.4	3.2152		93.4	3.4491		93.4	3.9232		93.4	3.7539		93.4	3.7287
	93.5	3.2054		93.5	3.2914		93.5	4.2032		93.5	3.8537		93.5	3.8671
	93.6	3.2323		93.6	3.2685		93.6	4.1347		93.6	3.8959		93.6	3.7312
	93.7	3.2853		93.7	3.3013		93.7	4.4284		93.7	3.9727		93.7	3.7318
	93.8	3.2398		93.8	3.179		93.8	4.4006		93.8	3.8654		93.8	3.6185
	93.9	3.2325		93.9	3.1513		93.9	4.1941		93.9	3.8463		93.9	3.6587
	94	3.0935		94	3.1415		94	4.3832		94	3.9488		94	3.7076
	94.1	3.1882		94.1	3.1961		94.1	4.4196		94.1	4.0146		94.1	3.8031
	94.2	3.2653		94.2	3.1238		94.2	4.2527		94.2	4.2096		94.2	3.715
	94.3	3.1158		94.3	3.2495		94.3	3.9642		94.3	4.304		94.3	3.4495
	94.4	3.1525		94.4	3.0579		94.4	4.1086		94.4	4.1969		94.4	3.4001
	94.5	3.2168		94.5	3.1835		94.5	3.9422		94.5	4.0051		94.5	3.4562
	94.6	3.2533		94.6	3.0968		94.6	3.9848		94.6	4.0449		94.6	3.3902
	94.7	3.3999		94.7	3.058		94.7	3.9254		94.7	4.1466		94.7	3.5962
	94.8	3.2659		94.8	3.1089		94.8	3.945		94.8	4.0412		94.8	3.5202
	94.9	3.2605		94.9	3.213		94.9	3.8063		94.9	4.0446		94.9	3.7297
	95	3.362		95	3.3087		95	3.767		95	4.0027		95	3.7417
	95.1	3.242		95.1	3.2347		95.1	3.7131		95.1	3.9935		95.1	3.7767
	95.2	3.3198		95.2	3.3079		95.2	3.7999		95.2	3.8175		95.2	3.724
	95.3	3.2446		95.3	3.3235		95.3	4.1329		95.3	3.6208		95.3	3.8265
	95.4	3.3948		95.4	3.4588		95.4	4.0487		95.4	3.6133		95.4	3.9232
	95.5	3.5198		95.5	3.3786		95.5	4.0458		95.5	3.4913		95.5	3.9416
	95.6	3.3158		95.6	3.3313		95.6	4.1524		95.6	3.5871		95.6	3.9576
	95.7	3.24		95.7	3.3189		95.7	4.186		95.7	3.3629		95.7	3.9473
	95.8	3.2939		95.8	3.4194		95.8	4.4122		95.8	3.4134		95.8	3.9654
	95.9	3.351		95.9	3.6077		95.9	4.4131		95.9	3.393		95.9	4.0371
	96	3.2862		96	3.4037		96	4.2861		96	3.2542		96	4.0237
	96.1	3.3184		96.1	3.1001		96.1	4.2118		96.1	3.3254		96.1	3.8109
	96.2	3.3406		96.2	3.1383		96.2	4.3736		96.2	3.3154		96.2	3.6699
	96.3	3.1911		96.3	3.1116		96.3	4.7374		96.3	3.325		96.3	3.6918
	96.4	3.1997		96.4	3.1313		96.4	4.7589		96.4	3.4214		96.4	3.6875
	96.5	3.2062		96.5	3.1982		96.5	4.5107		96.5	3.5457		96.5	3.67
	96.6	3.1752		96.6	3.1421		96.6	4.514		96.6	3.6311		96.6	3.7252
	96.7	3.4556		96.7	3.1456		96.7	4.6034		96.7	3.9882		96.7	3.7176
	96.8	3.4295		96.8	3.1309		96.8	4.3306		96.8	3.9203		96.8	3.7783
	96.9	3.2976		96.9	3.1996		96.9	4.5421		96.9	3.8849		96.9	3.6946
	97	3.2941		97	3.2885		97	4.5177		97	3.8063		97	3.5937
	97.1	3.2383		97.1	3.4991		97.1	4.6118		97.1	3.8851		97.1	3.8456
	97.2	3.2518		97.2	3.5309		97.2	4.4364		97.2	3.9896		97.2	3.7629
	97.3	3.2152		97.3	3.462		97.3	4.4668		97.3	3.9495		97.3	3.6618
	97.4	3.2732		97.4	3.3753		97.4	4.7509		97.4	4.2488		97.4	3.6775
	97.5	3.2676		97.5	3.2524		97.5	4.932		97.5	3.9637		97.5	3.5568
	97.6	3.3886		97.6	3.2679		97.6	4.8532		97.6	4.0008		97.6	3.5321
	97.7	3.5267		97.7	3.2308		97.7	4.8986		97.7	3.7407		97.7	3.625
	97.8	3.3851		97.8	3.222		97.8	5.4674		97.8	3.633		97.8	3.5483
	97.9	3.3714		97.9	3.0838		97.9	5.3885		97.9	3.6777		97.9	3.6308
	98	3.4234		98	3.1872		98	5.7683		98	3.535		98	3.6879
	98.1	3.4969		98.1	3.2203		98.1	5.9578		98.1	3.5049		98.1	3.6796
	98.2	3.5309		98.2	3.2474		98.2	6.039		98.2	3.6897		98.2	3.8001
	98.3	3.4736		98.3	3.0695		98.3	6.2673		98.3	3.4426		98.3	3.8866
	98.4	3.3554		98.4	3.1141		98.4	6.6254		98.4	3.2675		98.4	4.0035
	98.5	3.5487		98.5	3.1105		98.5	6.5965		98.5	3.1039		98.5	4.0019
	98.6	3.2302		98.6	3.1015		98.6	6.7587		98.6	3.218		98.6	4.2655
	98.7	3.2765		98.7	3.2518		98.7	6.5986		98.7	3.2774		98.7	4.0521
	98.8	3.2198		98.8	3.3262		98.8	6.2333		98.8	3.3739		98.8	4.0213
	98.9	3.1475		98.9	3.3255		98.9	6.3175		98.9	3.5085		98.9	4.1183
	99	3.1303		99	3.2838		99	6.397		99	3.5005		99	3.8521
	99.1	3.1096		99.1	3.2969		99.1	6.3266		99.1	3.3805		99.1	3.7576
	99.2	3.1552		99.2	3.3848		99.2	6.2065		99.2	3.5077		99.2	3.8575
	99.3	3.0568		99.3	3.3589		99.3	6.6591		99.3	3.3892		99.3	3.803
	99.4	3.0942		99.4	3.4106		99.4	6.7657		99.4	3.297		99.4	3.9073
	99.5	3.0484		99.5	3.5313		99.5	6.9046		99.5	3.4859		99.5	3.6091
	99.6	3.1221		99.6	3.3877		99.6	6.6295		99.6	3.6024		99.6	3.3497
	99.7	2.9363		99.7	3.3484		99.7	6.6555		99.7	3.3762		99.7	3.4617
	99.8	3.032		99.8	3.5536		99.8	6.2851		99.8	3.1851		99.8	3.5789
	99.9	3.1888		99.9	3.4059		99.9	6.0944		99.9	3.353		99.9	3.5568
	100	3.2102		100	3.5532		100	6.4299		100	3.4488		100	3.4496
