# Supplementary figures and images for: Syntaxin 17 recruitment to mature autophagosomes is temporally regulated by PI4P accumulation
Source: eLife journal article supplement (doi:10.7554/elife.92189), 2023-10-17

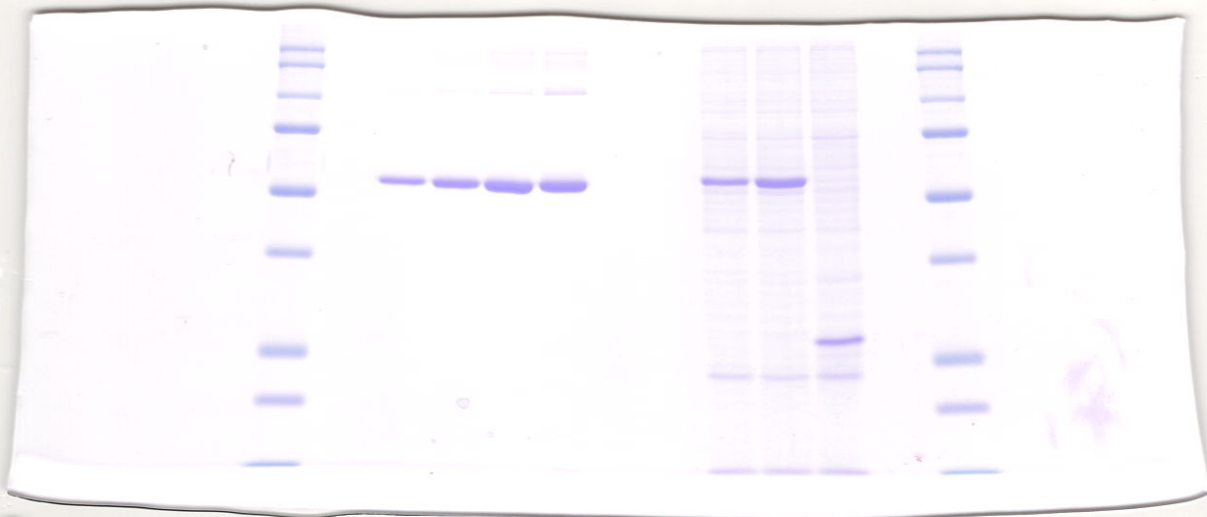

Supplement: fig4-data2 [file elife-92189-fig4-data2-v1.zip]
